# Supplementary material for: Tailoring flavin-based photosensitizers for efficient photooxidative coupling of benzylic amines
Source: Royal Society of Chemistry journal article supplement (doi:10.1039/d3cp04579j), 2023-11-21
Supplement: d3cp04579j1.pdf [file d3cp04579j1.pdf]

## Supporting Information for:

# Tailoring Flavin-based Photosensitizers for Efficient Photooxidative Coupling of Benzylic Amines

Huimin Guo\*, Yang Qiu, Siyu Liu, Xiangyu Zhang and Jianzhang Zhao

School of Chemistry, Dalian University of Technology, No. 2, Linggong Road, Dalian, 116024,  
P. R. China.

### Contents

|                                                                |     |
|----------------------------------------------------------------|-----|
| 1 General Information.....                                     | S2  |
| 2 Synthesis and Molecular Structure Characterization Data..... | S4  |
| 3 Optimization of Reaction Conditions.....                     | S7  |
| 3 NMR and HRMS spectra.....                                    | S9  |
| 4 DFT/TD-DFT Results.....                                      | S40 |
| 5 References.....                                              | S56 |

**This file includes 1 Scheme, 87 Figures and 9 Tables within 57 pages.**

**KEYWORDS:** Flavin; Electron Transfer; Intersystem Crossing; Photocatalysis; Photooxidation

---

\* Corresponding authors, email: [guohm@dlut.edu.cn](mailto:guohm@dlut.edu.cn) (H.G.)

## 1. General Information

All the chemicals used in synthesis were of analytical purity and were used as received. Solvents were dried and distilled before used for synthesis.

**Analytical Measurements.** All chemicals are analytically pure and used as received. NMR spectra were recorded on a Bruker 400 MHz spectrometer with  $\text{CDCl}_3$ ,  $\text{DMSO-}d_6$  as solvents and tetramethylsilane (TMS) as standard at 0.00 ppm. HRMS were measured with a G6224A (Agilent, U.S.).

**Spectroscopic Measurements.** Absorption spectrum were recorded on an UV2550 UV–Vis spectrophotometer (Shimadzu, Japan). Fluorescence spectra were measured on an FS5 spectrophotometer (Edinburgh Instruments, UK). Fluorescence lifetimes were measured with an OB920 luminescence lifetime spectrometer (Edinburgh Instruments, UK). The nanosecond transient absorption spectra were measured on LP920 laser flash photolysis spectrometer (Edinburgh Instruments Ltd., UK). Luminescence Quantum Yield were measured with an C13534-11 Quantaaurus-QY Plus (Hamamatsu Photonics, Japan).

**Preparation of Sample Solution for Spectroscopic Measurements.** The compound was dissolved in a small amount of solvent in a 5 mL volumetric flask and then toluene was added to get 5 mL solution ( $1.0 \times 10^{-3}$  M).

**Singlet Oxygen Quantum Yield ( $\Phi_{\Delta}$ ).** 1,3-Diphenylisobenzofuran (DPBF) was used as  $^1\text{O}_2$  scavenger and the  $^1\text{O}_2$  production was monitored by following the absorbance of DPBF at 414 nm. A comparative method was used and was calculated according to the following equation (1) to determine the singlet oxygen quantum yield.

$$\Phi_{\Delta,\text{nuk}} = \Phi_{\Delta,\text{std}} \left( \frac{A_{\text{std}}}{A_{\text{nuk}}} \right) \left( \frac{I_{\text{unk}}}{I_{\text{std}}} \right) \left( \frac{\eta_{\text{unk}}}{\eta_{\text{std}}} \right)^2 \quad (1)$$

In the above equation, unk and std indicate the unknown sample and the standard, respectively.  $\Phi$ ,  $A$ ,  $m$ , and  $\eta$  represent the singlet oxygen quantum yield, absorbance at excitation wavelength, slope of the absorbance of DPBF changing over time, and refractive index of the solvent used for measurement, respectively. Optically matched solutions were used (the solutions of the sample and the standard should give the same absorbance at the excitation wavelength). Anthracene was used as standard ( $\Phi_{\Delta} = 0.60$  in  $\text{CH}_3\text{CN}$ ).

## 2. Synthesis and Molecular Structure Characterization Data

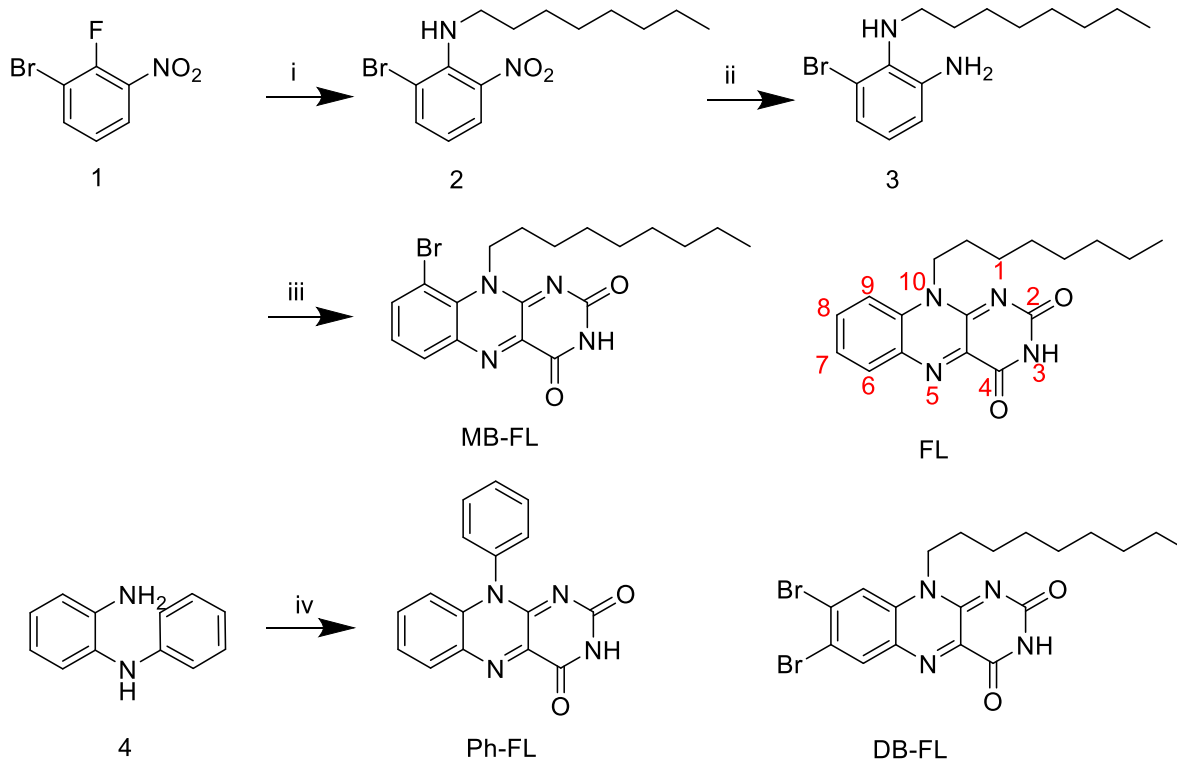

**Scheme S1.** Synthesis of the compounds. Reaction conditions: (i) Octyl amine, THF, 66 °C, 16 h ; (ii) Zn, NH<sub>4</sub>Cl, CH<sub>3</sub>OH/H<sub>2</sub>O, 45 °C, 24 h ; (iii) Alloxan, boric acid, acetic acid glacial, 70 °C, 3 h ; (iv) Alloxan, boric acid, acetic acid glacial, 25 °C, 12 h .

**Synthesis of the compound 2:** Compound 1 (219 mg, 1 mmol) was dissolved in a round-bottomed flask of tetrahydrofuran THF (40 ml). *N*-octylamine (1.2 ml, 6 mmol) and triethylamine (0.3 ml) were added with a syringe under nitrogen atmosphere. The reaction mixture was stirred at 66 °C for 16 h. At the end of the reaction, the crude product was purified by vacuum concentration and silica gel chromatography. The eluent was dichloromethane and petroleum ether (v/v=1:3), and the orange-yellow product 2 was obtained with the weight of 312 mg and the yield of 95.2%. <sup>1</sup>H NMR (400 MHz, CDCl<sub>3</sub>) : δ 0.85-0.95 (m, 3 H), 1.22-1.42(m, 11 H), 1.57-1.69 (m, 2 H), 3.28 (2 H, t, J = 7.07 Hz), 6.70 (t, J = 8.07 Hz, 1 H), 7.70 (dd, J = 7.75, 1.50 Hz, 1 H), 7.90 (dd, J=8.38, 1.50 Hz, 1 H).

**Synthesis of the compound MB-FL:** Compound 2 (275.5 mg, 0.84 mmol) was dissolved in a mixture of methanol-water (v/v=2:1), and zinc powder (274 mg, 4.2 mmol) and NH<sub>4</sub>Cl (456 mg, 8.2 mmol) were slowly added under the conditions of ice bath and nitrogen. The reaction was placed under 45 °C and nitrogen atmosphere for 24 h. The insoluble impurities were removed by vacuum filtration at the end of the reaction, and the pH of the solution was adjusted to neutral using NaHCO<sub>3</sub>. Dichloromethane is then used for extraction and decompression concentration to obtain crude product 3.

The crude product 3 (100 mg), boric acid (21.3 mg) and alloxouracil (60.6 mg) were dissolved in an appropriate amount of glacial acetic acid and stirred for 3 h at 70 °C. At the end of the reaction, the insoluble impurities are removed by filtration to obtain the crude product. The glacial acetic acid in the crude product was removed using a rotary evaporator and dichloromethane was added. The crude product was purified by silica gel chromatography. The eluent was dichloromethane and methanol (v/v=40:1), and the orange product was 49 mg (yield 36%). <sup>1</sup>H NMR (400 MHz, DMSO-d<sub>6</sub>) : δ 0.84-0.88 (m, 3 H), 1.27 (br. S., 10 H), 1.88 (br. S., 2 H), 4.86 (br. S., 2 H), 7.51 (t, J = 7.88 Hz, 1 H), 8.13 (d, J = 8.00 Hz, 1 H), 8.24 (d, J = 7.63 Hz, 1 H), 11.52 (s, 1 H). <sup>13</sup>C NMR (101 MHz, DMSO-d<sub>6</sub>) : δ 14.40 (s, 1 C), 22.53 (s, 1 C), 26.28 (s, 1 C), 28.64 (s, 1 C), 29.01 (s, 1 C), 29.12 (s, 1 C), 31.64 (s, 1 C), 48.06 (s, 1 C), 107.47 (s, 1 C), 127.12 (s, 1 C), 132.44 (s, 1 C), 133.32 (s, 1 C), 137.69 (s, 1 C), 139.40 (s, 1 C), 142.52 (s, 1 C), 152.58 (s, 1 C), 156.06 (s, 1 C), 159.89 (s, 1 C). ESI-TOF-HRMS ([C<sub>18</sub>H<sub>21</sub>BrN<sub>4</sub>O<sub>2</sub>+H]<sup>+</sup>) : Calculated value 405.0926, experimental value 405.0917.

**Synthesis of the compound Ph-FL:** The crude product 4 (50 mg), boric acid (21.3 mg) and alloxouracil (60.6 mg) were dissolved in an appropriate amount of glacial acetic acid and stirred overnight at room temperature and pressure. At the end of the reaction, the insoluble impurities

are removed by filtration to obtain the crude product. The glacial acetic acid in the crude product was removed by a rotary evaporator and dichloromethane was added. The crude product was purified by silica gel chromatography. The eluent was dichloromethane methane and methanol (v/v=40:1) to obtain a bright yellow product of 70.9 mg (90% yield).  $^1\text{H}$  NMR (400 MHz, DMSO- $d_6$ ) :  $\delta$  6.76 (d,  $J = 8.25$  Hz, 1 H), 7.44 (d,  $J = 7.25$  Hz, 2 H), 7.61 7.77 (m, 6 H), 8.20 (dd,  $J = 8.13, 1.25$  Hz, 1 H), 11.42 (s, 1 H).  $^{13}\text{C}$  NMR (101 MHz, DMSO- $d_6$ ) :  $\delta$  14.40 (s, 1 C), 22.53 (s, 1 C), 26.28 (s, 1 C), 28.64 (s, 1 C), 29.01 (s, 1 C), 29.12 (s, 1 C), 31.64 (s, 1 C), 48.06 (s, 1 C), 107.47 (s, 1 C), 127.12 (s, 1 C), 132.44 (s, 1 C), 133.32 (s, 1 C), 137.69 (s, 1 C), 139.40 (s, 1 C), 142.52 (s, 1 C), 152.58 (s, 1 C), 156.06 (s, 1 C), 159.89 (s, 1 C). ESI-TOF-HRMS ( $[\text{C}_{16}\text{H}_{10}\text{N}_4\text{O}_2\text{-H}]^-$ ) : Calculated value 289.0726, experimental value 289.0732.

### 3. Optimization of Reaction Conditions

Table S3-1 Optimization of reaction conditions for MB-FL sensitized photooxidative coupling of benzylamines for synthesis of imines.<sup>a,b</sup>

| Entry | Sensitizer | Sensitizer Concentration (mol %) | Duration (h) | Solvent                                  | Yield (%) |
|-------|------------|----------------------------------|--------------|------------------------------------------|-----------|
| 1     | MB-FL      | 0.5                              | 9            | DCM                                      | 42        |
| 2     | MB-FL      | 0.5                              | 9            | MeCN                                     | 75        |
| 3     | MB-FL      | 0.5                              | 9            | MeOH                                     | 40        |
| 4     | MB-FL      | 0.5                              | 9            | MeCN:MeOH                                | 67        |
| 5     | MB-FL      | 0.5                              | 9            | MeCN:H <sub>2</sub> O                    | 86        |
| 6     | MB-FL      | 0.5                              | 3            | MeCN:H <sub>2</sub> O                    | 63        |
| 7     | MB-FL      | 0.5                              | 5            | MeCN:H <sub>2</sub> O                    | 76        |
| 8     | MB-FL      | 0.5                              | 7            | MeCN:H <sub>2</sub> O                    | 80        |
| 9     | MB-FL      | 0.5                              | 11           | MeCN:H <sub>2</sub> O                    | 90        |
| 10    | None       | None                             | 9            | MeCN:H <sub>2</sub> O                    | 0         |
| 11    | MB-FL      | 0.5                              | 9            | MeCN:H <sub>2</sub> O, No light          | 0         |
| 12    | MB-FL      | 0.5                              | 9            | MeCN:H <sub>2</sub> O, No O <sub>2</sub> | 0         |

<sup>a</sup> Benzylamine (0.2 mmol) as substrate, the light wavelength was 451 nm, the light intensity was 1400 W/m<sup>2</sup>. Further experimental details and <sup>1</sup>H-NMR of product mixtures were included in the Supporting Information. <sup>b</sup> The composition of mixed MeCN /MeOH, DCM/MeOH and MeCN /H<sub>2</sub>O solvents are v:v = 9:1, otherwise specified.

Table S3-2 Optimization of reaction conditions for Ph-FL sensitized photooxidative coupling of benzyl amines for synthesis of imines.<sup>a,b</sup>

| Entry | Sensitizer | Sensitizer Concentration (mol %) | Duration (h) | Solvent                 | Yield (%) |
|-------|------------|----------------------------------|--------------|-------------------------|-----------|
| 1     | Ph -FL     | 0.5                              | 9            | MeOH                    | 8         |
| 2     | Ph -FL     | 0.5                              | 9            | MeCN                    | 53        |
| 3     | Ph -FL     | 0.5                              | 9            | DCM                     | 26        |
| 4     | Ph -FL     | 0.5                              | 9            | MeCN:MeOH               | 28        |
| 5     | Ph -FL     | 0.5                              | 9            | MeCN:H <sub>2</sub> O   | 14        |
| 6     | Ph -FL     | 0.5                              | 3            | MeCN                    | 35        |
| 7     | Ph -FL     | 0.5                              | 5            | MeCN                    | 40        |
| 8     | Ph -FL     | 0.5                              | 7            | MeCN                    | 44        |
| 9     | Ph -FL     | 0.5                              | 11           | MeCN                    | 58        |
| 10    | None       | None                             | 9            | MeCN                    | 0         |
| 11    | Ph -FL     | 0.5                              | 9            | MeCN, No light          | 0         |
| 12    | Ph -FL     | 0.5                              | 9            | MeCN, No O <sub>2</sub> | 0         |

<sup>a</sup> Benzylamine (0.2 mmol) as substrate, the light wavelength was 451 nm, the light intensity was 1400 W/m<sup>2</sup>. Further experimental details and <sup>1</sup>H-NMR of product mixtures were included in the Supporting Information. <sup>b</sup> The composition of mixed MeCN /MeOH and MeCN /H<sub>2</sub>O solvents are v:v = 9:1, unless specified explicitly.



#### 4. NMR and HRMS spectra

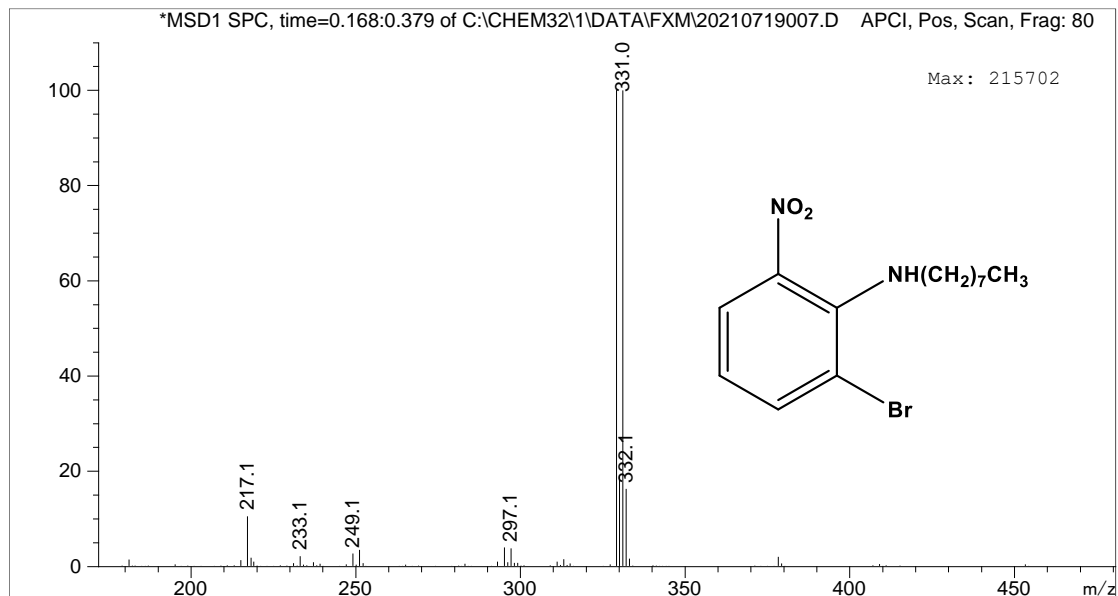

Figure S4-1. MS spectrum of **2**.

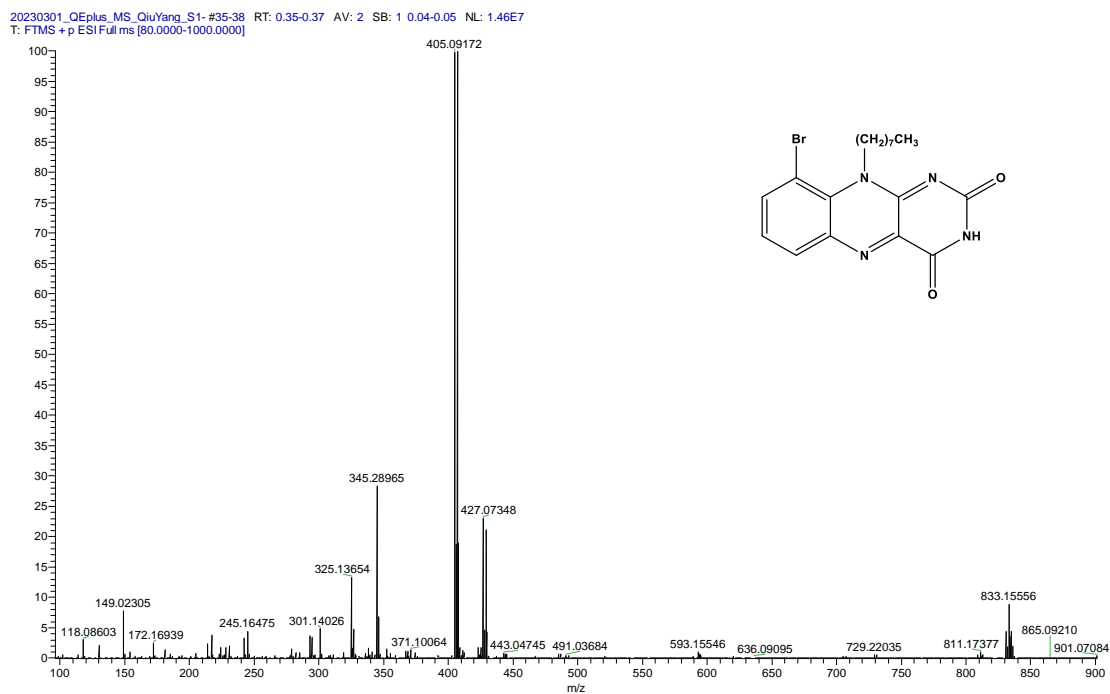

Figure S4-2. HRMS spectrum of **MB-FL**.

20230221\_QEplus\_MS\_Qiyang\_S1 #19 RT: 0.20 AV: 1 SB: 2 0.06-0.08 NL: 1.51E7  
T: FTMS - p ESI Full ms [80.0000-1000.0000]

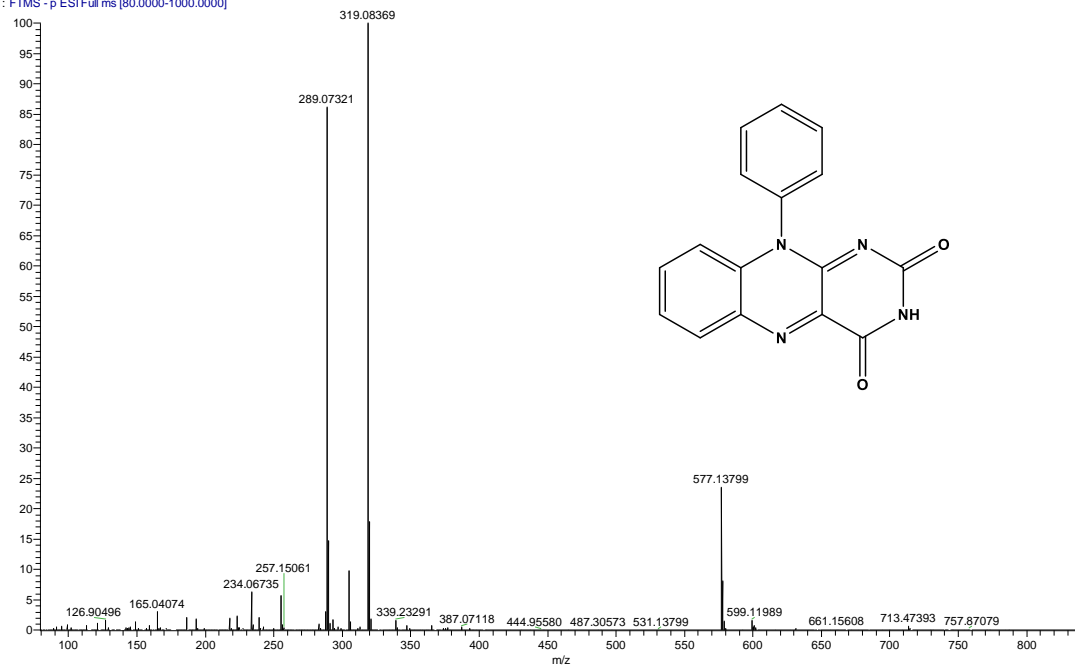

Figure S4-3. HRMS spectrum of Ph-FL.

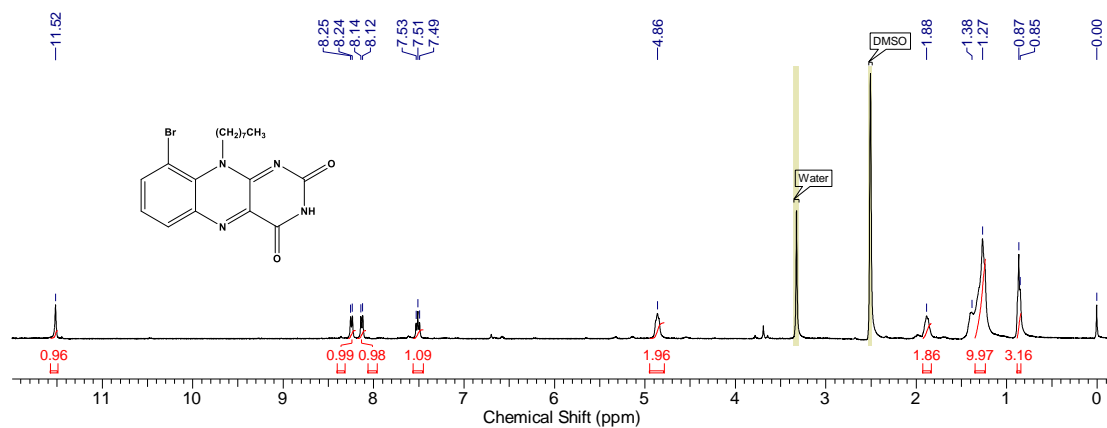

Figure S4-4.  $^1\text{H}$  NMR spectrum of MB-FL (400 MHz, DMSO- $d_6$ , 25 °C).

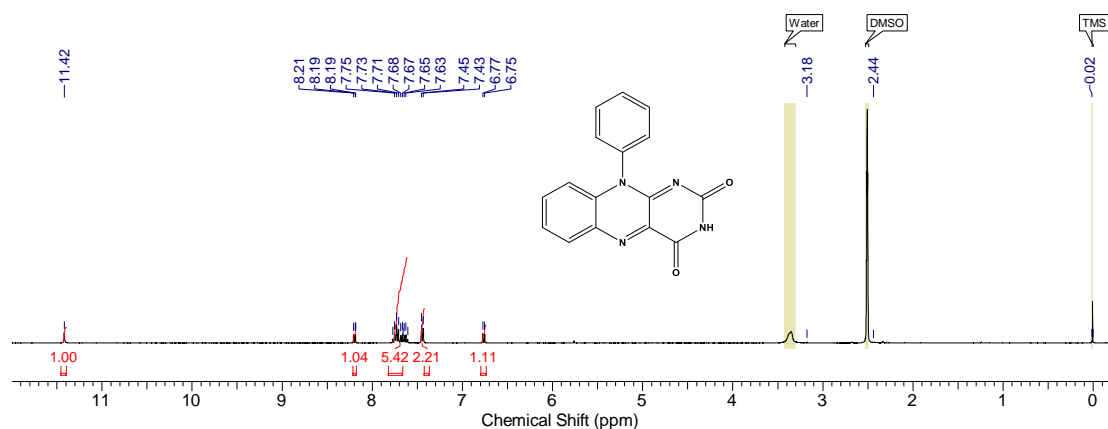

**Figure S4-5.** <sup>1</sup>H NMR spectrum of **Ph-FL** (400 MHz, DMSO-*d*<sub>6</sub>), 25 °C.

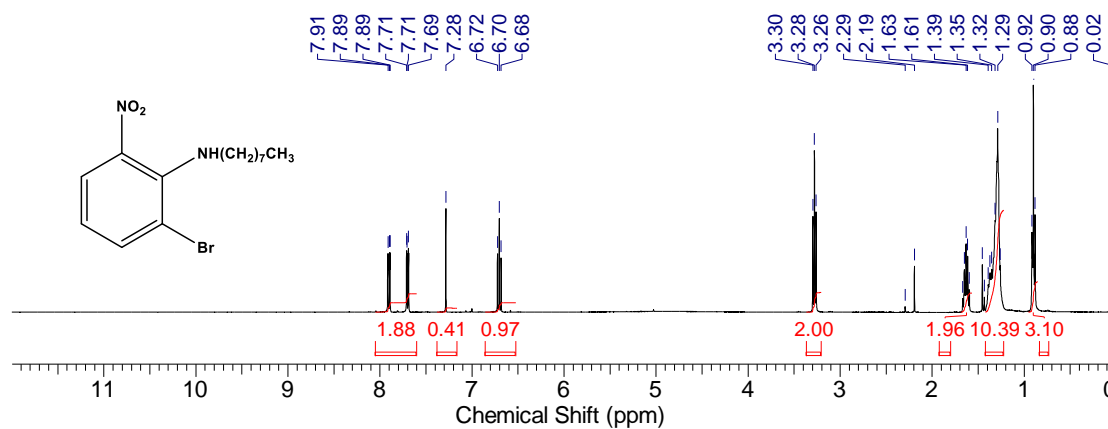

**Figure S4-6.** <sup>1</sup>H NMR spectrum of **2** (400 MHz, CDCl<sub>3</sub>), 25 °C.

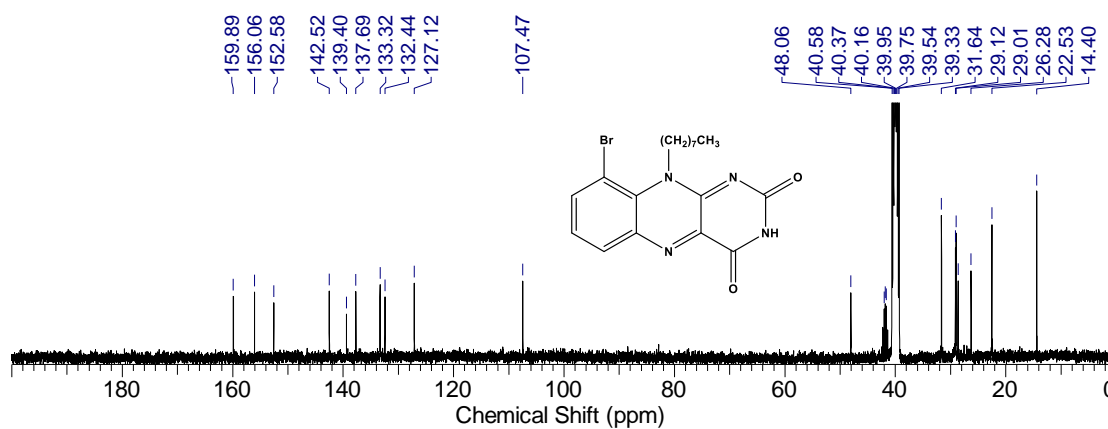

**Figure S4-7.** <sup>13</sup>C NMR spectrum of **2** (101 MHz, DMSO-*d*<sub>6</sub>), 25 °C.

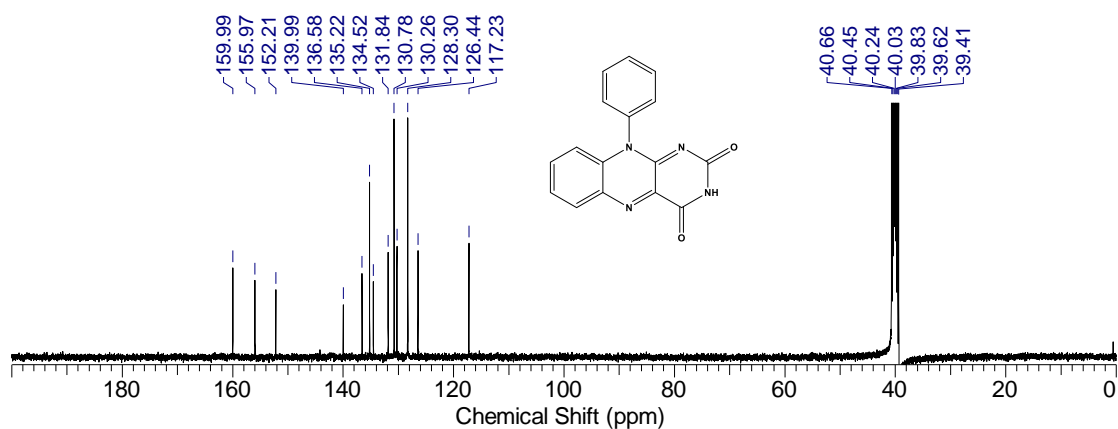

**Figure S4-8.**  $^{13}\text{C}$  NMR spectrum of **2** (101 MHz,  $\text{DMSO-}d_6$ ), 25 °C.

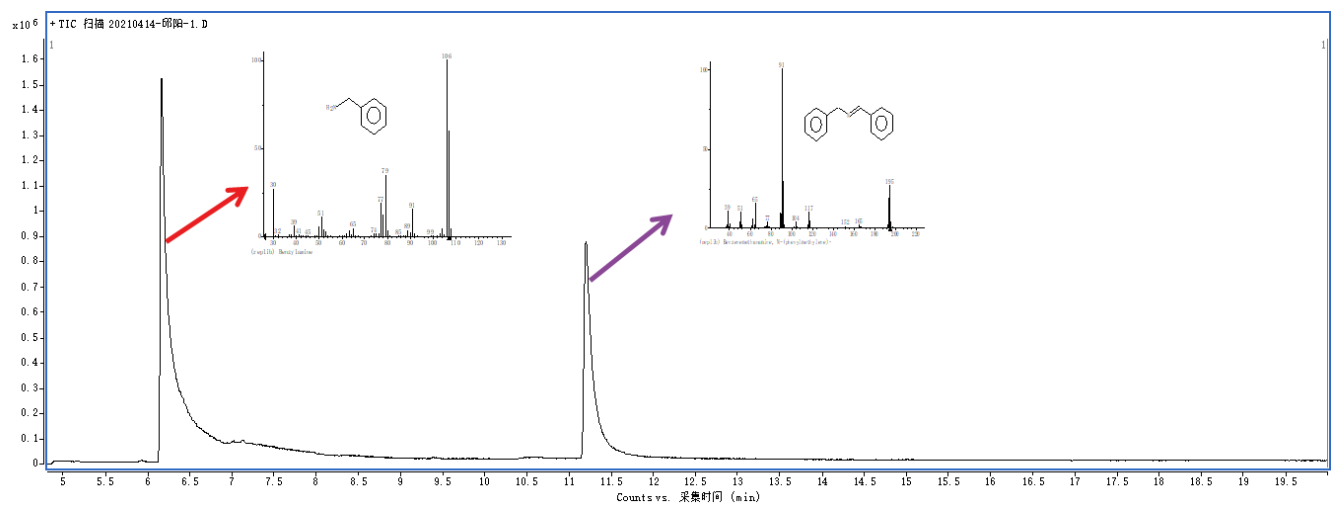

**Figure S4-9.** GC-MS spectra of benzoylamine catalyzed by FL photocatalysis.

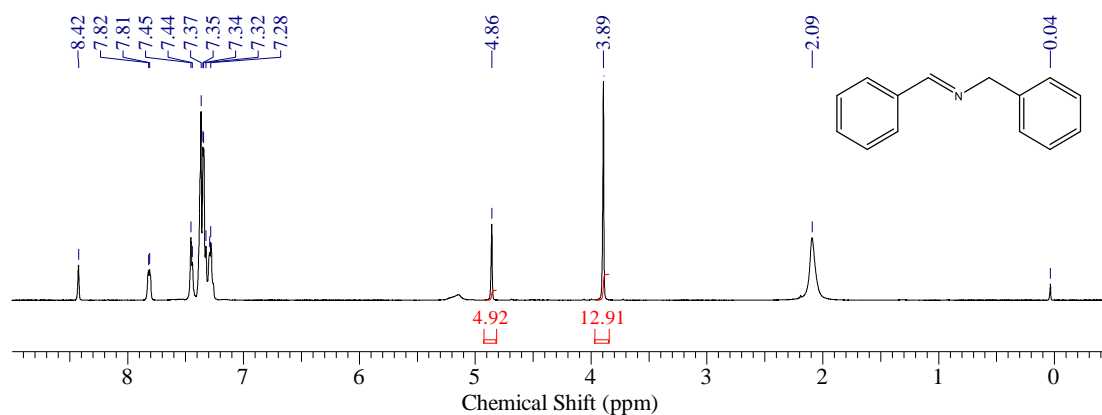

**Figure S4-10.**  $^1\text{H}$  NMR( $\text{CDCl}_3$ , 400 MHz), Photosensitizer: FL(0.2 mol%), Reaction solvent:  $\text{CH}_3\text{CN}$ , Reaction time: 9 h, Yield: 43 %.

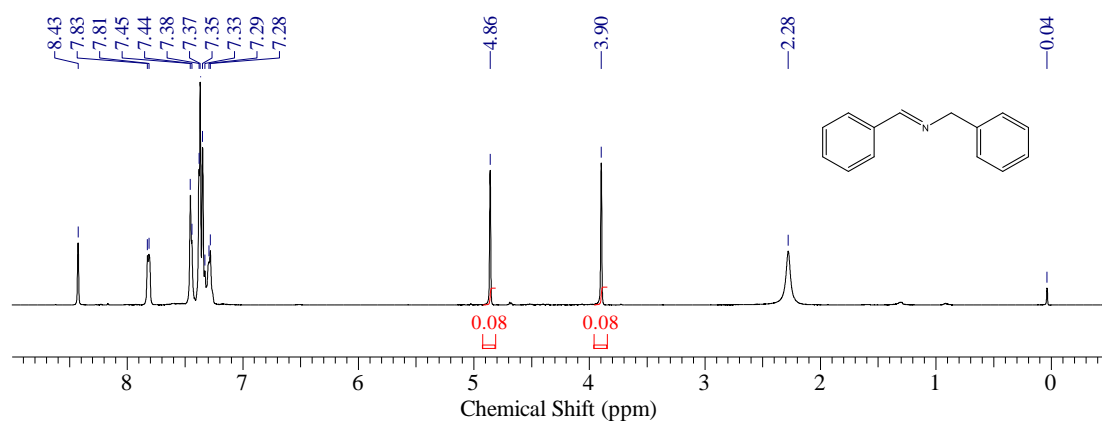

**Figure S4-11.**  $^1\text{H}$  NMR( $\text{CDCl}_3$ , 400MHz), Photosensitizer: FL(0.5 mol%), Reaction solvent:  $\text{CH}_3\text{CN}$ , Reaction time: 9 h, Yield: 67 %.

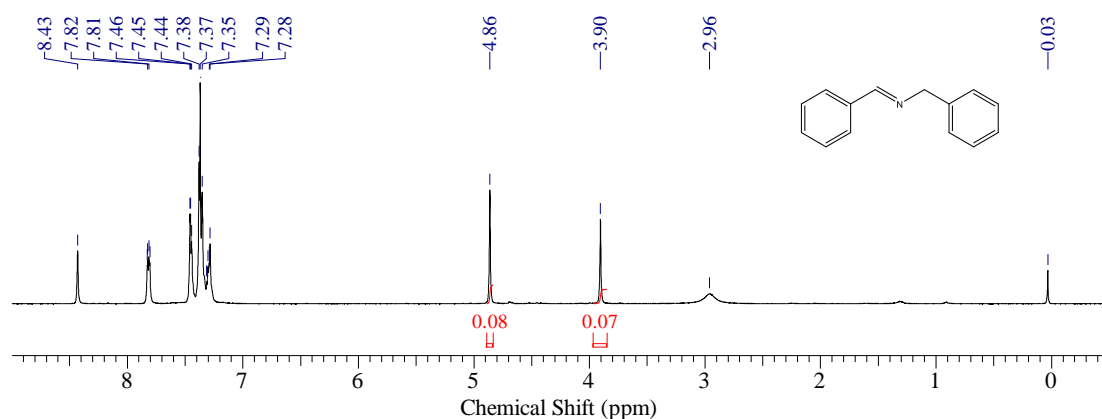

**Figure S4-12.**  $^1\text{H}$  NMR( $\text{CDCl}_3$ , 400 MHz), Photosensitizer: FL(1 mol%), Reaction solvent:  $\text{CH}_3\text{CN}$ , Reaction time: 9 h, Yield: 70 %.

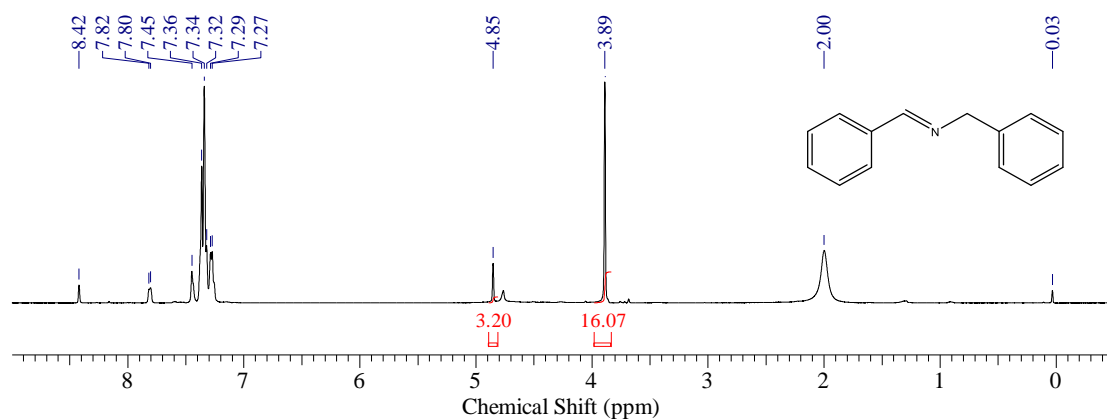

**Figure S4-13.**  $^1\text{H}$  NMR( $\text{CDCl}_3$ , 400 MHz), Photosensitizer: FL(0.5 mol%), Reaction solvent:  $\text{CH}_3\text{OH}$ , Reaction time: 9 h, Yield: 30 %.

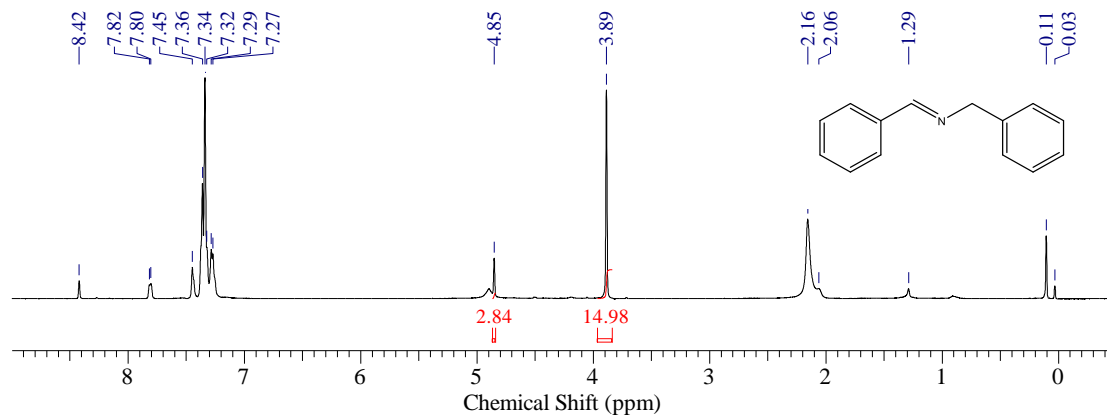

**Figure S4-14.**  $^1\text{H}$  NMR( $\text{CDCl}_3$ , 400 MHz), Photosensitizer: FL(0.5 mol%), Reaction solvent:  $\text{CH}_2\text{Cl}_2$ , Reaction time: 9 h, Yield: 24 %.

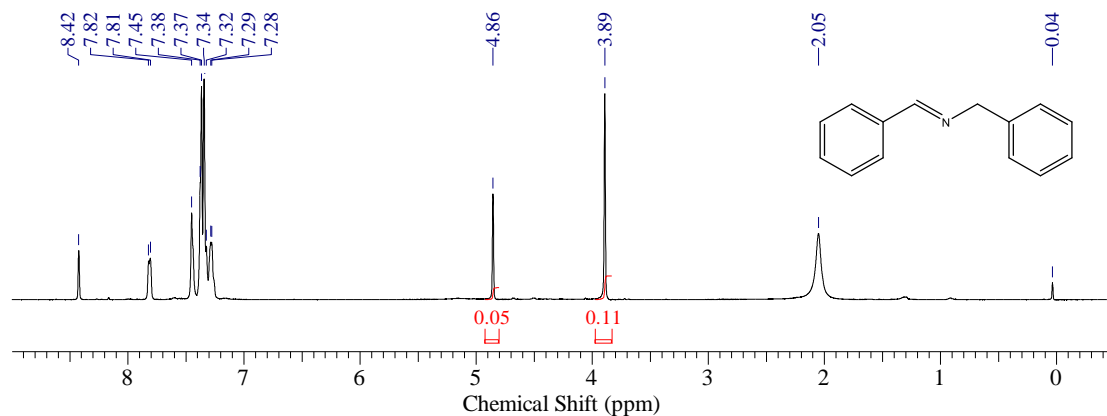

**Figure S4-15.**  $^1\text{H}$  NMR( $\text{CDCl}_3$ , 400 MHz), Photosensitizer: FL(0.5 mol%), Reaction solvent:  $\text{CH}_3\text{CN}:\text{CH}_3\text{OH}=9:1$  (v:v), Reaction time: 9 h, Yield: 48 %.

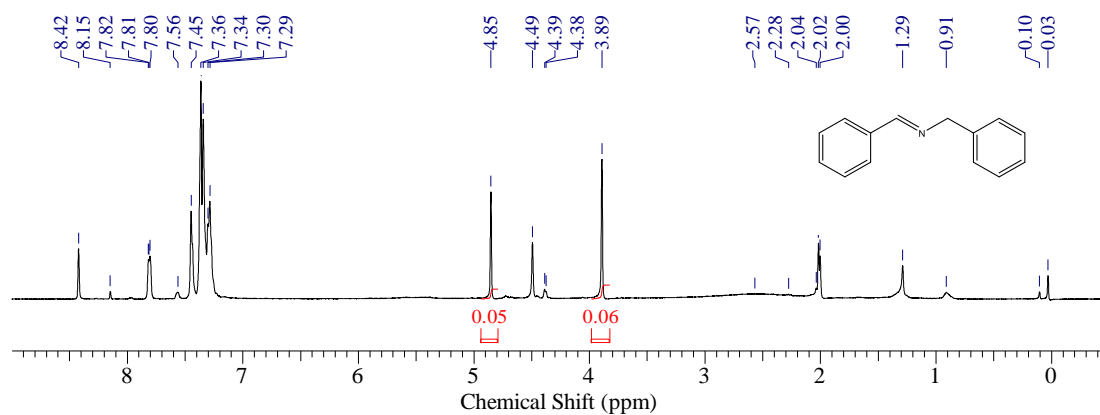

**Figure S4-16.**  $^1\text{H}$  NMR( $\text{CDCl}_3$ , 400 MHz), Photosensitizer: FL(0.5 mol%), Reaction solvent:  $\text{CH}_3\text{CN}:\text{H}_2\text{O} = 9:1(\text{v}:\text{v})$ , Reaction time: 9 h, Yield: 63 %.

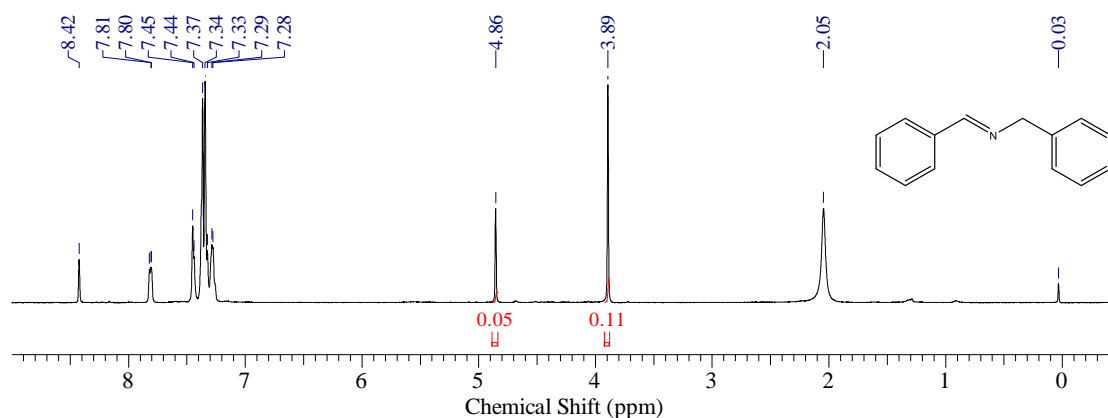

**Figure S4-17.**  $^1\text{H}$  NMR( $\text{CDCl}_3$ , 400 MHz), Photosensitizer: FL(0.5 mol%), Reaction solvent:  $\text{CH}_3\text{CN}$ , Reaction time: 3 h, Yield: 48 %.

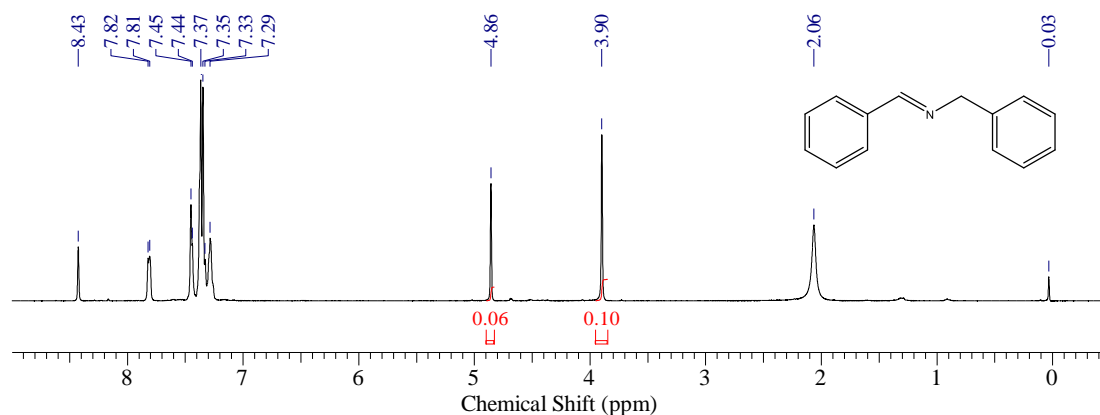

**Figure S4-18.**  $^1\text{H}$  NMR( $\text{CDCl}_3$ , 400 MHz), Photosensitizer: FL(0.5 mol%), Reaction solvent:  $\text{CH}_3\text{CN}$ , Reaction time: 5 h, Yield: 55 %.

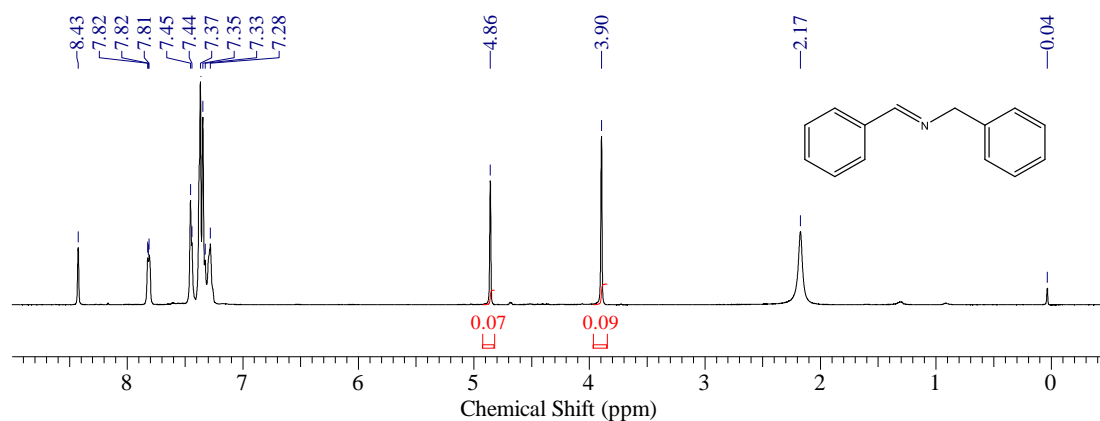

**Figure S4-19.**  $^1\text{H}$  NMR( $\text{CDCl}_3$ , 400 MHz), Photosensitizer: FL(0.5 mol%), Reaction solvent:  $\text{CH}_3\text{CN}$ , Reaction time:7 h, Yield: 61 %.

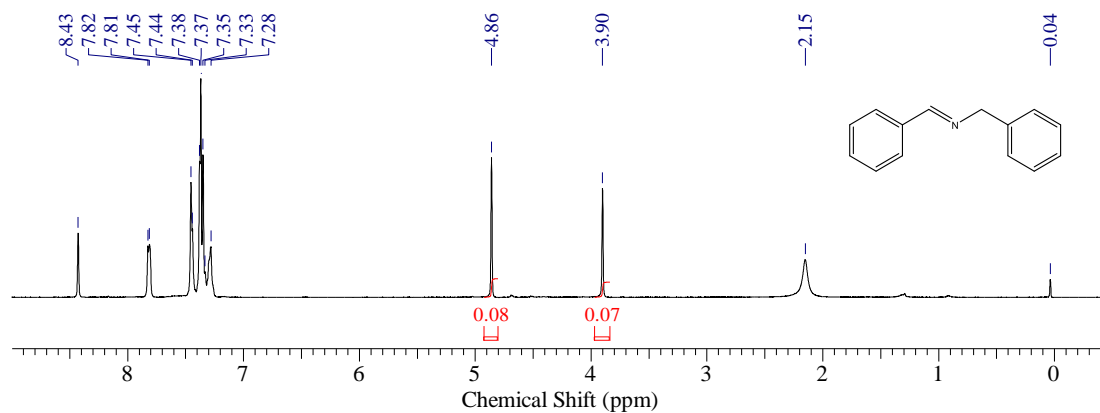

**Figure S4-20.**  $^1\text{H}$  NMR( $\text{CDCl}_3$ ,400 MHz), Photosensitizer: FL(0.5 mol%), Reaction solvent:  $\text{CH}_3\text{CN}$ , Reaction time:11 h, Yield:70 %.

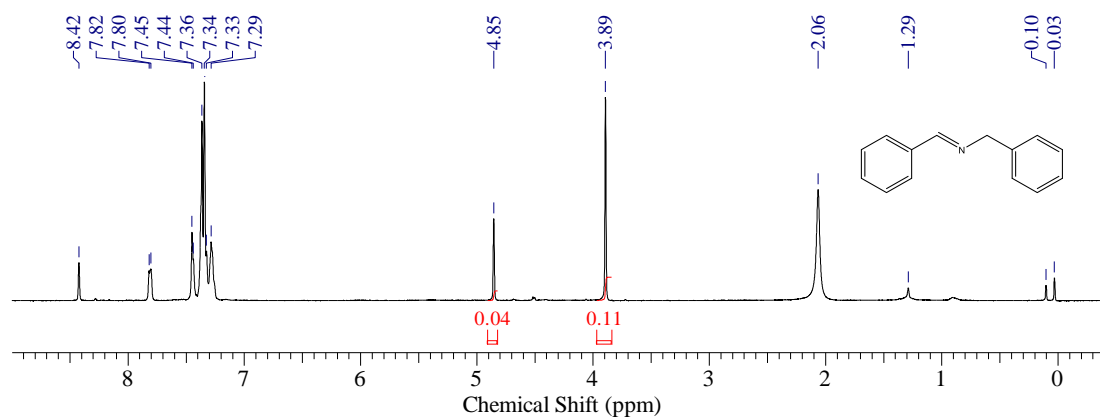

**Figure S4-21.**  $^1\text{H}$  NMR( $\text{CDCl}_3$ ,400 MHz), Photosensitizer: MB-FL (0.5 mol%), Reaction solvent:  $\text{CH}_2\text{Cl}_2$ , Reaction time: 9 h, Yield: 42 %.



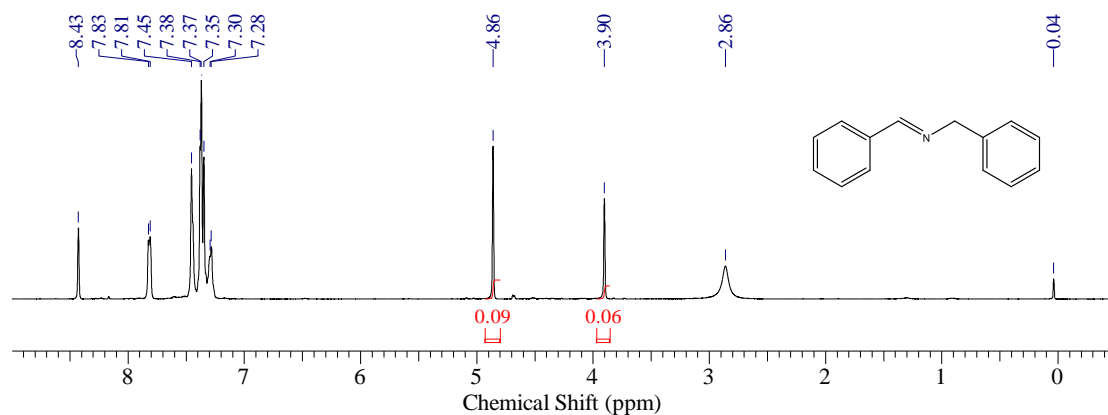

**Figure S4-22.**  $^1\text{H}$  NMR( $\text{CDCl}_3$ , 400 MHz), Photosensitizer: MB-FL (0.5 mol%), Reaction solvent:  $\text{CH}_3\text{CN}$ , Reaction time: 9 h, Yield: 75 %.

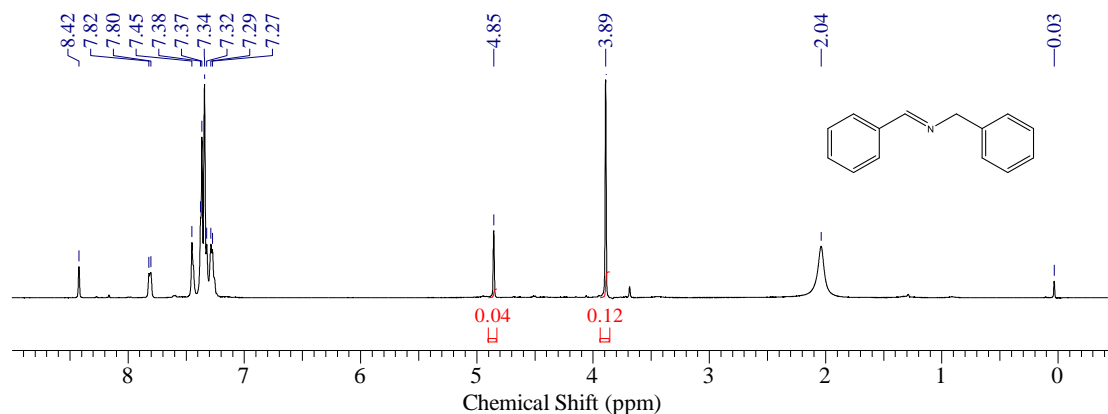

**Figure S4-23.**  $^1\text{H}$  NMR( $\text{CDCl}_3$ , 400 MHz), Photosensitizer: MB-FL (0.5 mol%), Reaction solvent:  $\text{CH}_3\text{OH}$ , Reaction time: 9 h, Yield: 40 %.

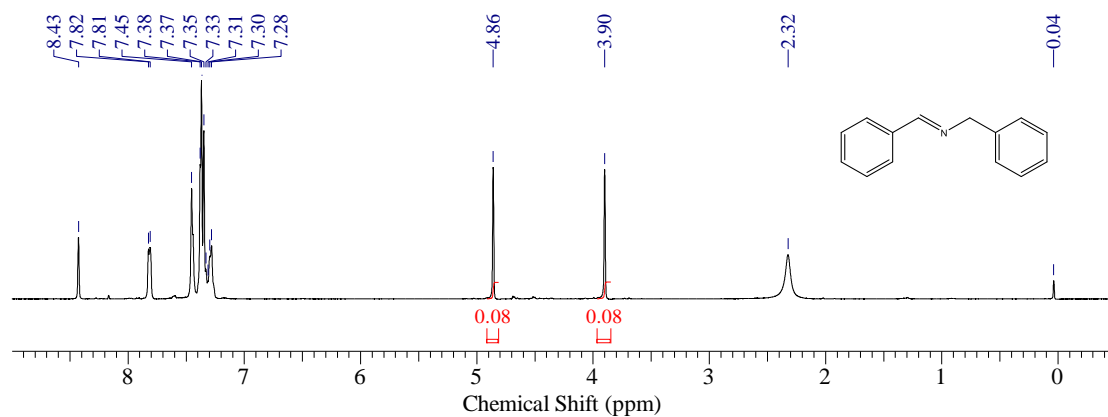

**Figure S4-24.**  $^1\text{H}$  NMR( $\text{CDCl}_3$ , 400 MHz), Photosensitizer: MB-FL (0.5 mol%), Reaction solvent:  $\text{CH}_3\text{CN} : \text{CH}_3\text{OH} = 9:1$  (v:v), Reaction time: 9 h, Yield: 67 %.

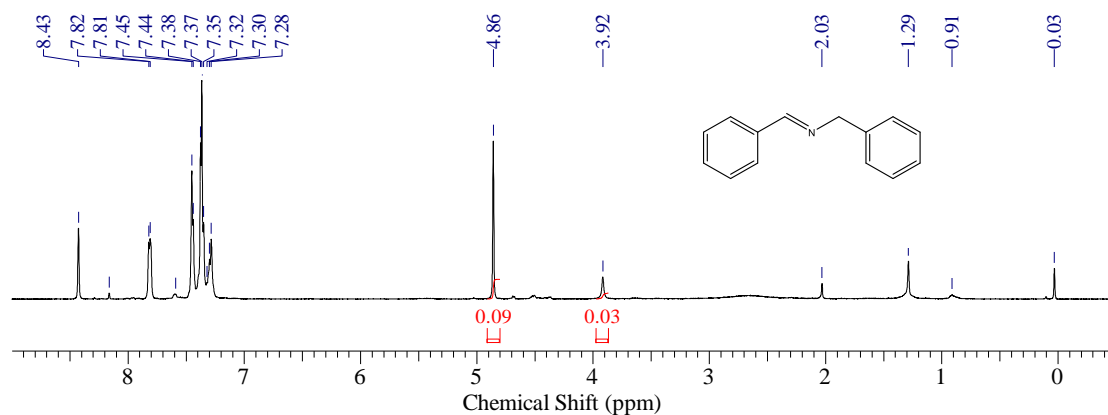

**Figure S4-25.**  $^1\text{H}$  NMR( $\text{CDCl}_3$ , 400 MHz), Photosensitizer: MB-FL (0.5 mol%), Reaction solvent:  $\text{CH}_3\text{CN}:\text{H}_2\text{O} = 9:1(\text{v}:\text{v})$ , Reaction time: 9 h, Yield: 86 %.

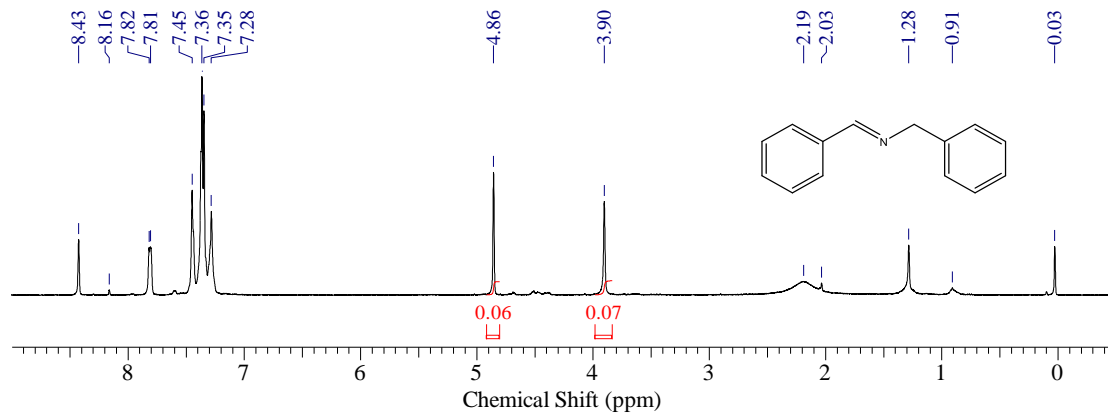

**Figure S4-26.**  $^1\text{H}$  NMR( $\text{CDCl}_3$ , 400 MHz), Photosensitizer: MB-FL (0.5 mol%), Reaction solvent:  $\text{CH}_3\text{CN}:\text{H}_2\text{O} = 9:1(\text{v}:\text{v})$ , Reaction time: 3 h, Yield: 63 %.

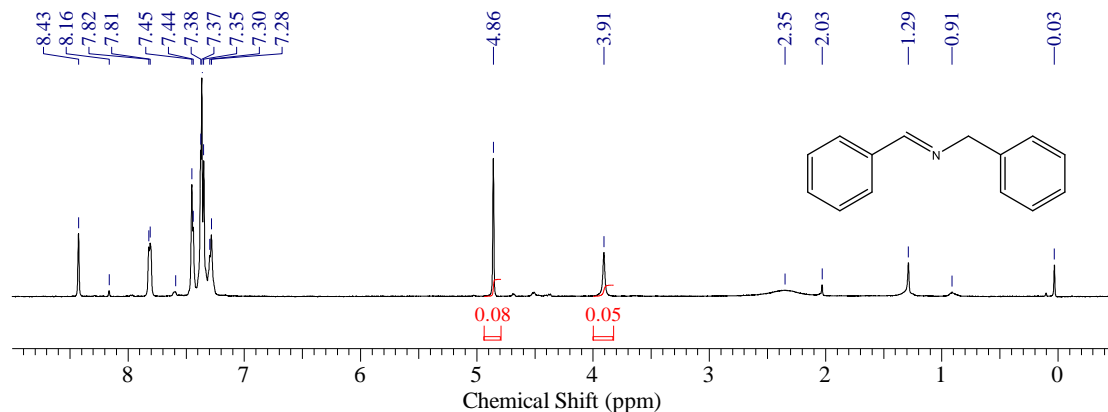

**Figure S4-27.**  $^1\text{H}$  NMR( $\text{CDCl}_3$ , 400 MHz), Photosensitizer: MB-FL (0.5 mol%), Reaction solvent:  $\text{CH}_3\text{CN}:\text{H}_2\text{O} = 9:1(\text{v}:\text{v})$ , Reaction time: 5 h, Yield: 76 %.

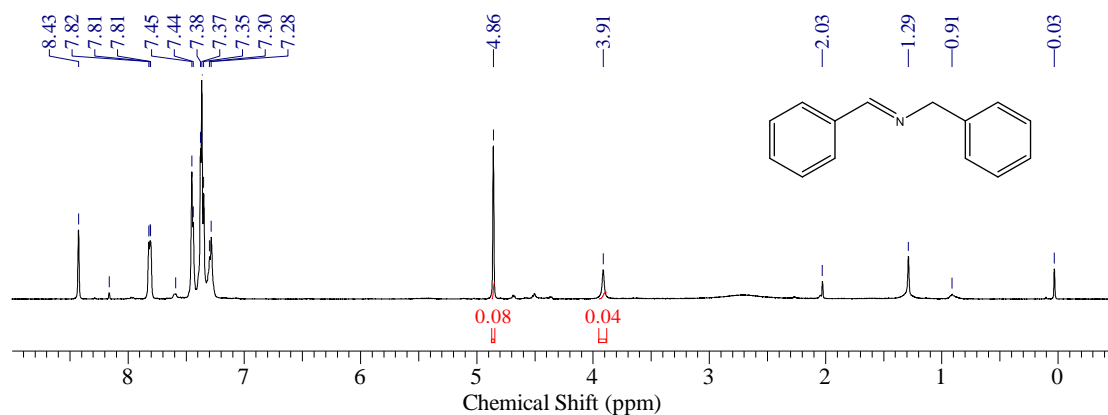

**Figure S4-28.**  $^1\text{H}$  NMR( $\text{CDCl}_3$ , 400 MHz), Photosensitizer: MB-FL (0.5 mol%), Reaction solvent:  $\text{CH}_3\text{CN}:\text{H}_2\text{O} = 9:1$ (v:v), Reaction time: 7 h, Yield: 80 %.

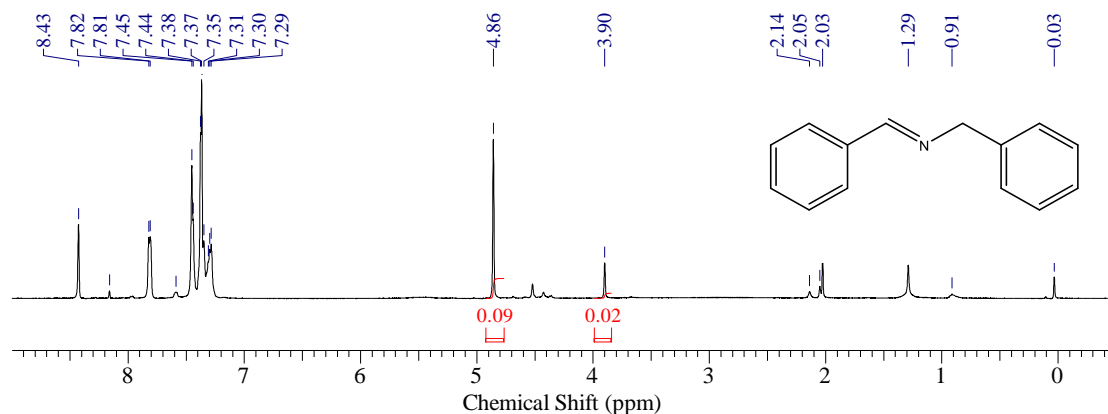

**Figure S4-29.**  $^1\text{H}$  NMR( $\text{CDCl}_3$ , 400 MHz), Photosensitizer: MB-FL (0.5 mol%), Reaction solvent:  $\text{CH}_3\text{CN}:\text{H}_2\text{O} = 9:1$ (v:v), Reaction time: 11 h, Yield: 90 %.

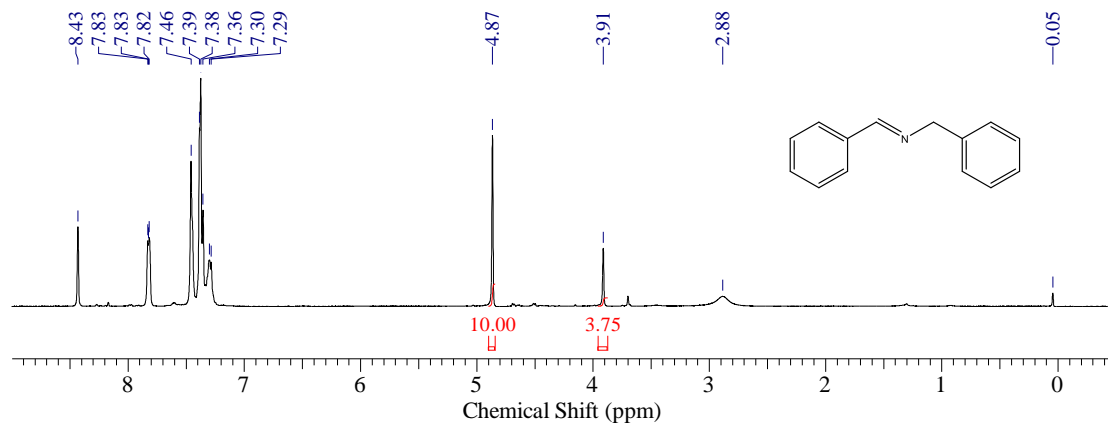

**Figure S4-30.**  $^1\text{H}$  NMR( $\text{CDCl}_3$ , 400 MHz), Photosensitizer: DB-FL (0.5 mol%), Reaction solvent:  $\text{CH}_3\text{OH}$ , Reaction time: 7 h, Yield: 84 %.

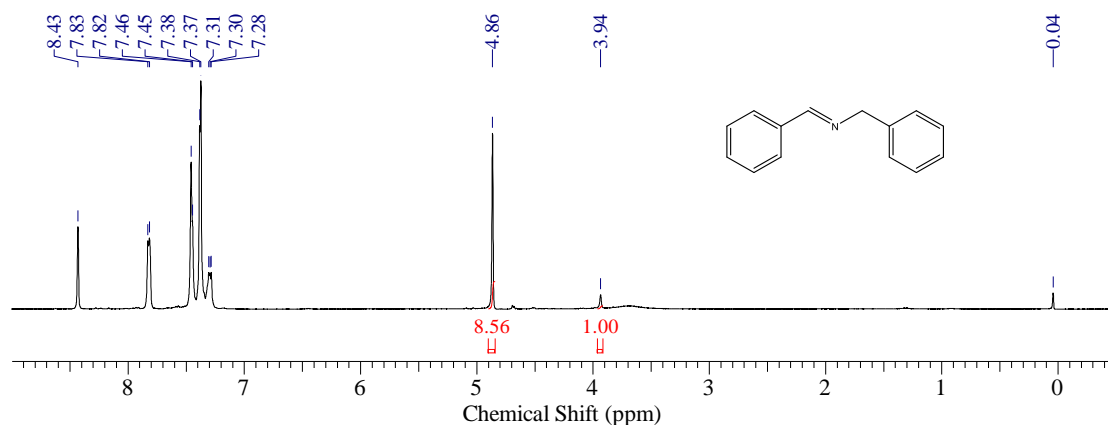

**Figure S4-31.**  $^1\text{H}$  NMR( $\text{CDCl}_3$ , 400 MHz), Photosensitizer: DB-FL (0.5 mol%), Reaction solvent:  $\text{CH}_3\text{CN}$ , Reaction time: 7 h, Yield: 94 %.

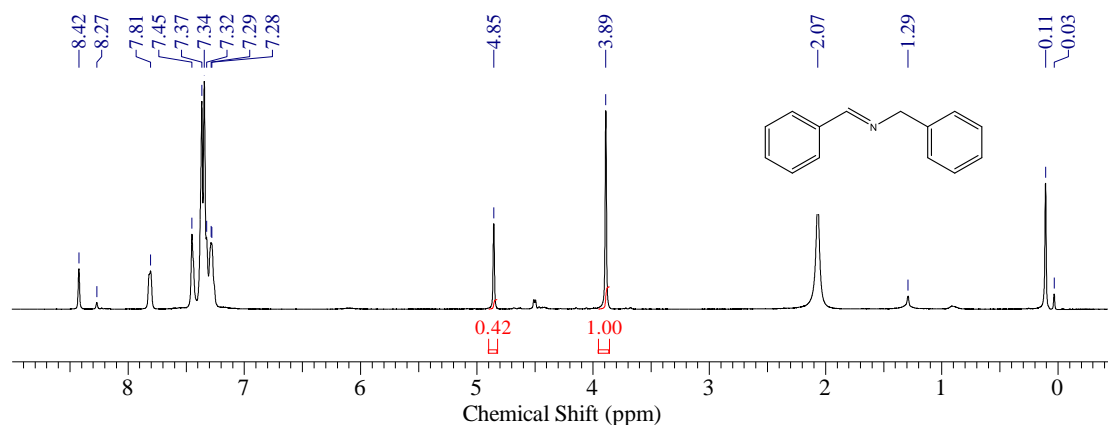

**Figure S4-32.**  $^1\text{H}$  NMR( $\text{CDCl}_3$ , 400 MHz), Photosensitizer: DB-FL (0.5 mol%), Reaction solvent:  $\text{CH}_2\text{Cl}_2$ , Reaction time: 7 h, Yield: 46 %.

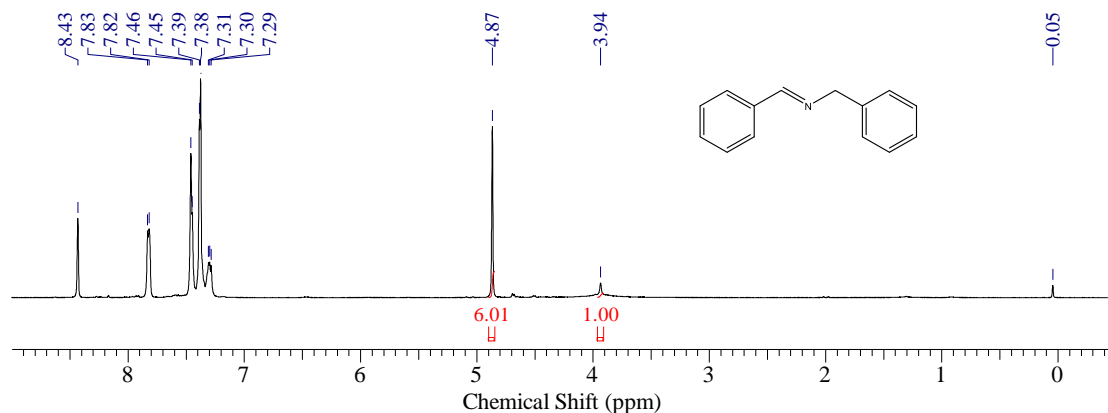

**Figure S4-33.**  $^1\text{H}$  NMR( $\text{CDCl}_3$ , 400 MHz), Photosensitizer: DB-FL (0.5 mol%), Reaction solvent:  $\text{CH}_3\text{CN}:\text{CH}_3\text{OH}=9:1$ (v:v), Reaction time: 7 h, Yield: 92 %.

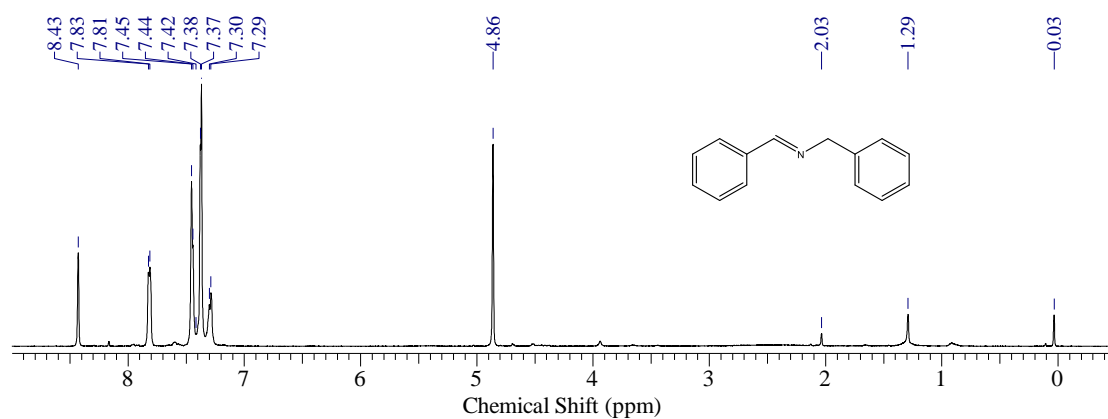

**Figure S4-34.**  $^1\text{H}$  NMR( $\text{CDCl}_3$ , 400 MHz), Photosensitizer: DB-FL (0.5 mol%), Reaction solvent:  $\text{CH}_3\text{CN}:\text{H}_2\text{O}=9:1(\text{v}:\text{v})$ , Reaction time: 7 h, Yield: 100 %.

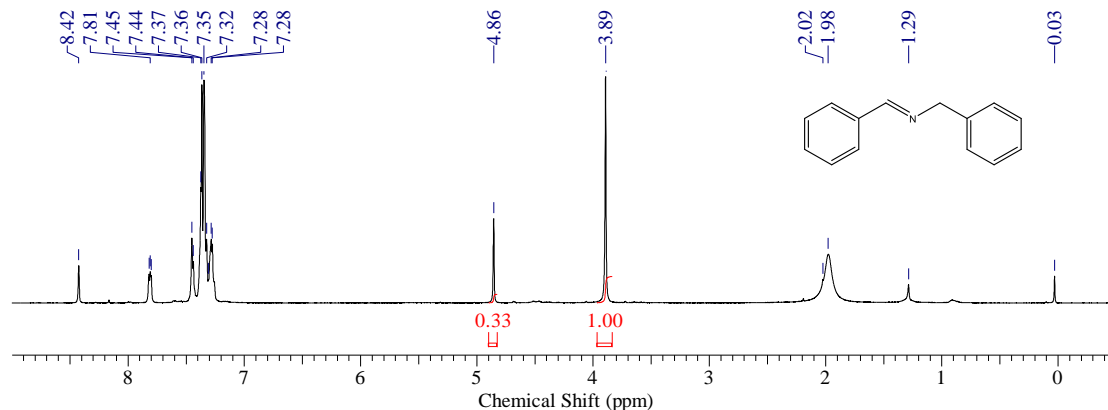

**Figure S4-35.**  $^1\text{H}$  NMR( $\text{CDCl}_3$ , 400 MHz), Photosensitizer: DB-FL (0.5 mol%), Reaction solvent:  $\text{CH}_3\text{CN}:\text{H}_2\text{O}=9:1(\text{v}:\text{v})$ , Reaction time: 1 h, Yield: 40 %.

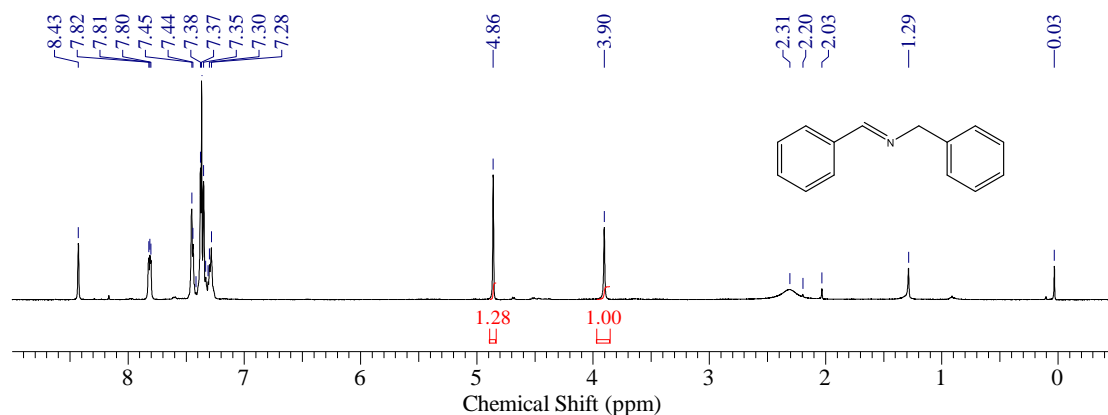

**Figure S4-36.**  $^1\text{H}$  NMR( $\text{CDCl}_3$ , 400 MHz), Photosensitizer: DB-FL (0.5 mol%), Reaction solvent:  $\text{CH}_3\text{CN}:\text{H}_2\text{O}=9:1(\text{v}:\text{v})$ , Reaction time: 3 h, Yield: 72 %.

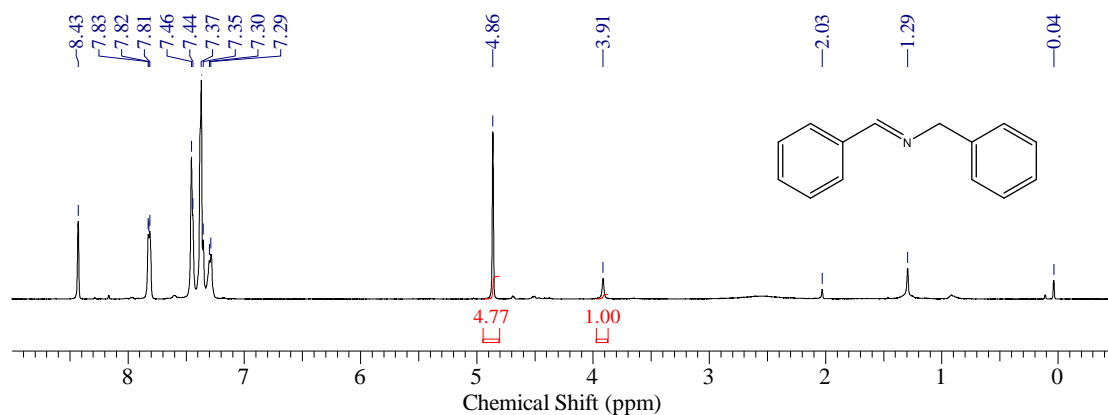

**Figure S4-37.**  $^1\text{H}$  NMR( $\text{CDCl}_3$ , 400 MHz), Photosensitizer: DB-FL (0.5 mol%), Reaction solvent:  $\text{CH}_3\text{CN}:\text{H}_2\text{O}=9:1(\text{v}:\text{v})$ , Reaction time: 5 h, Yield: 91 %.

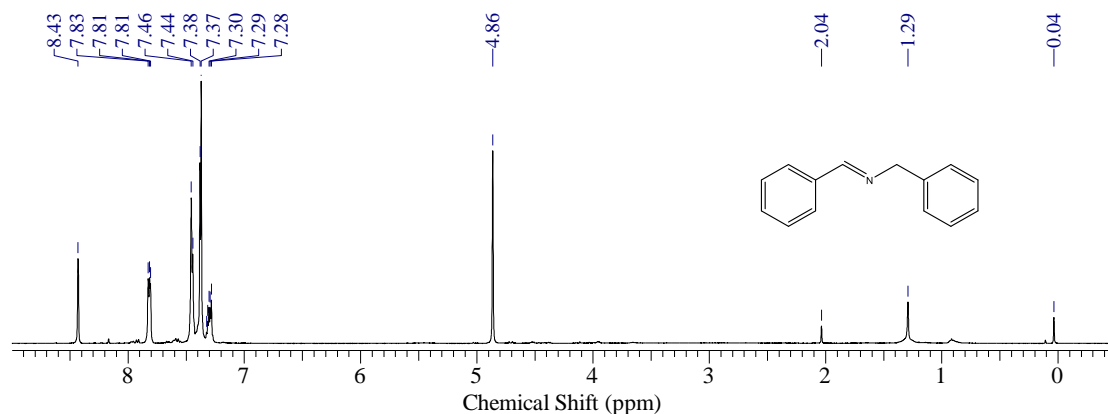

**Figure S4-38.**  $^1\text{H}$  NMR( $\text{CDCl}_3$ , 400 MHz), Photosensitizer: DB-FL (0.5 mol%), Reaction solvent:  $\text{CH}_3\text{CN}:\text{H}_2\text{O}=9:1(\text{v}:\text{v})$ , Reaction time: 9 h, Yield: 100 %.

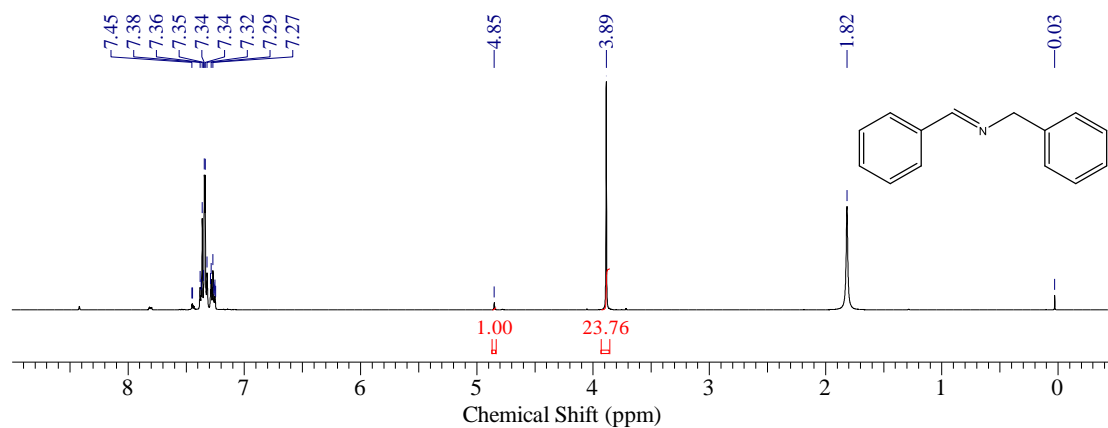

**Figure S4-39.**  $^1\text{H}$  NMR( $\text{CDCl}_3$ , 400 MHz), Photosensitizer: Ph-FL (0.5 mol%), Reaction solvent:  $\text{CH}_3\text{OH}$ , Reaction time: 9 h, Yield: 8 %.

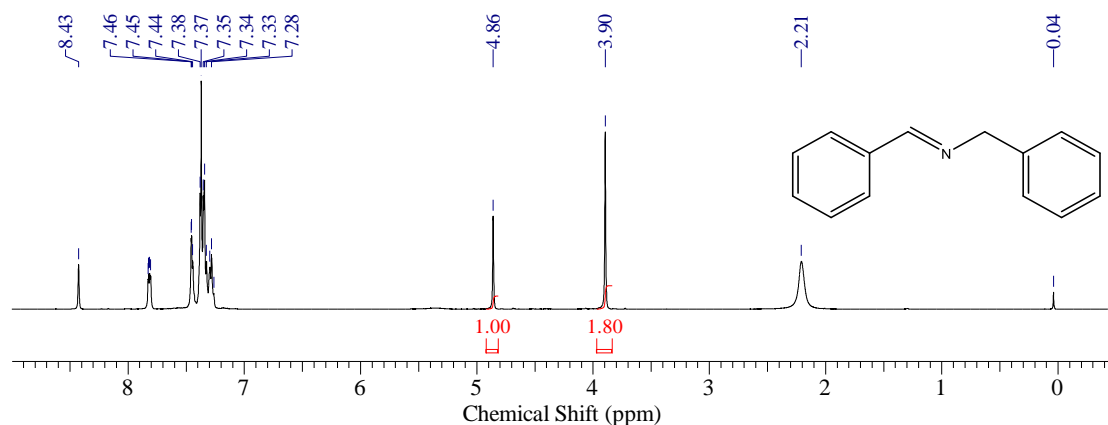

**Figure S4-40.**  $^1\text{H}$  NMR( $\text{CDCl}_3$ , 400 MHz), Photosensitizer: Ph-FL (0.5 mol%), Reaction solvent:  $\text{CH}_3\text{CN}$ , Reaction time: 9 h, Yield: 53 %.

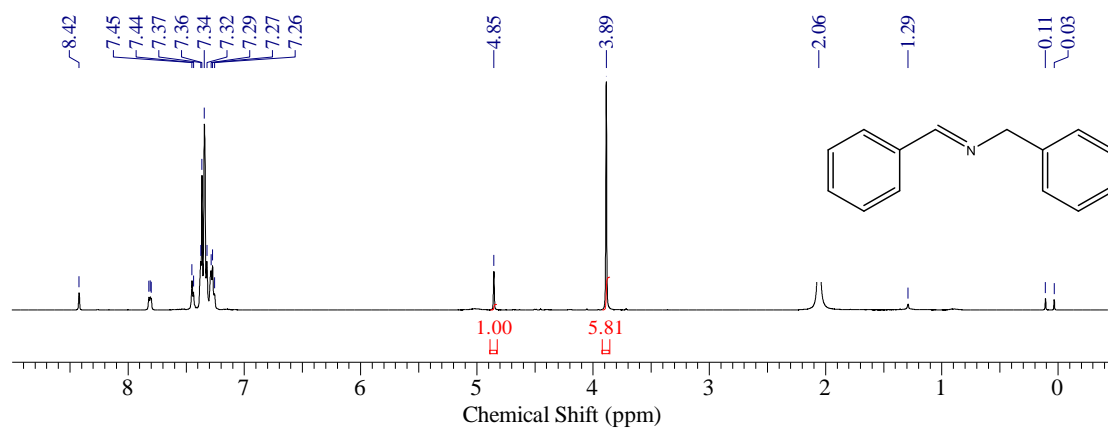

**Figure S4-41.**  $^1\text{H}$  NMR( $\text{CDCl}_3$ , 400 MHz), Photosensitizer: Ph-FL (0.5 mol%), Reaction solvent:  $\text{CH}_2\text{Cl}_2$ , Reaction time: 9 h, Yield: 26 %.

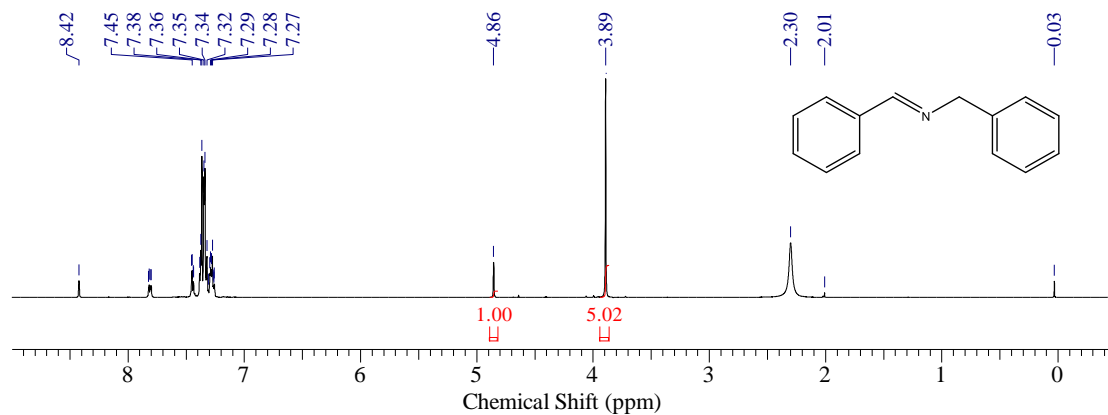

**Figure S4-42.**  $^1\text{H}$  NMR( $\text{CDCl}_3$ , 400 MHz), Photosensitizer: Ph-FL (0.5 mol%), Reaction solvent:  $\text{CH}_3\text{CN}:\text{CH}_3\text{OH} = 9:1$  (v:v), Reaction time: 9 h, Yield: 28 %.

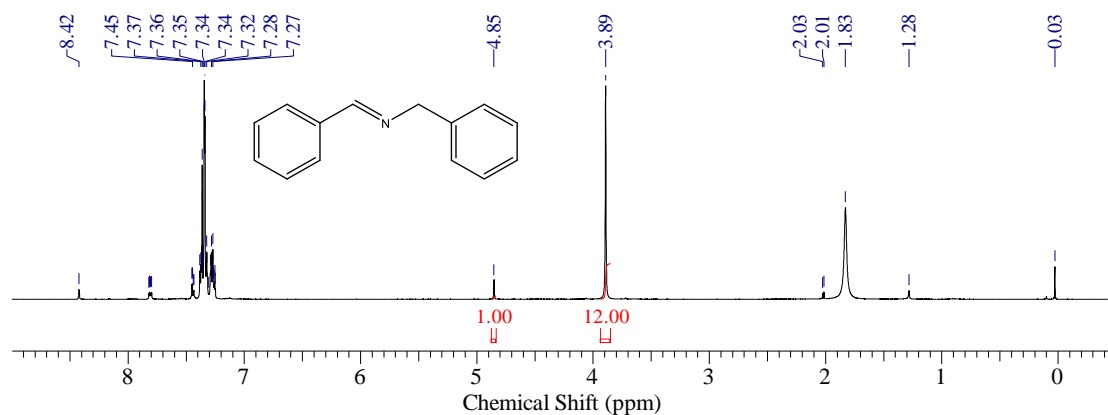

**Figure S4-43.**  $^1\text{H}$  NMR( $\text{CDCl}_3$ , 400 MHz), Photosensitizer: Ph-FL (0.5 mol%), Reaction solvent:  $\text{CH}_3\text{CN}:\text{H}_2\text{O} = 9:1(\text{v}:\text{v})$ , Reaction time: 9 h, Yield: 14 %.

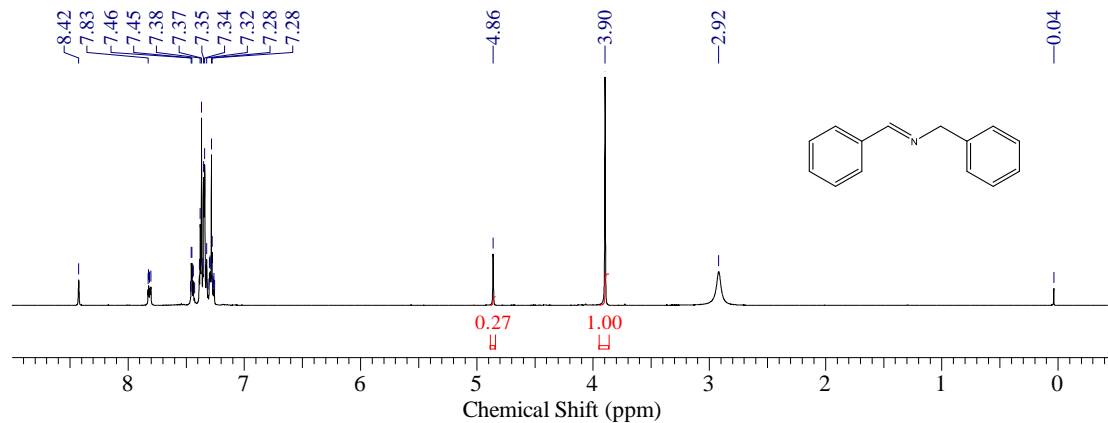

**Figure S4-44.**  $^1\text{H}$  NMR( $\text{CDCl}_3$ , 400 MHz), Photosensitizer: Ph-FL (0.5 mol%), Reaction solvent:  $\text{CH}_3\text{CN}$ , Reaction time: 3 h, Yield: 35 %.

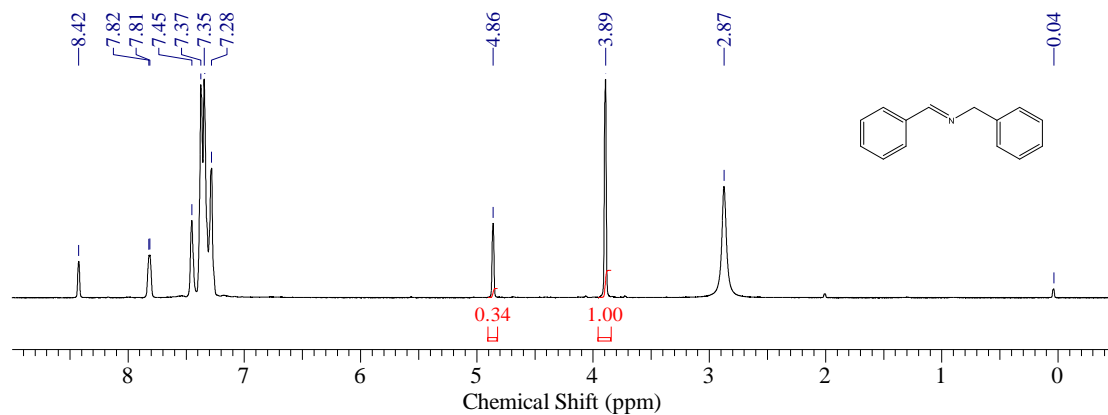

**Figure S4-45.**  $^1\text{H}$  NMR( $\text{CDCl}_3$ , 400 MHz), Photosensitizer: Ph-FL (0.5 mol%), Reaction solvent:  $\text{CH}_3\text{CN}$ , Reaction time: 5 h, Yield: 40 %.



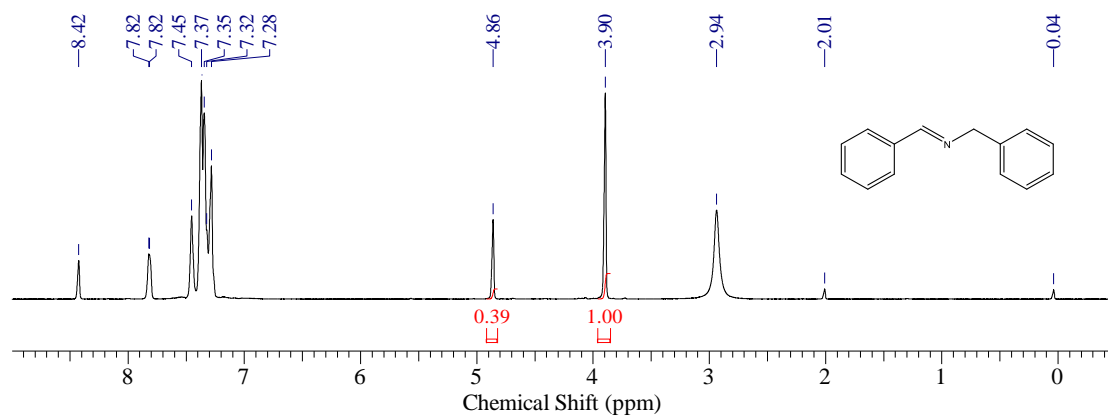

**Figure S4-46.**  $^1\text{H}$  NMR( $\text{CDCl}_3$ , 400 MHz), Photosensitizer: Ph-FL (0.5 mol%), Reaction solvent:  $\text{CH}_3\text{CN}$ , Reaction time: 7 h, Yield: 44 %.

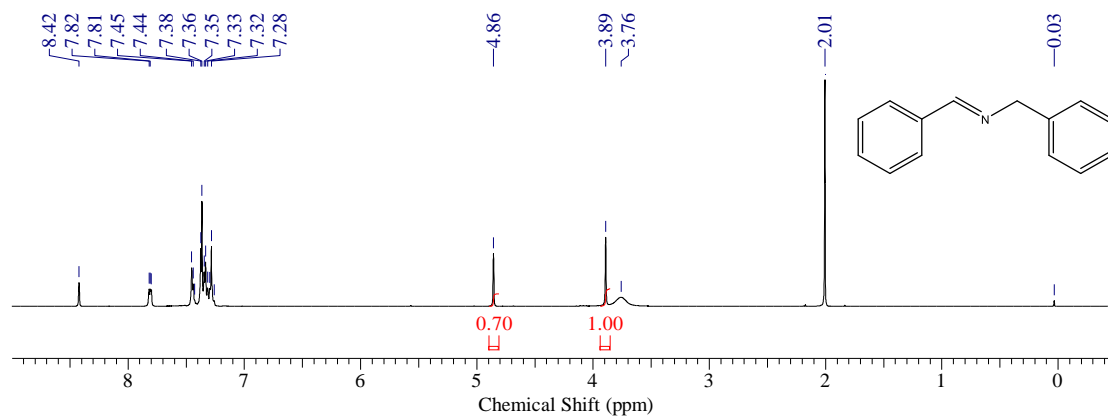

**Figure S4-47.**  $^1\text{H}$  NMR( $\text{CDCl}_3$ , 400 MHz), Photosensitizer: Ph-FL (0.5 mol%), Reaction solvent:  $\text{CH}_3\text{CN}$ , Reaction time: 11 h, Yield: 58 %.

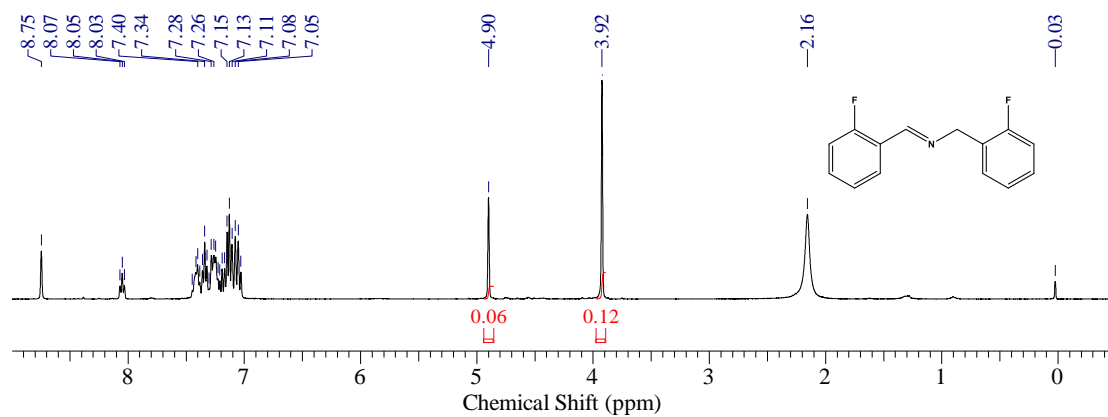

**Figure S4-48.**  $^1\text{H}$  NMR( $\text{CDCl}_3$ , 400 MHz), Photosensitizer: FL(0.5 mol%), Reaction solvent:  $\text{CH}_3\text{CN}$ , Reaction time: 9 h, Yield: 50 %.

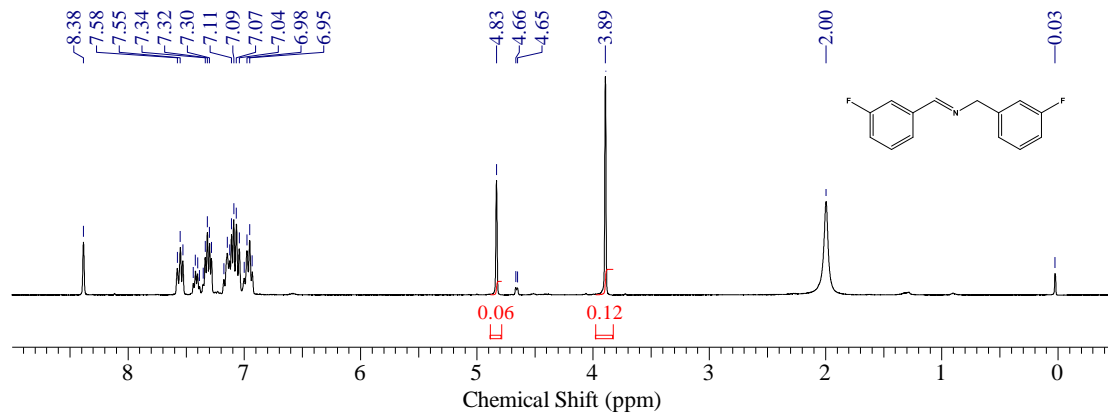

**Figure S4-49.**  $^1\text{H}$  NMR( $\text{CDCl}_3$ , 400 MHz), Photosensitizer: FL(0.5 mol%), Reaction solvent:  $\text{CH}_3\text{CN}$ , Reaction time: 9 h, Yield: 50 %.

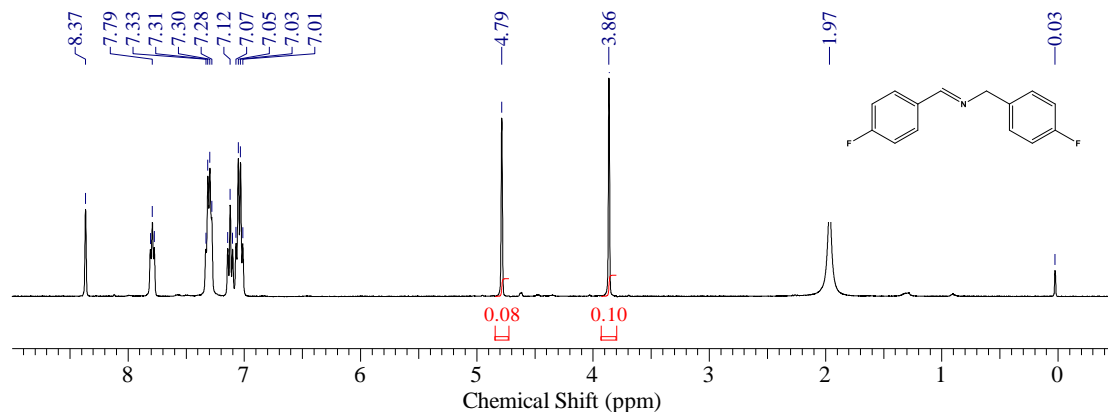

**Figure S4-50.**  $^1\text{H}$  NMR( $\text{CDCl}_3$ , 400 MHz), Photosensitizer: FL(0.5 mol%), Reaction solvent:  $\text{CH}_3\text{CN}$ , Reaction time: 9 h, Yield: 62 %.

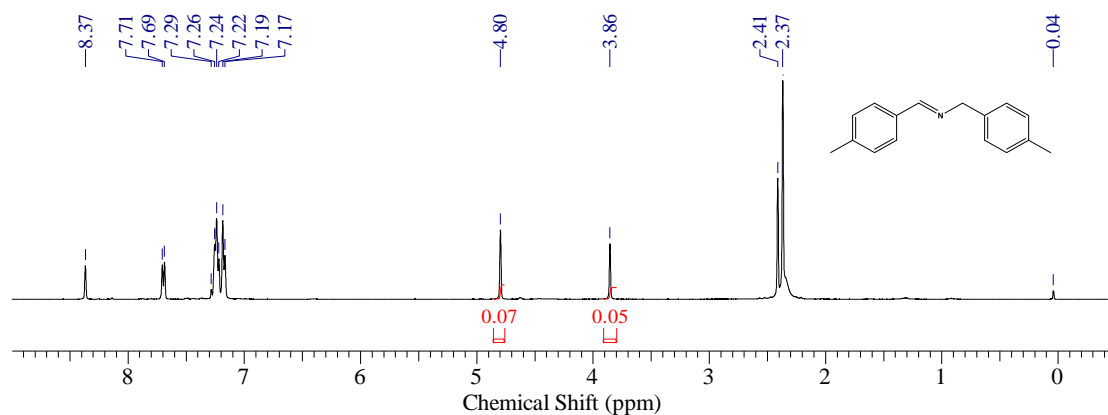

**Figure S4-51.**  $^1\text{H}$  NMR( $\text{CDCl}_3$ , 400 MHz), Photosensitizer: FL(0.5 mol%), Reaction solvent:  $\text{CH}_3\text{CN}$ , Reaction time: 9 h, Yield: 74 %.

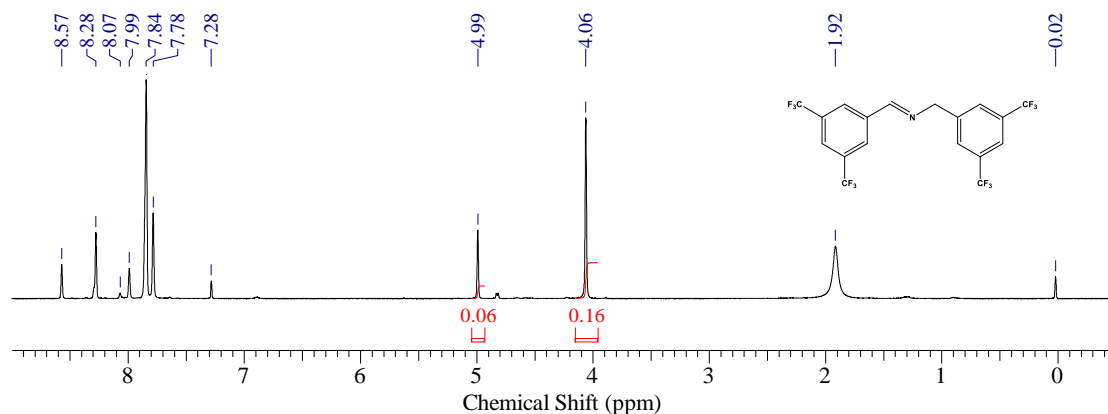

**Figure S4-52.**  $^1\text{H}$  NMR( $\text{CDCl}_3$ , 400 MHz), Photosensitizer: FL(0.5 mol%), Reaction solvent:  $\text{CH}_3\text{CN}$ , Reaction time: 9 h, Yield: 43 %.

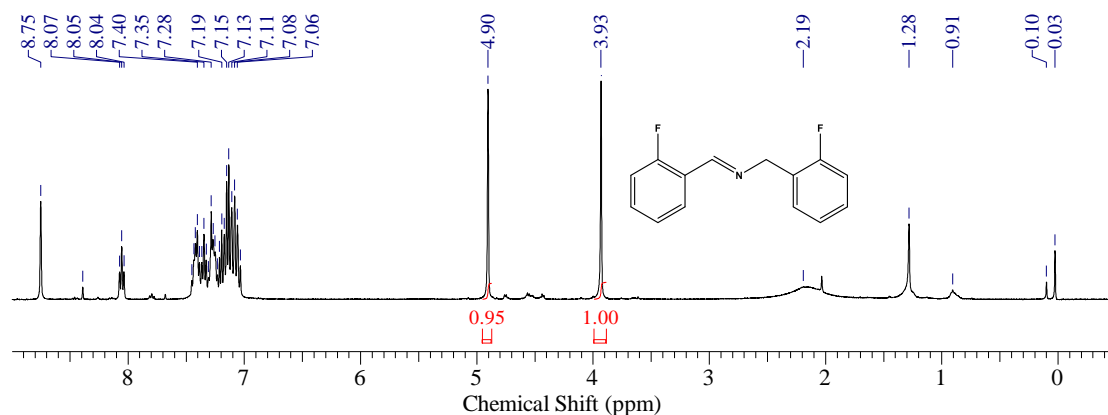

**Figure S4-53.**  $^1\text{H}$  NMR( $\text{CDCl}_3$ , 400 MHz), Photosensitizer: MB-FL (0.5 mol%), Reaction solvent:  $\text{CH}_3\text{CN}:\text{H}_2\text{O}=9:1(\text{v}:\text{v})$ , Reaction time: 9 h, Yield: 66 %.

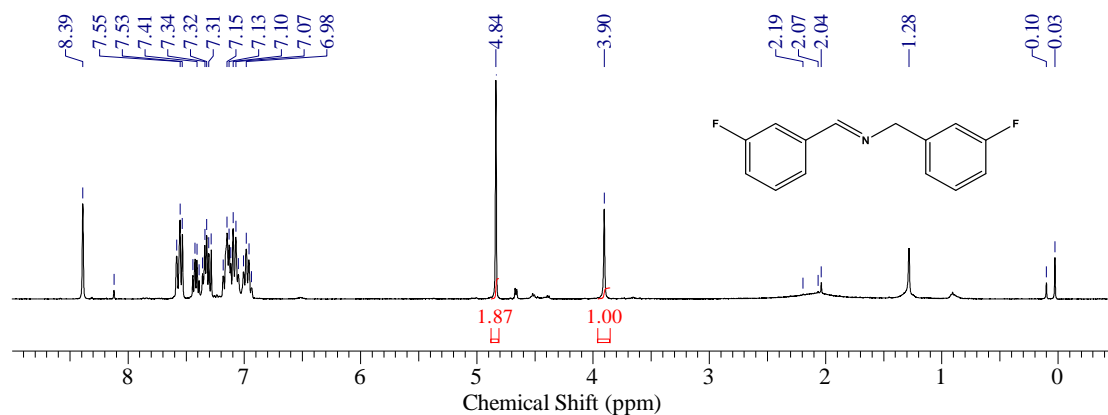

**Figure S4-54.**  $^1\text{H}$  NMR( $\text{CDCl}_3$ , 400 MHz), Photosensitizer: MB-FL (0.5 mol%), Reaction solvent:  $\text{CH}_3\text{CN}:\text{H}_2\text{O} = 9:1(\text{v}:\text{v})$ , Reaction time: 9 h, Yield: 79 %.

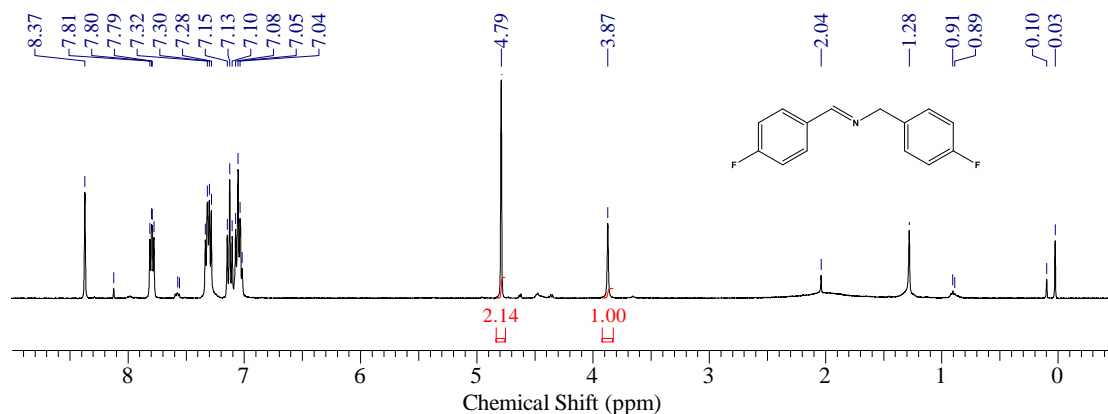

**Figure S4-55.**  $^1\text{H}$  NMR( $\text{CDCl}_3$ , 400 MHz), Photosensitizer: MB-FL (0.5 mol%), Reaction solvent:  $\text{CH}_3\text{CN}:\text{H}_2\text{O} = 9:1(\text{v}:\text{v})$ , Reaction time: 9 h, Yield: 81 %.

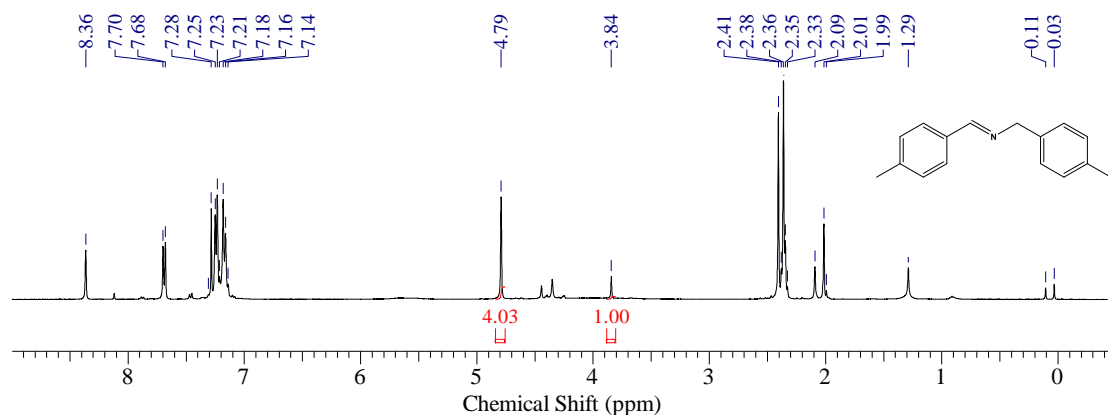

**Figure S4-56.**  $^1\text{H}$  NMR( $\text{CDCl}_3$ , 400 MHz), Photosensitizer: MB-FL (0.5 mol%), Reaction solvent:  $\text{CH}_3\text{CN}:\text{H}_2\text{O} = 9:1(\text{v}:\text{v})$ , Reaction time: 9 h, Yield: 89 %.

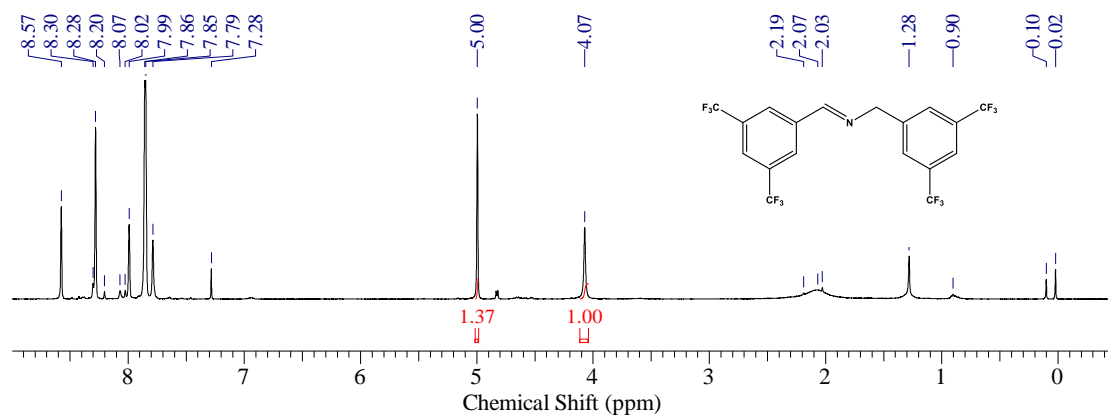

**Figure S4-57.**  $^1\text{H}$  NMR( $\text{CDCl}_3$ , 400 MHz), Photosensitizer: MB-FL (0.5 mol%), Reaction solvent:  $\text{CH}_3\text{CN}:\text{H}_2\text{O}=9:1(\text{v}:\text{v})$ , Reaction time: 9 h, Yield: 73 %.

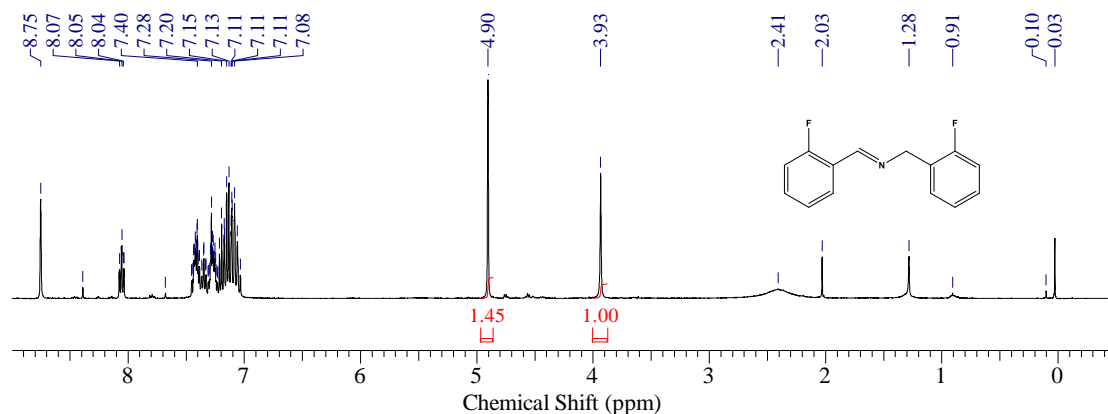

**Figure S4-58.**  $^1\text{H}$  NMR( $\text{CDCl}_3$ , 400 MHz), Photosensitizer: DB-FL (0.5 mol%), Reaction solvent:  $\text{CH}_3\text{CN}:\text{H}_2\text{O}=9:1(\text{v}:\text{v})$ , Reaction time: 5 h, Yield: 74 %.

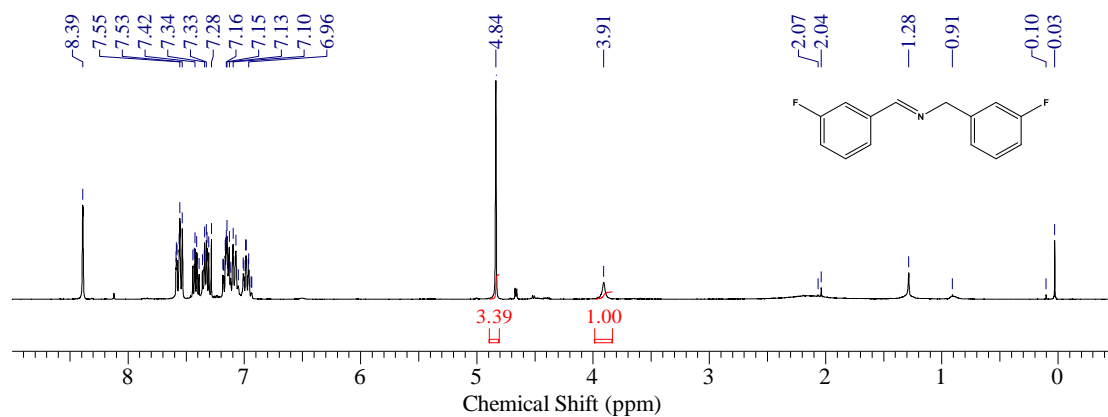

**Figure S4-59.**  $^1\text{H}$  NMR( $\text{CDCl}_3$ , 400 MHz), Photosensitizer: DB-FL (0.5 mol%), Reaction solvent:  $\text{CH}_3\text{CN}:\text{H}_2\text{O}=9:1(\text{v}:\text{v})$ , Reaction time: 5 h, Yield: 87 %.

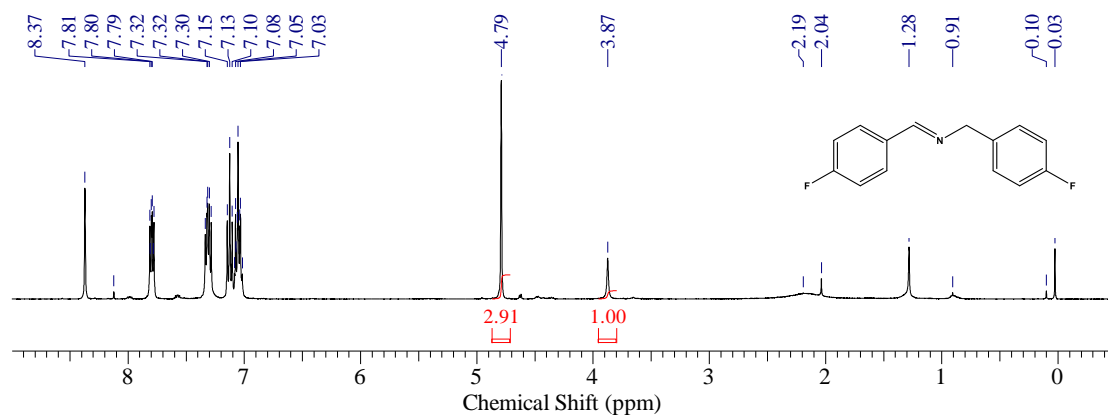

**Figure S4-60.**  $^1\text{H}$  NMR ( $\text{CDCl}_3$ , 400 MHz), Photosensitizer: DB-FL (0.5 mol%), Reaction solvent:  $\text{CH}_3\text{CN}:\text{H}_2\text{O} = 9:1$  (v:v), Reaction time: 5 h, Yield: 85 %.

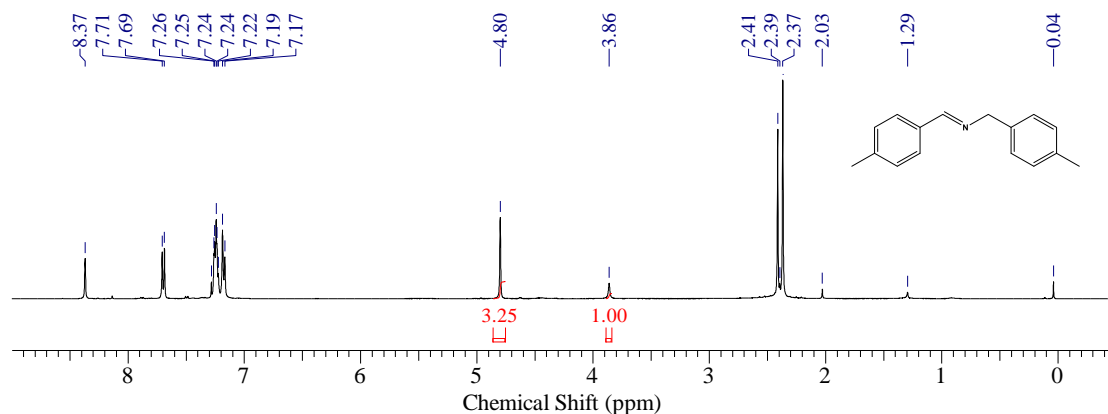

**Figure S4-61.**  $^1\text{H}$  NMR ( $\text{CDCl}_3$ , 400 MHz), Photosensitizer: DB-FL (0.5 mol%), Reaction solvent:  $\text{CH}_3\text{CN}:\text{H}_2\text{O} = 9:1$  (v:v), Reaction time: 5 h, Yield: 87 %.

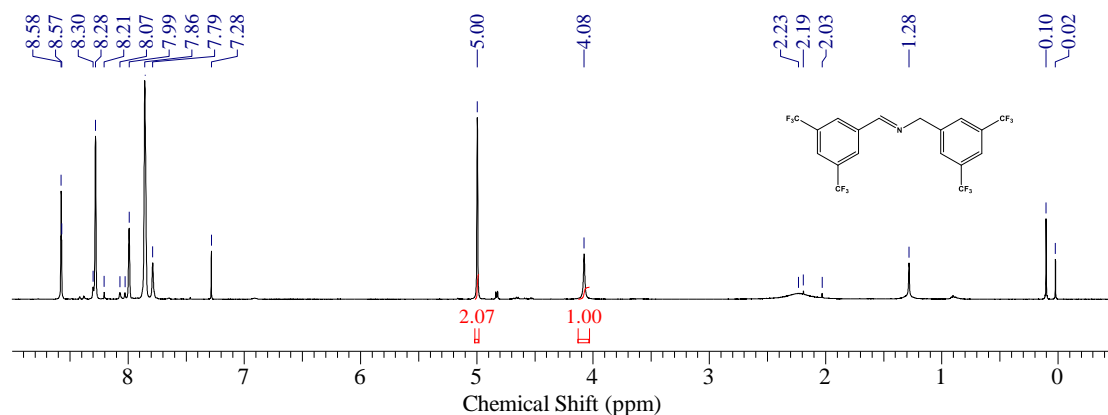

**Figure S4-62.**  $^1\text{H}$  NMR ( $\text{CDCl}_3$ , 400 MHz), Photosensitizer: DB-FL (0.5 mol%), Reaction solvent:  $\text{CH}_3\text{CN}:\text{H}_2\text{O} = 9:1$  (v:v), Reaction time: 5 h, Yield: 81 %.

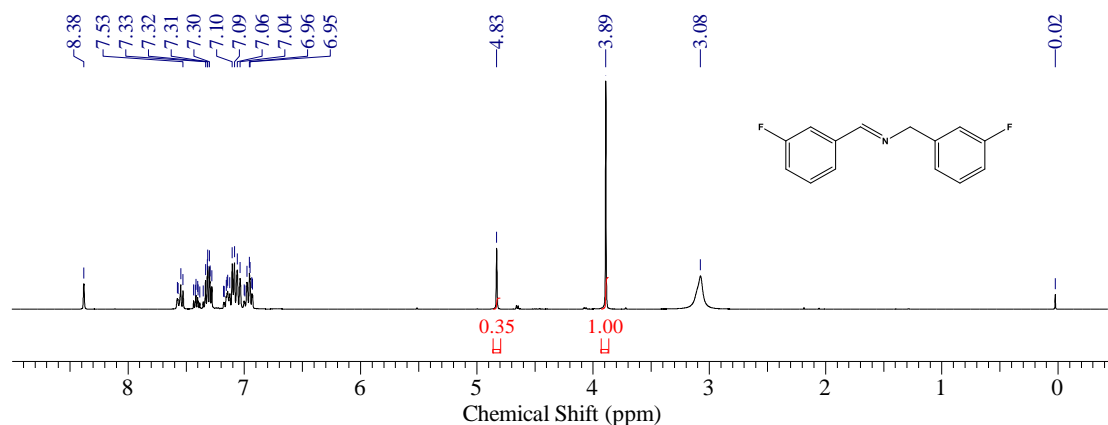

**Figure S4-63.**  $^1\text{H}$  NMR( $\text{CDCl}_3$ ,400 MHz), Photosensitizer: Ph-FL (0.5 mol%), Reaction solvent:  $\text{CH}_3\text{CN}$ , Reaction time: 9 h, Yield: 41 %.

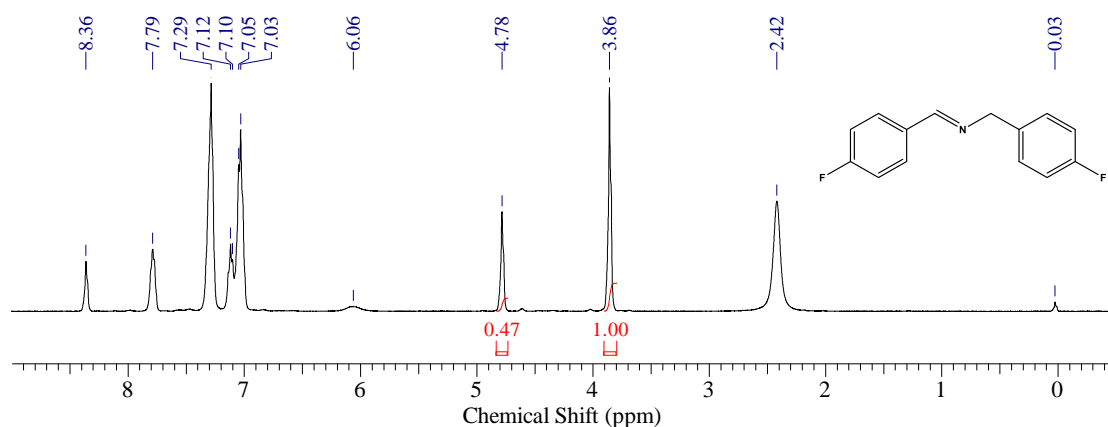

**Figure S4-64.**  $^1\text{H}$  NMR ( $\text{CDCl}_3$ ,400 MHz), Photosensitizer:Ph-FL (0.5 mol%), Reaction solvent:  $\text{CH}_3\text{CN}$ , Reaction time: 9 h, Yield:48 %.

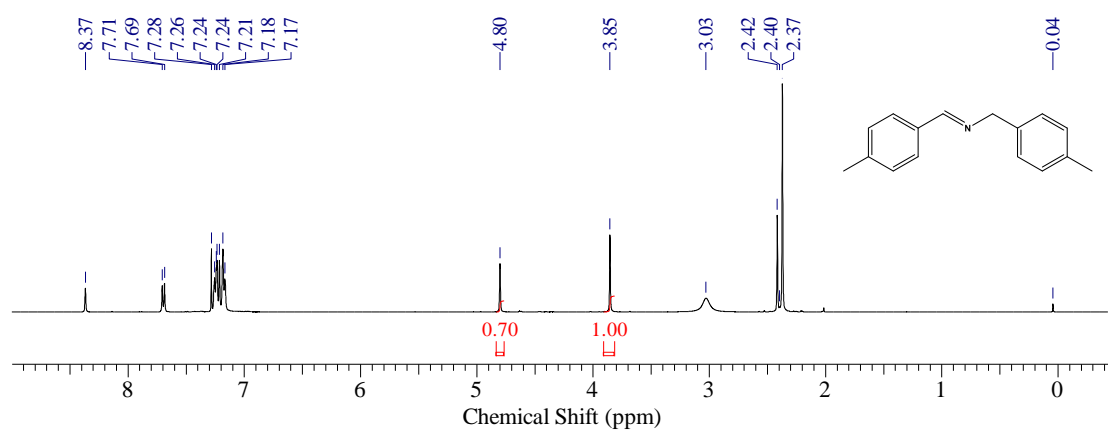

**Figure S4-65.**  $^1\text{H}$  NMR ( $\text{CDCl}_3$ ,400 MHz), Photosensitizer: Ph-FL (0.5 mol%), Reaction solvent:  $\text{CH}_3\text{CN}$ , Reaction time: 9 h, Yield: 60 %.

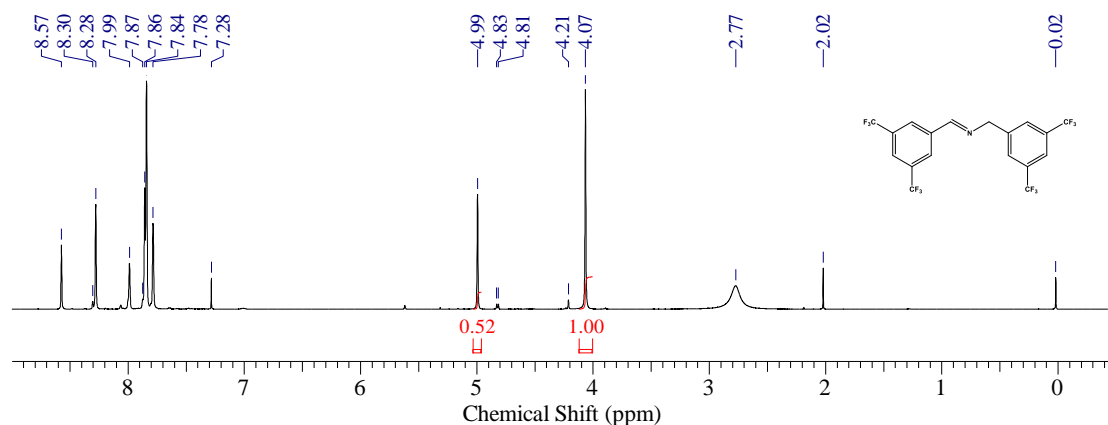

**Figure S4-66.**  $^1\text{H}$  NMR ( $\text{CDCl}_3$ , 400 MHz), Photosensitizer: Ph-FL (0.5 mol%), Reaction solvent:  $\text{CH}_3\text{CN}$ , Reaction time: 9 h, Yield: 60 %.

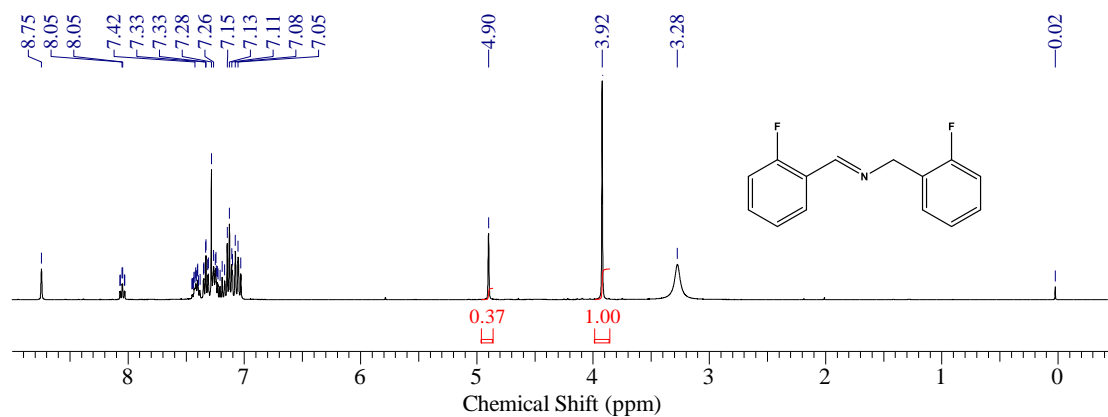

**Figure S4-67.**  $^1\text{H}$  NMR ( $\text{CDCl}_3$ , 400 MHz), Photosensitizer: Ph-FL (0.5 mol%), Reaction solvent:  $\text{CH}_3\text{CN}$ , Reaction time: 9 h, Yield: 43 %.

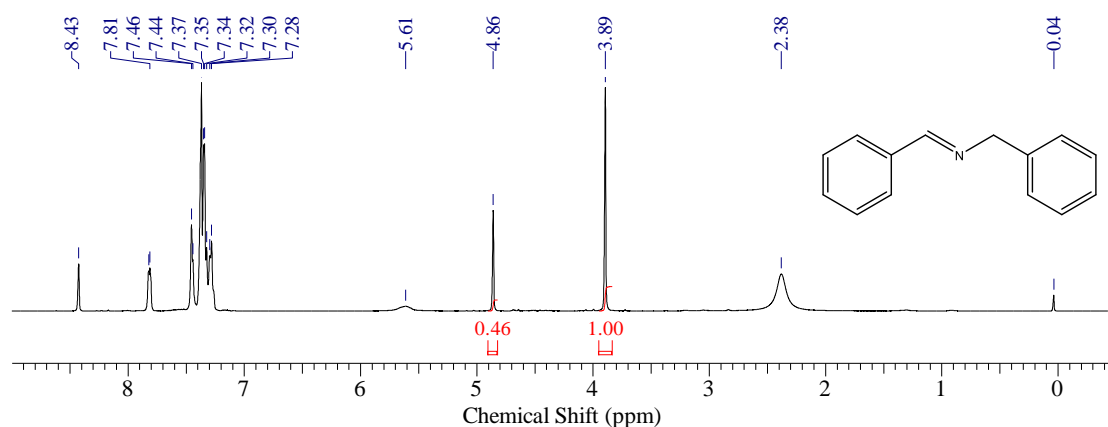

**Figure S4-68.**  $^1\text{H}$  NMR ( $\text{CDCl}_3$ , 400 MHz), Photosensitizer: FL (0.5 mol%), Trapping agent: DABCO (0.5 mol%), Reaction solvent:  $\text{CH}_3\text{CN}$ , Reaction time: 9 h, Yield: 48 %.



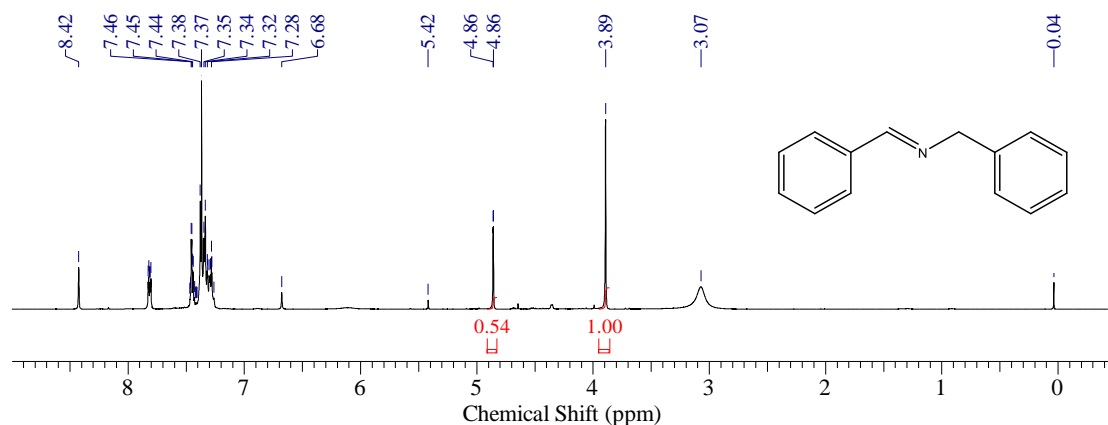

**Figure S4-69.**  $^1\text{H}$  NMR( $\text{CDCl}_3$ , 400 MHz), Photosensitizer: FL (0.5 mol%), Trapping agent: BQ(0.5 mol%), Reaction solvent:  $\text{CH}_3\text{CN}$ , Reaction time: 9 h, Yield: 52 %.

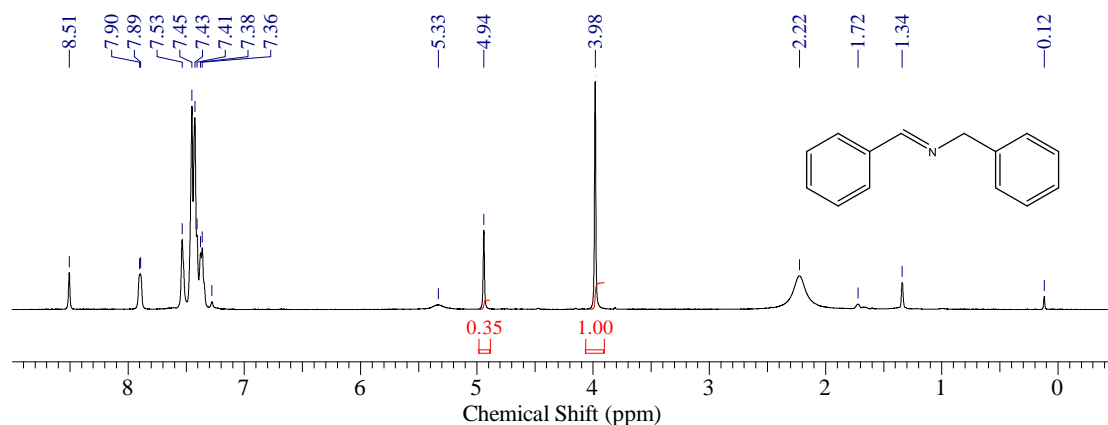

**Figure S4-70.**  $^1\text{H}$  NMR( $\text{CDCl}_3$ , 400 MHz), Photosensitizer: FL (0.5 mol%), Trapping agent: TEMPO(15 mol%), Reaction solvent:  $\text{CH}_3\text{CN}$ , Reaction time: 9 h, Yield: 41 %.

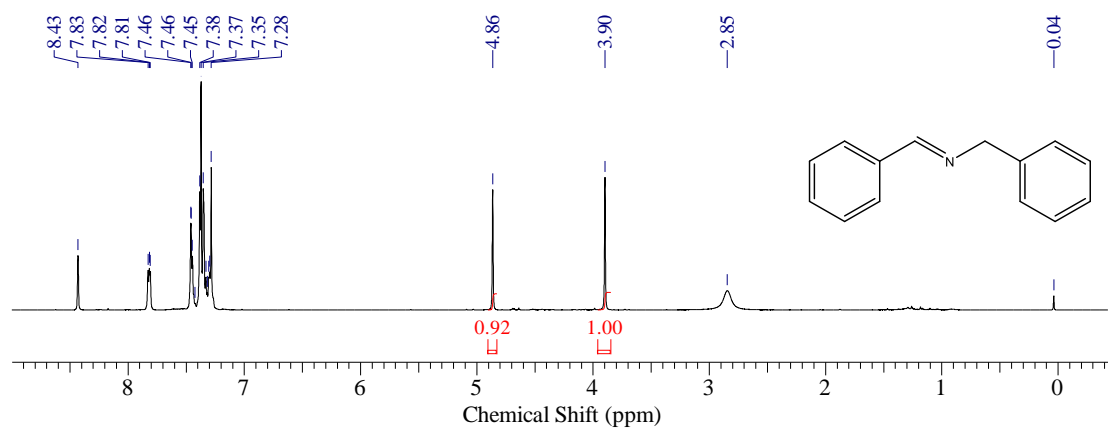

**Figure S4-71.**  $^1\text{H}$  NMR( $\text{CDCl}_3$ , 400 MHz), Photosensitizer: FL (0.5 mol%), Trapping agent: BHT(15 mol%), Reaction solvent:  $\text{CH}_3\text{CN}$ , Reaction time: 9 h, Yield: 65 %.

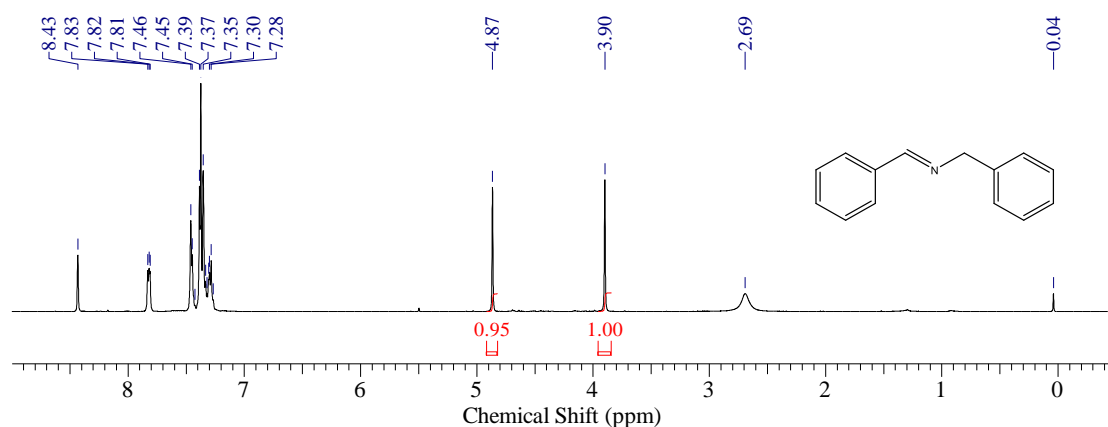

**Figure S4-72.**  $^1\text{H}$  NMR( $\text{CDCl}_3$ , 400 MHz), Photosensitizer: FL (0.5 mol%), Trapping agent: DDUN(15 mol%), Reaction solvent:  $\text{CH}_3\text{CN}$ , Reaction time: 9 h, Yield: 66 %.

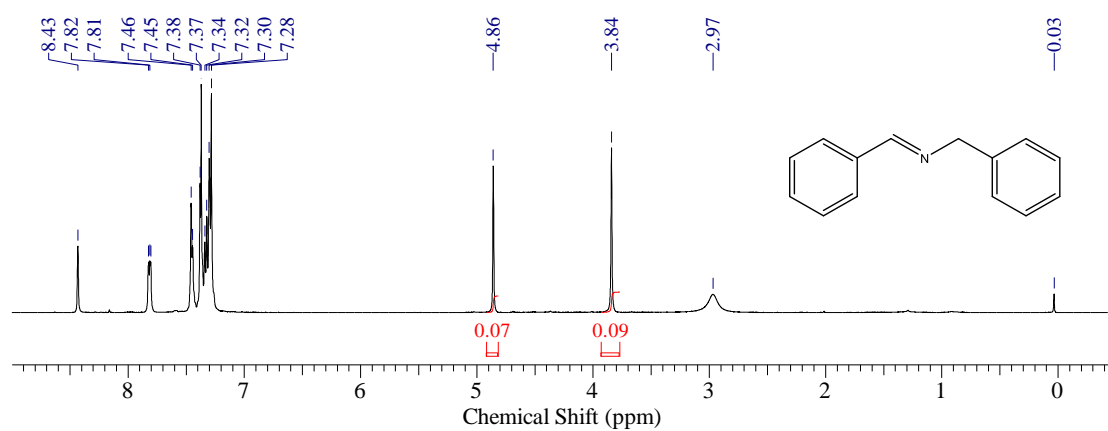

**Figure S4-73.**  $^1\text{H}$  NMR ( $\text{CDCl}_3$ , 400 MHz), Photosensitizer: FL (0.5 mol%), Trapping agent:  $\text{AgNO}_3$ (0.5 mol%), Reaction solvent:  $\text{CH}_3\text{CN}$ , Reaction time: 9 h, Yield: 61 %.

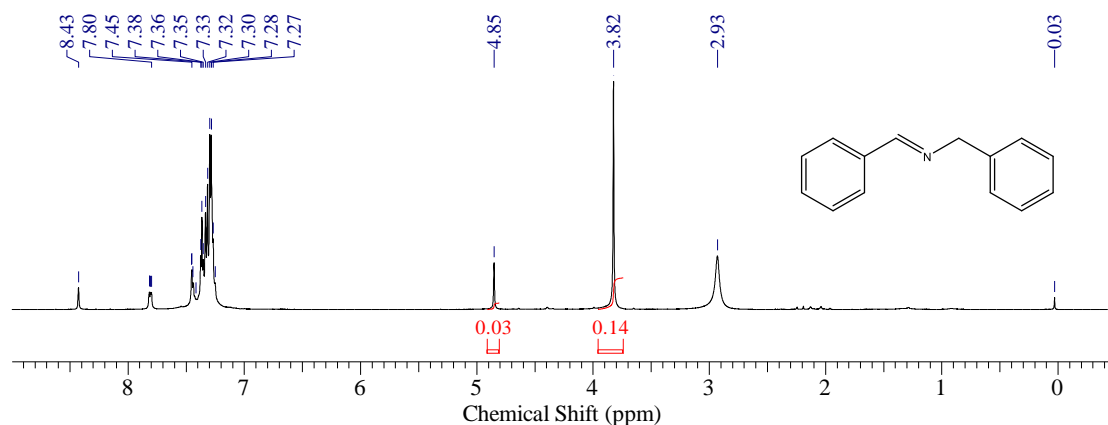

**Figure S4-74.**  $^1\text{H}$  NMR ( $\text{CDCl}_3$ , 400 MHz), Photosensitizer: FL (0.5 mol%), Trapping agent:  $\text{AgNO}_3$  (15 mol%), Reaction solvent:  $\text{CH}_3\text{CN}$ , Reaction time: 9 h, Yield: 30 %.

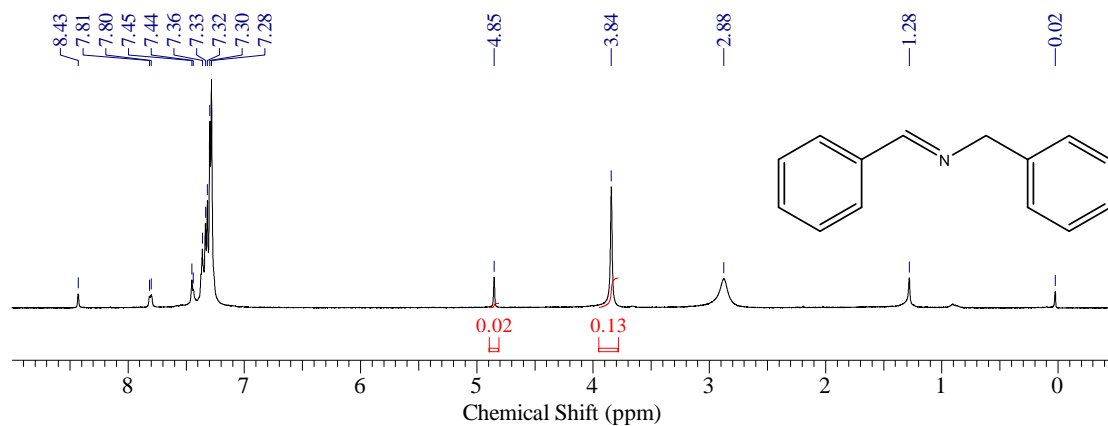

**Figure S4-75.**  $^1\text{H}$  NMR ( $\text{CDCl}_3$ , 400 MHz), Photosensitizer: FL (0.5 mol%), Trapping agent:  $\text{AgNO}_3$  (25 mol%), Reaction solvent:  $\text{CH}_3\text{CN}$ , Reaction time: 9 h, Yield: 24 %.

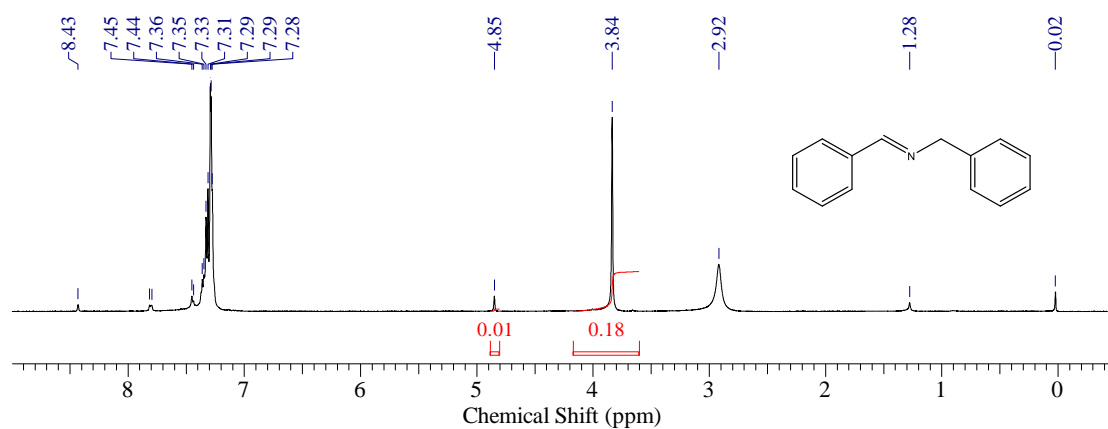

**Figure S4-76.**  $^1\text{H}$  NMR( $\text{CDCl}_3$ , 400 MHz), Photosensitizer: Ph-FL (0.5 mol%), Trapping agent:  $\text{AgNO}_3$  (25 mol%), Reaction solvent:  $\text{CH}_3\text{CN}$ , Reaction time: 9 h, Yield: 10 %.

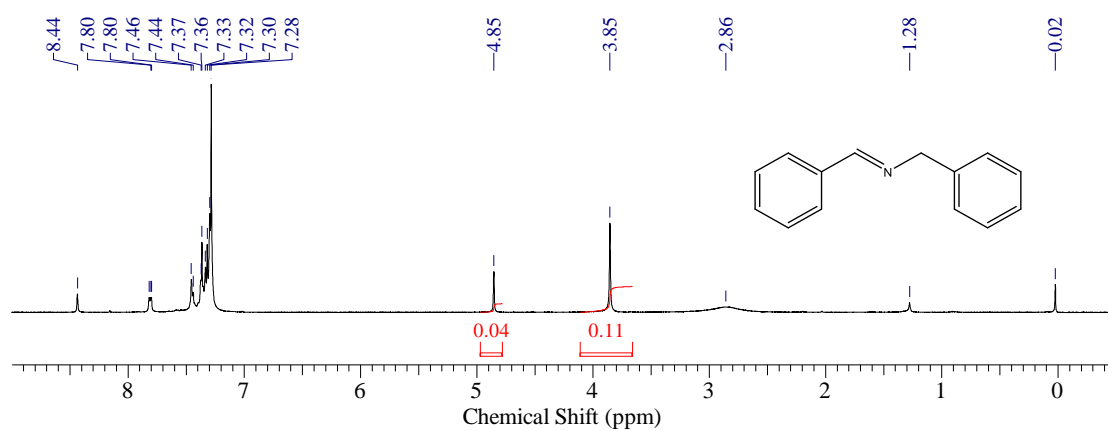

**Figure S4-77.**  $^1\text{H}$  NMR( $\text{CDCl}_3$ , 400 MHz), Photosensitizer: MB-FL (0.5 mol%), Trapping agent:  $\text{AgNO}_3$  (25 mol%), Reaction solvent:  $\text{CH}_3\text{CN}$ , Reaction time: 9 h, Yield: 42 %.

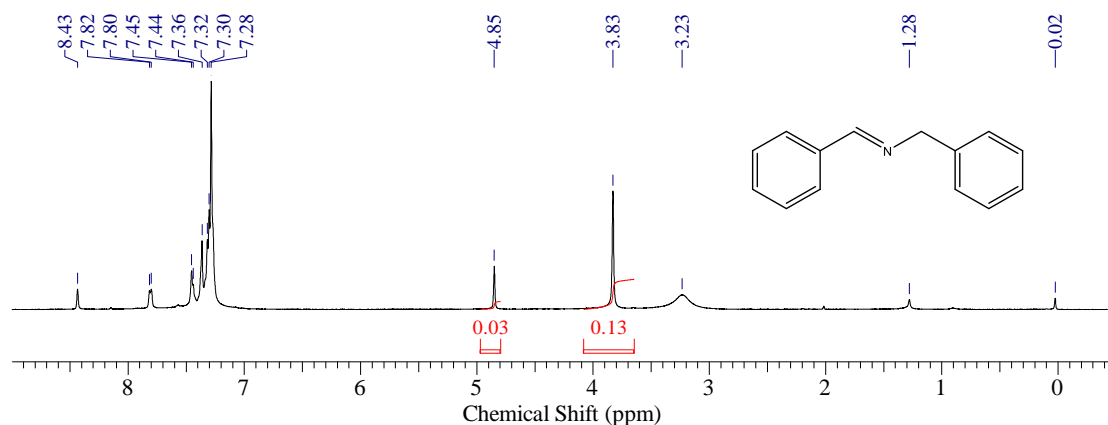

**Figure S4-78.**  $^1\text{H}$  NMR( $\text{CDCl}_3$ , 400 MHz), Photosensitizer: DB-FL (0.5 mol%), Trapping agent:  $\text{AgNO}_3$  (25 mol%), Reaction solvent:  $\text{CH}_3\text{CN} : \text{H}_2\text{O} = 9:1$  (v:v), Reaction time: 5 h, Yield: 32 %.

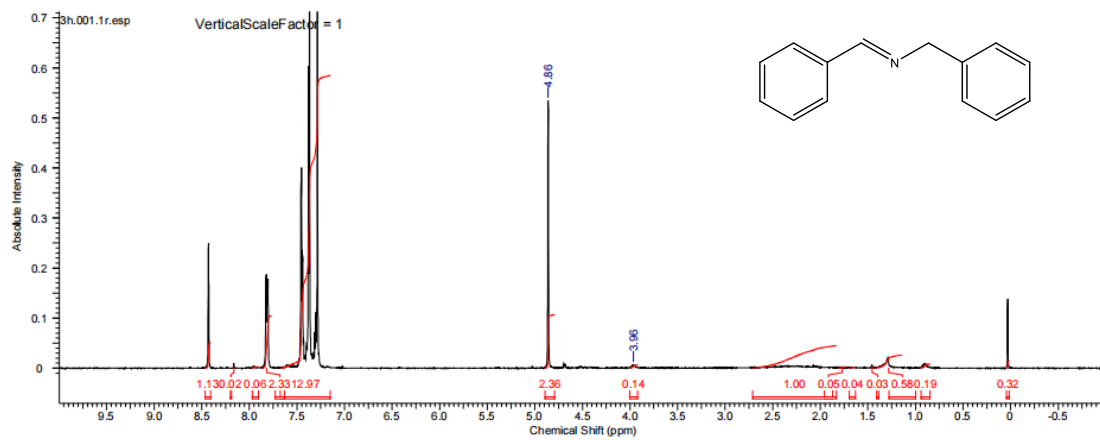

**Figure S4-79.**  $^1\text{H}$  NMR( $\text{CDCl}_3$ , 400 MHz), Photosensitizer: DB-FL (0.5 mol%), Reaction solvent:  $\text{CD}_3\text{CN} : \text{H}_2\text{O} = 9:1$  (v:v), Reaction time: 3 h, Yield: 94.4 %.

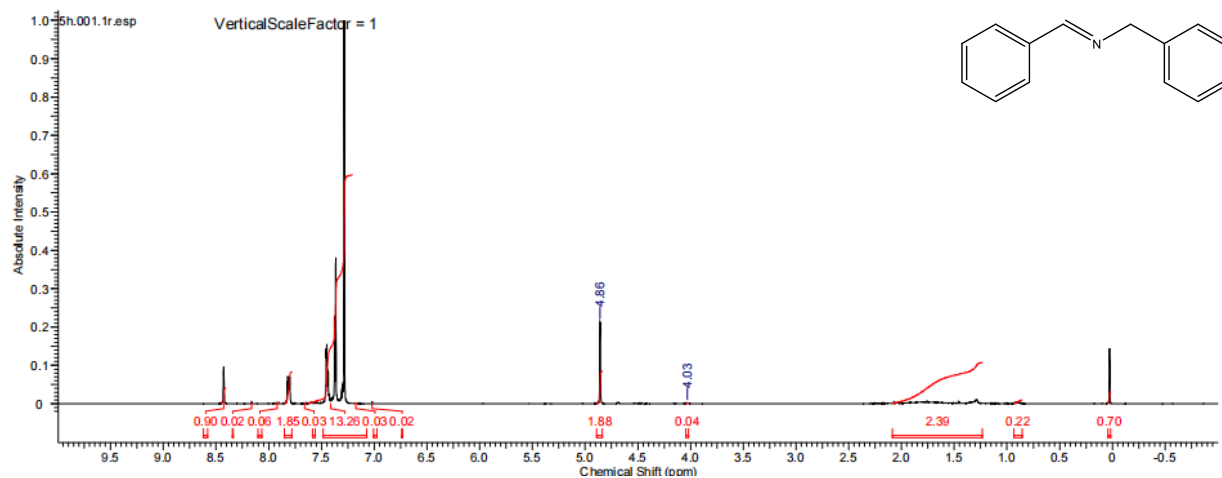

**Figure S4-80.** <sup>1</sup>H NMR(CDCl<sub>3</sub>,400 MHz), Photosensitizer: DB-FL (0.5 mol%), Reaction solvent: CD<sub>3</sub>CN: H<sub>2</sub>O=9:1(v:v),Reaction time:5 h,Yield:97.9 %.

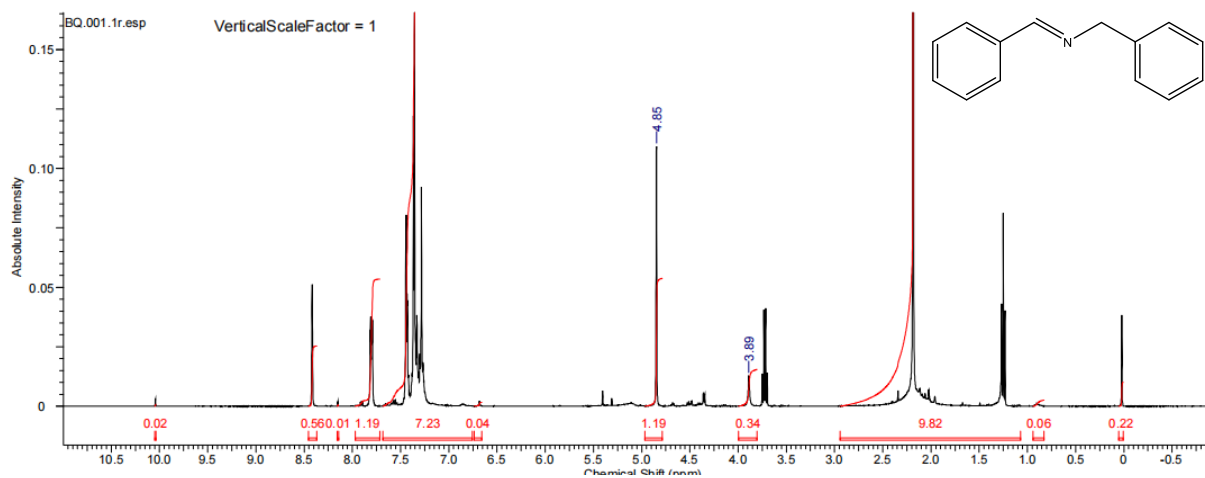

**Figure S4-81.** <sup>1</sup>H NMR(CDCl<sub>3</sub>,400 MHz), Photosensitizer: DB-FL (0.5 mol%), Trapping agent:BQ, Reaction solvent: CH<sub>3</sub>CN: H<sub>2</sub>O=9:1(v:v),Reaction time:5 h,Yield:77.7 %.

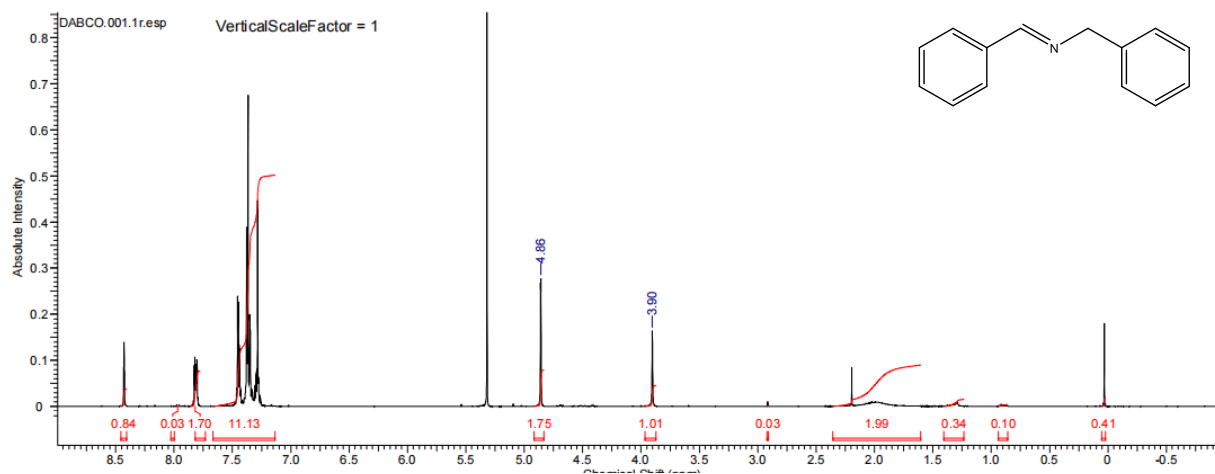

**Figure S4-82.**  $^1\text{H}$  NMR( $\text{CDCl}_3$ , 400 MHz), Photosensitizer: DB-FL (0.5 mol%), Trapping agent: DABCO, Reaction solvent:  $\text{CH}_3\text{CN} : \text{H}_2\text{O} = 9:1$  (v:v), Reaction time: 5 h, Yield: 63.4 %.

## 5. DFT/TD-DFT Results

### Theoretical Methods

The electronic structure and photophysical properties of these sensitizers were investigated with Density Functional Theory (DFT) and Time-dependent (TD)-DFT based calculations. The alkyl groups in chromophores were simplified to  $-\text{CH}_3$ .  $S_0$  structures of sensitizers were fully optimized with 6-311G(d) basis sets<sup>1-3</sup> and B3LYP functional.<sup>4, 5</sup> The impact of potential interactions with solvents to electronic structure of sensitizers were treated with Polarizable Continuum Model (PCM).<sup>6-8</sup> Structures of sensitizers at  $S_1$  and  $T_n$  were obtained by relaxation with TD-DFT calculations based on the  $S_0$  structures. These calculations were performed with Gaussian 16.<sup>9</sup> The  $T_n$  to  $S_0$  transition dipole moments were evaluated with quadratic response function<sup>10-12</sup> and the spin-orbit coupling constants were calculated with Dalton with effective single electron approximation in linear response theory.<sup>13-15</sup> With the electronic structure of sensitizers at  $S_0$  and excited states, photophysical properties of these FLPSs were investigated within the Thermal Vibration Correlation Function (TVCF) formalism as implemented in MOMAP.<sup>16-20</sup>



Table S5-1. Electronic transitions involved in the excitation of FL.

| FL                              | Energy              | f      | Composition | CI      | Character                                    |
|---------------------------------|---------------------|--------|-------------|---------|----------------------------------------------|
| S <sub>0</sub> →S <sub>1</sub>  | 3.0227 eV/410.18 nm | 0.2152 | 59 → 60     | 0.69596 | $\pi \rightarrow \pi^*, n \rightarrow \pi^*$ |
| S <sub>0</sub> →S <sub>2</sub>  | 3.3227 eV/373.14 nm | 0.0008 | 56 → 60     | 0.50597 | $n \rightarrow \pi^*$                        |
|                                 |                     |        | 57 → 60     | 0.48175 | $n \rightarrow \pi^*$                        |
| S <sub>0</sub> →S <sub>3</sub>  | 3.4569 eV/358.66 nm | 0.0001 | 54 → 60     | 0.11469 | $n \rightarrow \pi^*$                        |
|                                 |                     |        | 56 → 60     | 0.48106 | $n \rightarrow \pi^*$                        |
|                                 |                     |        | 57 → 60     | 0.49542 | $n \rightarrow \pi^*$                        |
| S <sub>0</sub> →S <sub>4</sub>  | 3.7649 eV/329.32 nm | 0.1846 | 58 → 60     | 0.68108 | $\pi \rightarrow \pi^*, n \rightarrow \pi^*$ |
|                                 |                     |        | 59 → 61     | 0.14557 | $\pi \rightarrow \pi^*, n \rightarrow \pi^*$ |
| S <sub>0</sub> →S <sub>5</sub>  | 4.1391 eV/299.54 nm | 0.0000 | 54 → 60     | 0.68091 | $n \rightarrow \pi^*$                        |
|                                 |                     |        | 57 → 60     | 0.11805 | $n \rightarrow \pi^*$                        |
| S <sub>0</sub> →S <sub>6</sub>  | 4.2073 eV/294.69 nm | 0.0121 | 55 → 60     | 0.68296 | $\pi \rightarrow \pi^*, n \rightarrow \pi^*$ |
|                                 |                     |        | 59 → 61     | 0.13590 | $\pi \rightarrow \pi^*, n \rightarrow \pi^*$ |
| S <sub>0</sub> →S <sub>7</sub>  | 4.6715 eV/265.41 nm | 0.0004 | 52 → 60     | 0.68362 | $n \rightarrow \pi^*$                        |
|                                 |                     |        | 56 → 61     | 0.13155 | $n \rightarrow \pi^*$                        |
| S <sub>0</sub> →S <sub>8</sub>  | 4.8343 eV/256.47 nm | 0.0407 | 53 → 60     | 0.64940 | $\pi \rightarrow \pi^*, n \rightarrow \pi^*$ |
|                                 |                     |        | 58 → 61     | 0.23530 | $\pi \rightarrow \pi^*, n \rightarrow \pi^*$ |
| S <sub>0</sub> →S <sub>9</sub>  | 4.8870 eV/253.70 nm | 0.7327 | 55 → 60     | 0.15071 | $\pi \rightarrow \pi^*, n \rightarrow \pi^*$ |
|                                 |                     |        | 58 → 60     | 0.11478 | $\pi \rightarrow \pi^*, n \rightarrow \pi^*$ |
|                                 |                     |        | 59 → 61     | 0.65739 | $\pi \rightarrow \pi^*, n \rightarrow \pi^*$ |
| S <sub>0</sub> →S <sub>10</sub> | 5.2148 eV/237.75 nm | 0.0003 | 52 → 60     | 0.12260 | $n \rightarrow \pi^*$                        |
|                                 |                     |        | 56 → 61     | 0.59739 | $n \rightarrow \pi^*$                        |
|                                 |                     |        | 57 → 61     | 0.33662 | $n \rightarrow \pi^*$                        |
| S <sub>0</sub> →T <sub>1</sub>  | 2.1524 eV/576.04 nm | 0.0000 | 58 → 60     | 0.10512 | $\pi \rightarrow \pi^*, n \rightarrow \pi^*$ |
|                                 |                     |        | 59 → 60     | 0.69490 | $\pi \rightarrow \pi^*, n \rightarrow \pi^*$ |
| S <sub>0</sub> →T <sub>2</sub>  | 2.7564 eV/449.80 nm | 0.0000 | 58 → 60     | 0.65690 | $\pi \rightarrow \pi^*, n \rightarrow \pi^*$ |
|                                 |                     |        | 58 → 62     | 0.14210 | $\pi \rightarrow \pi^*, n \rightarrow \pi^*$ |
|                                 |                     |        | 59 → 60     | 0.10191 | $\pi \rightarrow \pi^*, n \rightarrow \pi^*$ |
|                                 |                     |        | 59 → 61     | 0.13926 | $\pi \rightarrow \pi^*, n \rightarrow \pi^*$ |
| S <sub>0</sub> →T <sub>3</sub>  | 2.8757 eV/431.15 nm | 0.0000 | 52 → 60     | 0.20097 | $n \rightarrow \pi^*$                        |
|                                 |                     |        | 56 → 60     | 0.59844 | $n \rightarrow \pi^*$                        |
|                                 |                     |        | 57 → 60     | 0.29162 | $n \rightarrow \pi^*$                        |
| S <sub>0</sub> →T <sub>4</sub>  | 3.2381 eV/382.90 nm | 0.0000 | 54 → 60     | 0.17148 | $n \rightarrow \pi^*$                        |
|                                 |                     |        | 56 → 60     | 0.27731 | $n \rightarrow \pi^*$                        |
|                                 |                     |        | 57 → 60     | 0.60567 | $n \rightarrow \pi^*$                        |
| S <sub>0</sub> →T <sub>5</sub>  | 3.5826 eV/346.07 nm | 0.0000 | 55 → 60     | 0.61066 | $\pi \rightarrow \pi^*, n \rightarrow \pi^*$ |
|                                 |                     |        | 55 → 63     | 0.12514 | $\pi \rightarrow \pi^*, n \rightarrow \pi^*$ |
|                                 |                     |        | 58 → 60     | 0.11312 | $\pi \rightarrow \pi^*, n \rightarrow \pi^*$ |
|                                 |                     |        | 59 → 61     | 0.27992 | $\pi \rightarrow \pi^*, n \rightarrow \pi^*$ |

Table S5-2. Electronic transitions involved in the excitation of MB-FL.

| MB-FL                           | Energy              | f      | Composition | CI      | Character                                    |
|---------------------------------|---------------------|--------|-------------|---------|----------------------------------------------|
| S <sub>0</sub> →S <sub>1</sub>  | 2.9397 eV/421.76 nm | 0.1266 | 75 → 77     | 0.13109 | $\pi \rightarrow \pi^*, n \rightarrow \pi^*$ |
|                                 |                     |        | 76 → 77     | 0.68714 | $\pi \rightarrow \pi^*, n \rightarrow \pi^*$ |
| S <sub>0</sub> →S <sub>2</sub>  | 3.3054 eV/375.10 nm | 0.0036 | 73 → 77     | 0.49011 | $n \rightarrow \pi^*$                        |
|                                 |                     |        | 74 → 77     | 0.49515 | $n \rightarrow \pi^*$                        |
| S <sub>0</sub> →S <sub>3</sub>  | 3.4376 eV/360.67 nm | 0.0678 | 73 → 77     | 0.40367 | $n \rightarrow \pi^*$                        |
|                                 |                     |        | 74 → 77     | 0.38758 | $n \rightarrow \pi^*$                        |
|                                 |                     |        | 75 → 77     | 0.40088 | $\pi \rightarrow \pi^*, n \rightarrow \pi^*$ |
| S <sub>0</sub> →S <sub>4</sub>  | 3.4741 eV/356.88 nm | 0.1751 | 73 → 77     | 0.28775 | $n \rightarrow \pi^*$                        |
|                                 |                     |        | 74 → 77     | 0.28474 | $n \rightarrow \pi^*$                        |
|                                 |                     |        | 75 → 77     | 0.54711 | $\pi \rightarrow \pi^*, n \rightarrow \pi^*$ |
|                                 |                     |        | 76 → 77     | 0.10919 | $\pi \rightarrow \pi^*, n \rightarrow \pi^*$ |
|                                 |                     |        | 76 → 78     | 0.11555 | $\pi \rightarrow \pi^*, n \rightarrow \pi^*$ |
| S <sub>0</sub> →S <sub>5</sub>  | 4.1196 eV/300.97 nm | 0.0004 | 70 → 77     | 0.57012 | $n \rightarrow \pi^*$                        |
|                                 |                     |        | 71 → 77     | 0.37398 | $n \rightarrow \pi^*$                        |
|                                 |                     |        | 74 → 77     | 0.10777 | $n \rightarrow \pi^*$                        |
| S <sub>0</sub> →S <sub>6</sub>  | 4.1836 eV/296.36 nm | 0.0128 | 72 → 77     | 0.67538 | $n \rightarrow \pi^*$                        |
|                                 |                     |        | 76 → 78     | 0.15217 | $n \rightarrow \pi^*$                        |
| S <sub>0</sub> →S <sub>7</sub>  | 4.3292 eV/286.39 nm | 0.0014 | 67 → 77     | 0.11551 | $n \rightarrow \pi^*$                        |
|                                 |                     |        | 70 → 77     | 0.36602 | $n \rightarrow \pi^*$                        |
|                                 |                     |        | 71 → 77     | 0.58022 | $n \rightarrow \pi^*$                        |
| S <sub>0</sub> →S <sub>8</sub>  | 4.6399 eV/267.22 nm | 0.3621 | 68 → 77     | 0.15420 | $\pi \rightarrow \pi^*, n \rightarrow \pi^*$ |
|                                 |                     |        | 72 → 77     | 0.14294 | $n \rightarrow \pi^*$                        |
|                                 |                     |        | 75 → 78     | 0.11895 | $\pi \rightarrow \pi^*, n \rightarrow \pi^*$ |
|                                 |                     |        | 75 → 79     | 0.11391 | $\pi \rightarrow \pi^*, n \rightarrow \pi^*$ |
|                                 |                     |        | 76 → 78     | 0.59254 | $\pi \rightarrow \pi^*, n \rightarrow \pi^*$ |
|                                 |                     |        | 76 → 79     | 0.17905 | $\pi \rightarrow \pi^*, n \rightarrow \pi^*$ |
|                                 |                     |        | 76 → 80     | 0.13154 | $\pi \rightarrow \pi^*, n \rightarrow \pi^*$ |
| S <sub>0</sub> →S <sub>9</sub>  | 4.6985 eV/263.88 nm | 0.0289 | 67 → 77     | 0.45904 | $n \rightarrow \pi^*$                        |
|                                 |                     |        | 68 → 77     | 0.26507 | $\pi \rightarrow \pi^*, n \rightarrow \pi^*$ |
|                                 |                     |        | 69 → 77     | 0.30763 | $\pi \rightarrow \pi^*, n \rightarrow \pi^*$ |
|                                 |                     |        | 73 → 78     | 0.12149 | $n \rightarrow \pi^*$                        |
|                                 |                     |        | 75 → 78     | 0.22353 | $\pi \rightarrow \pi^*, n \rightarrow \pi^*$ |
|                                 |                     |        | 76 → 78     | 0.14921 | $\pi \rightarrow \pi^*, n \rightarrow \pi^*$ |
|                                 |                     |        | 76 → 79     | 0.10128 | $\pi \rightarrow \pi^*, n \rightarrow \pi^*$ |
| S <sub>0</sub> →S <sub>10</sub> | 4.7571 eV/260.63 nm | 0.0106 | 67 → 77     | 0.34442 | $n \rightarrow \pi^*$                        |
|                                 |                     |        | 68 → 77     | 0.17458 | $\pi \rightarrow \pi^*, n \rightarrow \pi^*$ |
|                                 |                     |        | 69 → 77     | 0.39535 | $\pi \rightarrow \pi^*, n \rightarrow \pi^*$ |
|                                 |                     |        | 75 → 78     | 0.38672 | $\pi \rightarrow \pi^*, n \rightarrow \pi^*$ |
|                                 |                     |        | 76 → 79     | 0.12618 | $\pi \rightarrow \pi^*, n \rightarrow \pi^*$ |
| S <sub>0</sub> →T <sub>1</sub>  | 2.1377 eV/579.99 nm | 0.0000 | 75 → 77     | 0.20247 | $\pi \rightarrow \pi^*, n \rightarrow \pi^*$ |
|                                 |                     |        | 76 → 77     | 0.67195 | $\pi \rightarrow \pi^*, n \rightarrow \pi^*$ |
| S <sub>0</sub> →T <sub>2</sub>  | 2.5405 eV/488.03 nm | 0.0000 | 68 → 77     | 0.13567 | $\pi \rightarrow \pi^*, n \rightarrow \pi^*$ |
|                                 |                     |        | 75 → 77     | 0.63261 | $\pi \rightarrow \pi^*, n \rightarrow \pi^*$ |

|                       |                     |        |                     |         |                                              |
|-----------------------|---------------------|--------|---------------------|---------|----------------------------------------------|
| $S_0 \rightarrow T_3$ | 2.8707 eV/431.89 nm | 0.0000 | 75 $\rightarrow$ 79 | 0.11344 | $\pi \rightarrow \pi^*, n \rightarrow \pi^*$ |
|                       |                     |        | 76 $\rightarrow$ 77 | 0.19607 | $\pi \rightarrow \pi^*, n \rightarrow \pi^*$ |
|                       |                     |        | 76 $\rightarrow$ 78 | 0.10225 | $\pi \rightarrow \pi^*, n \rightarrow \pi^*$ |
|                       |                     |        | 67 $\rightarrow$ 77 | 0.17473 | $n \rightarrow \pi^*$                        |
| $S_0 \rightarrow T_4$ | 3.2265 eV/384.27 nm | 0.0000 | 73 $\rightarrow$ 77 | 0.57454 | $n \rightarrow \pi^*$                        |
|                       |                     |        | 74 $\rightarrow$ 77 | 0.33942 | $n \rightarrow \pi^*$                        |
|                       |                     |        | 70 $\rightarrow$ 77 | 0.15251 | $n \rightarrow \pi^*$                        |
|                       |                     |        | 73 $\rightarrow$ 77 | 0.32735 | $n \rightarrow \pi^*$                        |
| $S_0 \rightarrow T_5$ | 3.5256 eV/351.66 nm | 0.0000 | 74 $\rightarrow$ 77 | 0.58236 | $n \rightarrow \pi^*$                        |
|                       |                     |        | 72 $\rightarrow$ 77 | 0.46177 | $n \rightarrow \pi^*$                        |
|                       |                     |        | 75 $\rightarrow$ 77 | 0.13015 | $\pi \rightarrow \pi^*, n \rightarrow \pi^*$ |
|                       |                     |        | 75 $\rightarrow$ 79 | 0.10437 | $\pi \rightarrow \pi^*, n \rightarrow \pi^*$ |
|                       |                     |        | 76 $\rightarrow$ 78 | 0.46178 | $\pi \rightarrow \pi^*, n \rightarrow \pi^*$ |

---

Table S5-3. Electronic transitions involved in the excitation of DB-FL.

| DB-FL                           | Energy              | f      | Composition | CI      | Character                                    |
|---------------------------------|---------------------|--------|-------------|---------|----------------------------------------------|
| S <sub>0</sub> →S <sub>1</sub>  | 2.9061 eV/426.64 nm | 0.2562 | 93 → 94     | 0.69605 | $\pi \rightarrow \pi^*, n \rightarrow \pi^*$ |
| S <sub>0</sub> →S <sub>2</sub>  | 3.2895 eV/376.91 nm | 0.0007 | 90 → 94     | 0.45975 | $n \rightarrow \pi^*$                        |
|                                 |                     |        | 91 → 94     | 0.52471 | $n \rightarrow \pi^*$                        |
| S <sub>0</sub> →S <sub>3</sub>  | 3.4127 eV/363.31 nm | 0.0001 | 86 → 94     | 0.10528 | $n \rightarrow \pi^*$                        |
|                                 |                     |        | 90 → 94     | 0.52556 | $n \rightarrow \pi^*$                        |
|                                 |                     |        | 91 → 94     | 0.44948 | $n \rightarrow \pi^*$                        |
| S <sub>0</sub> →S <sub>4</sub>  | 3.6065 eV/343.78 nm | 0.2527 | 92 → 94     | 0.68436 | $\pi \rightarrow \pi^*, n \rightarrow \pi^*$ |
|                                 |                     |        | 93 → 95     | 0.12714 | $\pi \rightarrow \pi^*, n \rightarrow \pi^*$ |
| S <sub>0</sub> →S <sub>5</sub>  | 4.0742 eV/304.32 nm | 0.0000 | 86 → 94     | 0.62883 | $n \rightarrow \pi^*$                        |
|                                 |                     |        | 88 → 94     | 0.27001 | $n \rightarrow \pi^*$                        |
|                                 |                     |        | 91 → 94     | 0.11108 | $n \rightarrow \pi^*$                        |
| S <sub>0</sub> →S <sub>6</sub>  | 4.0924 eV/302.96 nm | 0.0057 | 87 → 94     | 0.52915 | $n \rightarrow \pi^*$                        |
|                                 |                     |        | 89 → 94     | 0.45640 | $\pi \rightarrow \pi^*, n \rightarrow \pi^*$ |
| S <sub>0</sub> →S <sub>7</sub>  | 4.1394 eV/299.52 nm | 0.0000 | 86 → 94     | 0.26423 | $n \rightarrow \pi^*$                        |
|                                 |                     |        | 88 → 94     | 0.65064 | $n \rightarrow \pi^*$                        |
| S <sub>0</sub> →S <sub>8</sub>  | 4.1701 eV/297.32 nm | 0.0153 | 87 → 94     | 0.43540 | $n \rightarrow \pi^*$                        |
|                                 |                     |        | 89 → 94     | 0.51342 | $\pi \rightarrow \pi^*, n \rightarrow \pi^*$ |
|                                 |                     |        | 93 → 95     | 0.16501 | $\pi \rightarrow \pi^*, n \rightarrow \pi^*$ |
| S <sub>0</sub> →S <sub>9</sub>  | 4.5884 eV/270.21 nm | 0.0000 | 89 → 96     | 0.13368 | $\pi \rightarrow \pi^*, n \rightarrow \pi^*$ |
|                                 |                     |        | 93 → 96     | 0.69182 | $\pi \rightarrow \pi^*, n \rightarrow \pi^*$ |
| S <sub>0</sub> →S <sub>10</sub> | 4.6606 eV/266.03 nm | 0.0004 | 83 → 94     | 0.65622 | $n \rightarrow \pi^*$                        |
|                                 |                     |        | 85 → 94     | 0.18944 | $n \rightarrow \pi^*$                        |
|                                 |                     |        | 90 → 95     | 0.13568 | $n \rightarrow \pi^*$                        |
| S <sub>0</sub> →T <sub>1</sub>  | 2.0857 eV/594.45 nm | 0.0000 | 93 → 94     | 0.69106 | $\pi \rightarrow \pi^*, n \rightarrow \pi^*$ |
| S <sub>0</sub> →T <sub>2</sub>  | 2.6797 eV/462.67 nm | 0.0000 | 84 → 94     | 0.14042 | $\pi \rightarrow \pi^*, n \rightarrow \pi^*$ |
|                                 |                     |        | 92 → 94     | 0.64343 | $\pi \rightarrow \pi^*, n \rightarrow \pi^*$ |
|                                 |                     |        | 92 → 97     | 0.13561 | $\pi \rightarrow \pi^*, n \rightarrow \pi^*$ |
|                                 |                     |        | 93 → 95     | 0.15148 | $\pi \rightarrow \pi^*, n \rightarrow \pi^*$ |
| S <sub>0</sub> →T <sub>3</sub>  | 2.8770 eV/430.95 nm | 0.0000 | 83 → 94     | 0.19213 | $n \rightarrow \pi^*$                        |
|                                 |                     |        | 90 → 94     | 0.59319 | $n \rightarrow \pi^*$                        |
|                                 |                     |        | 91 → 94     | 0.30431 | $n \rightarrow \pi^*$                        |
| S <sub>0</sub> →T <sub>4</sub>  | 3.1872 eV/389.00 nm | 0.0000 | 86 → 94     | 0.16812 | $n \rightarrow \pi^*$                        |
|                                 |                     |        | 90 → 94     | 0.29058 | $n \rightarrow \pi^*$                        |
|                                 |                     |        | 91 → 94     | 0.59944 | $n \rightarrow \pi^*$                        |
| S <sub>0</sub> →T <sub>5</sub>  | 3.4906 eV/355.20 nm | 0.0000 | 87 → 94     | 0.40901 | $n \rightarrow \pi^*$                        |
|                                 |                     |        | 89 → 94     | 0.32527 | $\pi \rightarrow \pi^*, n \rightarrow \pi^*$ |
|                                 |                     |        | 92 → 94     | 0.11877 | $\pi \rightarrow \pi^*, n \rightarrow \pi^*$ |
|                                 |                     |        | 93 → 95     | 0.42272 | $\pi \rightarrow \pi^*, n \rightarrow \pi^*$ |

Table S5-4. Electronic transitions involved in the excitation of Ph-FL.

| Ph-FL                           | Energy              | f      | Composition | CI      | Character                                    |
|---------------------------------|---------------------|--------|-------------|---------|----------------------------------------------|
| S <sub>0</sub> →S <sub>1</sub>  | 3.0223 eV/410.23 nm | 0.2141 | 75 → 76     | 0.69440 | $\pi \rightarrow \pi^*, n \rightarrow \pi^*$ |
| S <sub>0</sub> →S <sub>2</sub>  | 3.2805 eV/377.94 nm | 0.0006 | 70 → 76     | 0.38996 | $\pi \rightarrow \pi^*, n \rightarrow \pi^*$ |
|                                 |                     |        | 72 → 76     | 0.45592 | $n \rightarrow \pi^*$                        |
|                                 |                     |        | 74 → 76     | 0.36410 | $\pi \rightarrow \pi^*, n \rightarrow \pi^*$ |
| S <sub>0</sub> →S <sub>3</sub>  | 3.3792 eV/366.91 nm | 0.0000 | 68 → 76     | 0.11760 | $n \rightarrow \pi^*$                        |
|                                 |                     |        | 72 → 76     | 0.47665 | $\pi \rightarrow \pi^*, n \rightarrow \pi^*$ |
|                                 |                     |        | 74 → 76     | 0.49177 | $\pi \rightarrow \pi^*, n \rightarrow \pi^*$ |
| S <sub>0</sub> →S <sub>4</sub>  | 3.6278 eV/341.76 nm | 0.0818 | 73 → 76     | 0.69305 | $\pi \rightarrow \pi^*, n \rightarrow \pi^*$ |
| S <sub>0</sub> →S <sub>5</sub>  | 3.7189 eV/333.39 nm | 0.0003 | 70 → 76     | 0.56842 | $\pi \rightarrow \pi^*, n \rightarrow \pi^*$ |
|                                 |                     |        | 72 → 76     | 0.22251 | $n \rightarrow \pi^*$                        |
|                                 |                     |        | 74 → 76     | 0.34254 | $\pi \rightarrow \pi^*, n \rightarrow \pi^*$ |
| S <sub>0</sub> →S <sub>6</sub>  | 3.7974 eV/326.50 nm | 0.1195 | 71 → 76     | 0.68816 | $\pi \rightarrow \pi^*, n \rightarrow \pi^*$ |
|                                 |                     |        | 75 → 77     | 0.11349 | $\pi \rightarrow \pi^*, n \rightarrow \pi^*$ |
| S <sub>0</sub> →S <sub>7</sub>  | 4.1396 eV/299.51 nm | 0.0000 | 68 → 76     | 0.67877 | $n \rightarrow \pi^*$                        |
| S <sub>0</sub> →S <sub>8</sub>  | 4.1978 eV/295.35 nm | 0.0131 | 69 → 76     | 0.68349 | $n \rightarrow \pi^*$                        |
|                                 |                     |        | 75 → 77     | 0.13401 | $\pi \rightarrow \pi^*, n \rightarrow \pi^*$ |
| S <sub>0</sub> →S <sub>9</sub>  | 4.6988 eV/263.87 nm | 0.0002 | 66 → 76     | 0.67118 | $\pi \rightarrow \pi^*, n \rightarrow \pi^*$ |
|                                 |                     |        | 70 → 77     | 0.10706 | $\pi \rightarrow \pi^*, n \rightarrow \pi^*$ |
|                                 |                     |        | 74 → 77     | 0.10839 | $\pi \rightarrow \pi^*, n \rightarrow \pi^*$ |
| S <sub>0</sub> →S <sub>10</sub> | 4.8520 eV/255.53 nm | 0.2252 | 67 → 76     | 0.56461 | $\pi \rightarrow \pi^*, n \rightarrow \pi^*$ |
|                                 |                     |        | 71 → 77     | 0.13175 | $\pi \rightarrow \pi^*, n \rightarrow \pi^*$ |
|                                 |                     |        | 73 → 77     | 0.17685 | $\pi \rightarrow \pi^*, n \rightarrow \pi^*$ |
|                                 |                     |        | 75 → 77     | 0.33909 | $\pi \rightarrow \pi^*, n \rightarrow \pi^*$ |
| S <sub>0</sub> →T <sub>1</sub>  | 2.1429 eV/578.58 nm | 0.0000 | 75 → 76     | 0.69244 | $\pi \rightarrow \pi^*, n \rightarrow \pi^*$ |
| S <sub>0</sub> →T <sub>2</sub>  | 2.7509 eV/450.71 nm | 0.0000 | 71 → 76     | 0.43977 | $\pi \rightarrow \pi^*, n \rightarrow \pi^*$ |
|                                 |                     |        | 73 → 76     | 0.48775 | $\pi \rightarrow \pi^*, n \rightarrow \pi^*$ |
|                                 |                     |        | 75 → 76     | 0.11713 | $\pi \rightarrow \pi^*, n \rightarrow \pi^*$ |
|                                 |                     |        | 75 → 77     | 0.12672 | $\pi \rightarrow \pi^*, n \rightarrow \pi^*$ |
| S <sub>0</sub> →T <sub>3</sub>  | 2.8421 eV/436.25 nm | 0.0000 | 66 → 76     | 0.18655 | $\pi \rightarrow \pi^*, n \rightarrow \pi^*$ |
|                                 |                     |        | 70 → 76     | 0.47385 | $\pi \rightarrow \pi^*, n \rightarrow \pi^*$ |
|                                 |                     |        | 72 → 76     | 0.39268 | $n \rightarrow \pi^*$                        |
|                                 |                     |        | 74 → 76     | 0.26266 | $\pi \rightarrow \pi^*, n \rightarrow \pi^*$ |
| S <sub>0</sub> →T <sub>4</sub>  | 3.1972 eV/387.79 nm | 0.0000 | 68 → 76     | 0.17012 | $n \rightarrow \pi^*$                        |
|                                 |                     |        | 70 → 76     | 0.15968 | $\pi \rightarrow \pi^*, n \rightarrow \pi^*$ |
|                                 |                     |        | 72 → 76     | 0.49924 | $n \rightarrow \pi^*$                        |
|                                 |                     |        | 74 → 76     | 0.41784 | $\pi \rightarrow \pi^*, n \rightarrow \pi^*$ |
| S <sub>0</sub> →T <sub>5</sub>  | 3.5620 eV/348.08 nm | 0.0000 | 69 → 76     | 0.59168 | $n \rightarrow \pi^*$                        |
|                                 |                     |        | 69 → 81     | 0.12104 | $n \rightarrow \pi^*$                        |
|                                 |                     |        | 73 → 76     | 0.16351 | $\pi \rightarrow \pi^*, n \rightarrow \pi^*$ |
|                                 |                     |        | 75 → 77     | 0.29034 | $\pi \rightarrow \pi^*, n \rightarrow \pi^*$ |

Table S5-5. Electronic transitions involved in the excitation of DB-FL calculated at CAM-B3LYP/6-311G(d) level of theory.

| DB-FL                          | Energy              | f      | Composition | CI      | Character |
|--------------------------------|---------------------|--------|-------------|---------|-----------|
| S <sub>0</sub> →S <sub>1</sub> | 3.3450 eV/370.65 nm | 0.4102 | 93 → 94     | 0.69392 | π→π*,n→π* |
| S <sub>0</sub> →S <sub>2</sub> | 3.7020 eV/334.92 nm | 0.0014 | 83 → 94     | 0.17031 | n→π*      |
|                                |                     |        | 90 → 94     | 0.54959 | n→π*      |
|                                |                     |        | 91 → 94     | 0.37803 | n→π*      |
| S <sub>0</sub> →S <sub>3</sub> | 4.1409 eV/299.42 nm | 0.0000 | 86 → 94     | 0.27013 | n→π*      |
|                                |                     |        | 86 → 98     | 0.10753 | n→π*      |
|                                |                     |        | 90 → 94     | 0.34727 | n→π*      |
|                                |                     |        | 91 → 94     | 0.49646 | n→π*      |
|                                |                     |        | 91 → 98     | 0.12821 | n→π*      |
| S <sub>0</sub> →S <sub>4</sub> | 4.2374 eV/292.59 nm | 0.2240 | 92 → 94     | 0.67046 | π→π*,n→π* |
|                                |                     |        | 93 → 95     | 0.15901 | π→π*,n→π* |
| S <sub>0</sub> →S <sub>5</sub> | 4.8750 eV/254.32 nm | 0.1365 | 82 → 94     | 0.12842 | π→π*,n→π* |
|                                |                     |        | 87 → 94     | 0.47370 | n→π*      |
|                                |                     |        | 89 → 94     | 0.28411 | π→π*,n→π* |
|                                |                     |        | 92 → 95     | 0.13935 | π→π*,n→π* |
|                                |                     |        | 93 → 95     | 0.34286 | π→π*,n→π* |
|                                |                     |        | 93 → 97     | 0.14371 | π→π*,n→π* |
| S <sub>0</sub> →S <sub>6</sub> | 4.9859 eV/248.67 nm | 0.0000 | 83 → 94     | 0.22099 | n→π*      |
|                                |                     |        | 86 → 94     | 0.51583 | n→π*      |
|                                |                     |        | 86 → 100    | 0.10783 | n→π*      |
|                                |                     |        | 90 → 94     | 0.16092 | n→π*      |
|                                |                     |        | 90 → 95     | 0.13439 | n→π*      |
|                                |                     |        | 91 → 94     | 0.20102 | n→π*      |
|                                |                     |        | 91 → 95     | 0.16261 | n→π*      |
|                                |                     |        | 91 → 95     | 0.10466 | n→π*      |
|                                |                     |        | 91 → 100    |         |           |
| S <sub>0</sub> →S <sub>7</sub> | 5.1049 eV/242.87 nm | 0.4649 | 89 → 94     | 0.41954 | π→π*,n→π* |
|                                |                     |        | 92 → 94     | 0.18163 | π→π*,n→π* |
|                                |                     |        | 92 → 95     | 0.11627 | π→π*,n→π* |
|                                |                     |        | 93 → 95     | 0.46674 | π→π*,n→π* |
|                                |                     |        | 93 → 97     | 0.17089 | π→π*,n→π* |
| S <sub>0</sub> →S <sub>8</sub> | 5.1560 eV/240.47 nm | 0.0001 | 83 → 94     | 0.54052 | n→π*      |
|                                |                     |        | 86 → 94     | 0.20740 | n→π*      |
|                                |                     |        | 90 → 95     | 0.24472 | n→π*      |
|                                |                     |        | 90 → 98     | 0.11480 | n→π*      |
|                                |                     |        | 91 → 94     | 0.10575 | n→π*      |
|                                |                     |        | 91 → 95     | 0.14850 | n→π*      |
| S <sub>0</sub> →S <sub>9</sub> | 5.1879 eV/238.99 nm | 0.5425 | 87 → 94     | 0.50182 | n→π*      |
|                                |                     |        | 89 → 94     | 0.29694 | π→π*,n→π* |
|                                |                     |        | 92 → 95     | 0.14696 | π→π*,n→π* |
|                                |                     |        | 93 → 95     | 0.32555 | π→π*,n→π* |
|                                |                     |        | 93 → 97     | 0.10585 | π→π*,n→π* |

|                          |                     |        |         |         |                                              |
|--------------------------|---------------------|--------|---------|---------|----------------------------------------------|
| $S_0 \rightarrow S_{10}$ | 5.2890 eV/234.42 nm | 0.0001 | 89 → 94 | 0.31195 | $\pi \rightarrow \pi^*, n \rightarrow \pi^*$ |
|                          |                     |        | 93 → 96 | 0.61391 | $\pi \rightarrow \pi^*, n \rightarrow \pi^*$ |
| $S_0 \rightarrow T_1$    | 2.2529 eV/550.32 nm | 0.0000 | 89 → 94 | 0.12909 | $\pi \rightarrow \pi^*, n \rightarrow \pi^*$ |
|                          |                     |        | 92 → 94 | 0.19278 | $\pi \rightarrow \pi^*, n \rightarrow \pi^*$ |
|                          |                     |        | 93 → 94 | 0.64457 | $\pi \rightarrow \pi^*, n \rightarrow \pi^*$ |
| $S_0 \rightarrow T_2$    | 2.8423 eV/436.21 nm | 0.0000 | 84 → 94 | 0.16780 | $\pi \rightarrow \pi^*, n \rightarrow \pi^*$ |
|                          |                     |        | 92 → 94 | 0.53188 | $\pi \rightarrow \pi^*, n \rightarrow \pi^*$ |
|                          |                     |        | 92 → 97 | 0.20812 | $\pi \rightarrow \pi^*, n \rightarrow \pi^*$ |
|                          |                     |        | 93 → 94 | 0.20711 | $\pi \rightarrow \pi^*, n \rightarrow \pi^*$ |
|                          |                     |        | 93 → 95 | 0.27116 | $\pi \rightarrow \pi^*, n \rightarrow \pi^*$ |
| $S_0 \rightarrow T_3$    | 3.1216 eV/397.18 nm | 0.0000 | 83 → 94 | 0.26676 | $n \rightarrow \pi^*$                        |
|                          |                     |        | 90 → 94 | 0.52929 | $n \rightarrow \pi^*$                        |
|                          |                     |        | 91 → 94 | 0.32157 | $n \rightarrow \pi^*$                        |
| $S_0 \rightarrow T_4$    | 3.7751 eV/328.42 nm | 0.0000 | 89 → 94 | 0.22791 | $\pi \rightarrow \pi^*, n \rightarrow \pi^*$ |
|                          |                     |        | 92 → 94 | 0.26179 | $\pi \rightarrow \pi^*, n \rightarrow \pi^*$ |
|                          |                     |        | 93 → 94 | 0.10752 | $\pi \rightarrow \pi^*, n \rightarrow \pi^*$ |
|                          |                     |        | 93 → 95 | 0.55719 | $\pi \rightarrow \pi^*, n \rightarrow \pi^*$ |
| $S_0 \rightarrow T_5$    | 3.8117 eV/325.27 nm | 0.0000 | 86 → 94 | 0.29286 | $n \rightarrow \pi^*$                        |
|                          |                     |        | 86 → 98 | 0.14513 | $n \rightarrow \pi^*$                        |
|                          |                     |        | 90 → 94 | 0.26990 | $n \rightarrow \pi^*$                        |
|                          |                     |        | 91 → 94 | 0.49905 | $n \rightarrow \pi^*$                        |
|                          |                     |        | 91 → 98 | 0.16704 | $n \rightarrow \pi^*$                        |

---

Table S5-6. Electronic transitions involved in the excitation of DB-FL calculated at  $\omega$ B97XD/6-311G(d) level of theory.

| DB-FL                          | Energy              | f      | Composition | CI      | Character                                    |
|--------------------------------|---------------------|--------|-------------|---------|----------------------------------------------|
| S <sub>0</sub> →S <sub>1</sub> | 3.3367 eV/371.58 nm | 0.4101 | 93 → 94     | 0.69084 | $\pi \rightarrow \pi^*, n \rightarrow \pi^*$ |
| S <sub>0</sub> →S <sub>2</sub> | 3.6665 eV/338.15 nm | 0.0013 | 83 → 94     | 0.16729 | $n \rightarrow \pi^*$                        |
|                                |                     |        | 90 → 94     | 0.57318 | $n \rightarrow \pi^*$                        |
|                                |                     |        | 91 → 94     | 0.34299 | $n \rightarrow \pi^*$                        |
| S <sub>0</sub> →S <sub>3</sub> | 4.1161 eV/301.22 nm | 0.0000 | 86 → 94     | 0.28907 | $n \rightarrow \pi^*$                        |
|                                |                     |        | 86 → 98     | 0.10694 | $n \rightarrow \pi^*$                        |
|                                |                     |        | 90 → 94     | 0.31115 | $n \rightarrow \pi^*$                        |
|                                |                     |        | 91 → 94     | 0.50901 | $n \rightarrow \pi^*$                        |
|                                |                     |        | 91 → 98     | 0.12887 | $n \rightarrow \pi^*$                        |
| S <sub>0</sub> →S <sub>4</sub> | 4.2646 eV/290.73 nm | 0.2252 | 84 → 98     | 0.10718 | $\pi \rightarrow \pi^*, n \rightarrow \pi^*$ |
|                                |                     |        | 92 → 94     | 0.66427 | $\pi \rightarrow \pi^*, n \rightarrow \pi^*$ |
|                                |                     |        | 93 → 95     | 0.16150 | $\pi \rightarrow \pi^*, n \rightarrow \pi^*$ |
| S <sub>0</sub> →S <sub>5</sub> | 4.8725 eV/254.46 nm | 0.1149 | 82 → 94     | 0.14158 | $\pi \rightarrow \pi^*, n \rightarrow \pi^*$ |
|                                |                     |        | 87 → 94     | 0.48250 | $n \rightarrow \pi^*$                        |
|                                |                     |        | 89 → 94     | 0.26198 | $\pi \rightarrow \pi^*, n \rightarrow \pi^*$ |
|                                |                     |        | 92 → 95     | 0.15153 | $\pi \rightarrow \pi^*, n \rightarrow \pi^*$ |
|                                |                     |        | 93 → 95     | 0.32597 | $\pi \rightarrow \pi^*, n \rightarrow \pi^*$ |
|                                |                     |        | 93 → 97     | 0.16293 | $\pi \rightarrow \pi^*, n \rightarrow \pi^*$ |
| S <sub>0</sub> →S <sub>6</sub> | 5.0009 eV/247.92 nm | 0.0001 | 83 → 94     | 0.29281 | $n \rightarrow \pi^*$                        |
|                                |                     |        | 86 → 94     | 0.47262 | $n \rightarrow \pi^*$                        |
|                                |                     |        | 90 → 94     | 0.16543 | $n \rightarrow \pi^*$                        |
|                                |                     |        | 90 → 95     | 0.15741 | $n \rightarrow \pi^*$                        |
|                                |                     |        | 91 → 94     | 0.20459 | $n \rightarrow \pi^*$                        |
|                                |                     |        | 91 → 95     | 0.15122 | $n \rightarrow \pi^*$                        |
|                                |                     |        | 91 → 100    | 0.10478 | $n \rightarrow \pi^*$                        |
| S <sub>0</sub> →S <sub>7</sub> | 5.1294 eV/241.71 nm | 0.5358 | 89 → 94     | 0.36396 | $\pi \rightarrow \pi^*, n \rightarrow \pi^*$ |
|                                |                     |        | 92 → 94     | 0.19281 | $\pi \rightarrow \pi^*, n \rightarrow \pi^*$ |
|                                |                     |        | 92 → 95     | 0.12203 | $\pi \rightarrow \pi^*, n \rightarrow \pi^*$ |
|                                |                     |        | 93 → 95     | 0.48566 | $\pi \rightarrow \pi^*, n \rightarrow \pi^*$ |
|                                |                     |        | 93 → 97     | 0.20350 | $\pi \rightarrow \pi^*, n \rightarrow \pi^*$ |
| S <sub>0</sub> →S <sub>8</sub> | 5.1507 eV/240.71 nm | 0.0001 | 83 → 94     | 0.50632 | $n \rightarrow \pi^*$                        |
|                                |                     |        | 86 → 94     | 0.26909 | $n \rightarrow \pi^*$                        |
|                                |                     |        | 90 → 95     | 0.23037 | $n \rightarrow \pi^*$                        |
|                                |                     |        | 90 → 98     | 0.11020 | $n \rightarrow \pi^*$                        |
|                                |                     |        | 91 → 94     | 0.13372 | $n \rightarrow \pi^*$                        |
|                                |                     |        | 91 → 95     | 0.15959 | $n \rightarrow \pi^*$                        |
| S <sub>0</sub> →S <sub>9</sub> | 5.2000 eV/238.43 nm | 0.5084 | 87 → 94     | 0.48516 | $n \rightarrow \pi^*$                        |
|                                |                     |        | 89 → 94     | 0.31279 | $\pi \rightarrow \pi^*, n \rightarrow \pi^*$ |
|                                |                     |        | 92 → 95     | 0.16389 | $\pi \rightarrow \pi^*, n \rightarrow \pi^*$ |
|                                |                     |        | 93 → 95     | 0.30926 | $\pi \rightarrow \pi^*, n \rightarrow \pi^*$ |
|                                |                     |        | 93 → 97     | 0.13271 | $\pi \rightarrow \pi^*, n \rightarrow \pi^*$ |



|                          |                     |        |         |         |                                              |
|--------------------------|---------------------|--------|---------|---------|----------------------------------------------|
| $S_0 \rightarrow S_{10}$ | 5.3921 eV/229.94 nm | 0.0001 | 89 → 96 | 0.34049 | $\pi \rightarrow \pi^*, n \rightarrow \pi^*$ |
|                          |                     |        | 93 → 96 | 0.59605 | $\pi \rightarrow \pi^*, n \rightarrow \pi^*$ |
| $S_0 \rightarrow T_1$    | 2.2860 eV/542.37 nm | 0.0000 | 89 → 94 | 0.13161 | $\pi \rightarrow \pi^*, n \rightarrow \pi^*$ |
|                          |                     |        | 92 → 94 | 0.16136 | $\pi \rightarrow \pi^*, n \rightarrow \pi^*$ |
|                          |                     |        | 93 → 94 | 0.65347 | $\pi \rightarrow \pi^*, n \rightarrow \pi^*$ |
| $S_0 \rightarrow T_2$    | 2.9297 eV/423.19 nm | 0.0000 | 84 → 94 | 0.17652 | $\pi \rightarrow \pi^*, n \rightarrow \pi^*$ |
|                          |                     |        | 92 → 94 | 0.54959 | $\pi \rightarrow \pi^*, n \rightarrow \pi^*$ |
|                          |                     |        | 92 → 97 | 0.20292 | $\pi \rightarrow \pi^*, n \rightarrow \pi^*$ |
|                          |                     |        | 93 → 94 | 0.17391 | $\pi \rightarrow \pi^*, n \rightarrow \pi^*$ |
|                          |                     |        | 93 → 95 | 0.25630 | $\pi \rightarrow \pi^*, n \rightarrow \pi^*$ |
| $S_0 \rightarrow T_3$    | 3.1354 eV/395.44 nm | 0.0000 | 83 → 94 | 0.25735 | $n \rightarrow \pi^*$                        |
|                          |                     |        | 90 → 94 | 0.55100 | $n \rightarrow \pi^*$                        |
|                          |                     |        | 90 → 97 | 0.10185 | $n \rightarrow \pi^*$                        |
|                          |                     |        | 91 → 94 | 0.29505 | $n \rightarrow \pi^*$                        |
| $S_0 \rightarrow T_4$    | 3.8120 eV/325.25 nm | 0.0000 | 86 → 94 | 0.30763 | $n \rightarrow \pi^*$                        |
|                          |                     |        | 86 → 98 | 0.14162 | $n \rightarrow \pi^*$                        |
|                          |                     |        | 90 → 94 | 0.24253 | $n \rightarrow \pi^*$                        |
|                          |                     |        | 91 → 94 | 0.50691 | $n \rightarrow \pi^*$                        |
|                          |                     |        | 91 → 97 | 0.10150 | $n \rightarrow \pi^*$                        |
|                          |                     |        | 91 → 98 | 0.16529 | $, n \rightarrow \pi^*$                      |
| $S_0 \rightarrow T_5$    | 3.8272 eV/323.96 nm | 0.0000 | 89 → 94 | 0.23036 | $\pi \rightarrow \pi^*, n \rightarrow \pi^*$ |
|                          |                     |        | 92 → 98 | 0.24300 | $\pi \rightarrow \pi^*, n \rightarrow \pi^*$ |
|                          |                     |        | 93 → 95 | 0.56472 | $\pi \rightarrow \pi^*, n \rightarrow \pi^*$ |

---

Table S5-7. Calculated spin-orbit coupling matrix elements of FLPSs ( $\text{cm}^{-1}$ ), between the emitting states and the perturbing states with different multiplicity, calculated as

$$\sqrt{\left(|\langle S_0|H^{SO}|T_{1,x}\rangle|^2 + |\langle S_0|H^{SO}|T_{1,y}\rangle|^2 + |\langle S_0|H^{SO}|T_{1,z}\rangle|^2\right)/3} .$$

| FLPSs                 | FL                    | MB-FL | DB-FL  | Ph-FL |
|-----------------------|-----------------------|-------|--------|-------|
| $S_1 \rightarrow T_1$ | $1.27 \times 10^{-3}$ | 4.01  | 0.26   | 4.84  |
| $T_1 \rightarrow S_0$ | 0.27                  | 4.59  | 0.0056 | 0.36  |

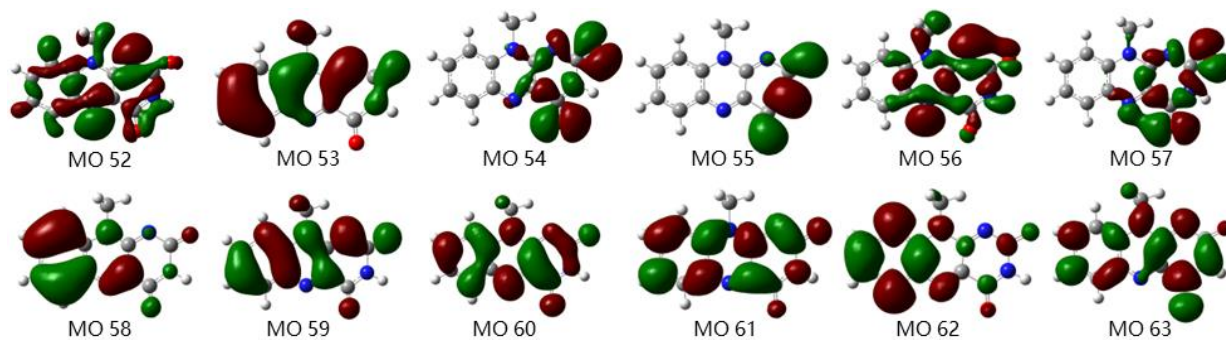

Figure S5-1. Isosurface plots of frontier molecular orbitals of FL involved in electron transitions contribute to UV-vis absorption. (Isovalue:  $\pm 0.02$  a.u.; C: Gray; O: Red; N: Blue; H: White.)

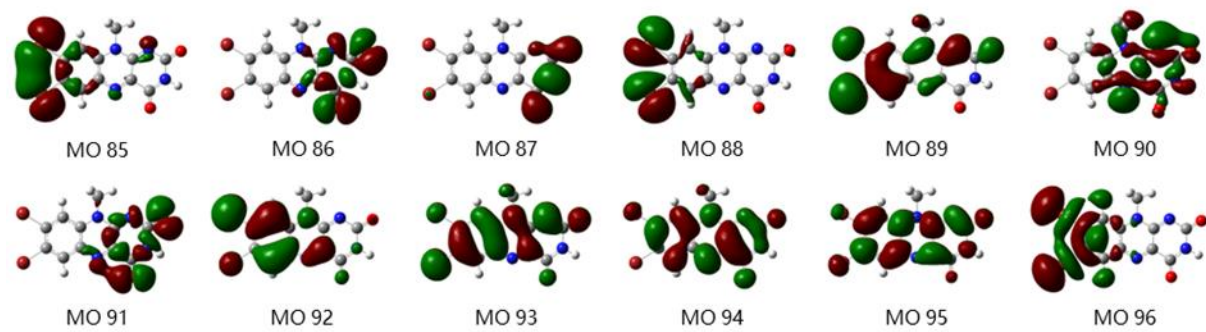

Figure S5-2. Isosurface plots of frontier molecular orbitals of DB-FL involved in electron transitions contribute to UV-vis absorption. (Isovalue:  $\pm 0.02$  a.u.; C: Gray; O: Red; N: Blue; H: White.)

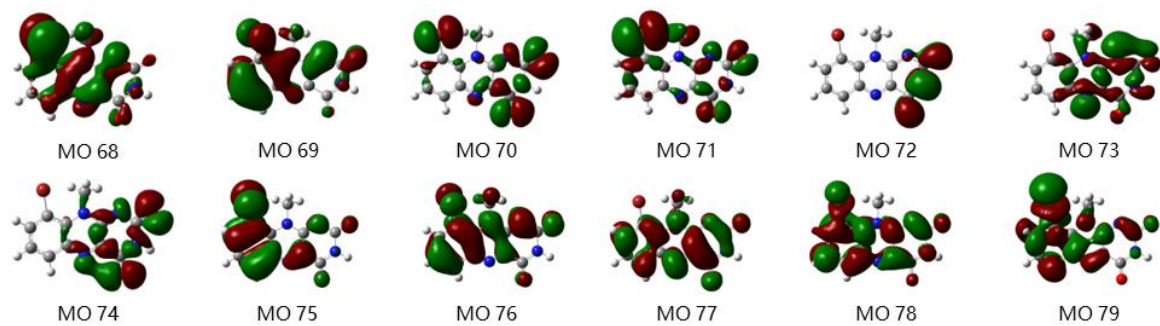

Figure S5-3. Isosurface plots of frontier molecular orbitals of MB-FL involved in electron transitions contribute to UV-vis absorption. (Isovalue:  $\pm 0.02$  a.u.; C: Gray; O: Red; N: Blue; H: White.)

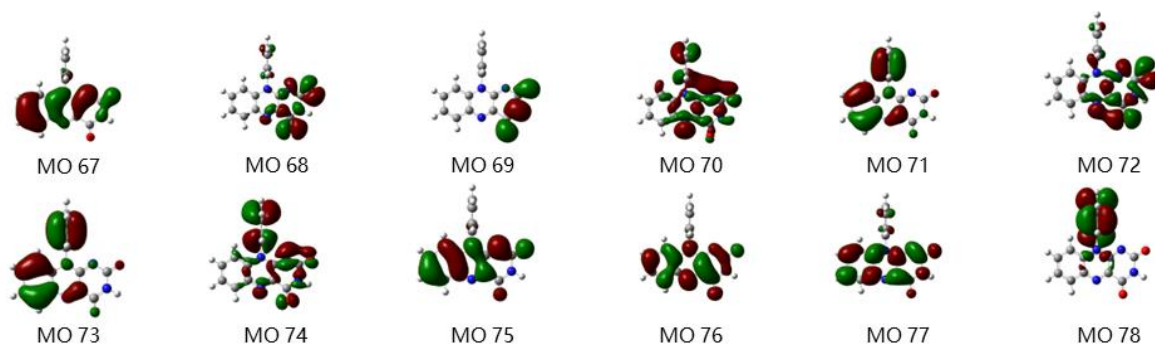

Figure S5-4. Isosurface plots of frontier molecular orbitals of Ph-FL involved in electron transitions contribute to UV-vis absorption. (Isovalue:  $\pm 0.02$  a.u.; C: Gray; O: Red; N: Blue; H: White.)

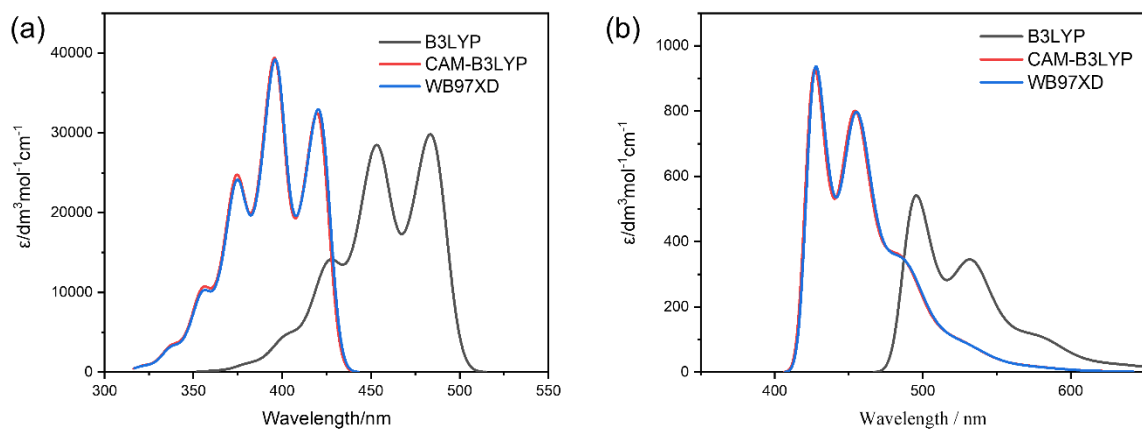

Figure S5-5 The vibration resolved absorption(a) and emission (b) spectra of DB-FL calculated with B3LYP, CAM-B3LYP and  $\omega$ B97XD functionals.

## 6. References

1. R. C. Binning and L. A. Curtiss, *J. Comput. Chem.*, 1990, **11**, 1206-1216.
2. M. M. Francl, W. J. Pietro, W. J. Hehre, J. S. Binkley, M. S. Gordon, D. J. Defrees and J. A. Pople, *J. Chem. Phys.*, 1982, **77**, 3654-3665.
3. V. A. Rassolov, M. A. Ratner, J. A. Pople, P. C. Redfern and L. A. Curtiss, *J. Comput. Chem.*, 2001, **22**, 976-984.
4. A. D. Becke, *J. Chem. Phys.*, 1993, **98**, 5648-5652.
5. C. T. Lee, W. T. Yang and R. G. Parr, *Phys. Rev. B*, 1988, **37**, 785-789.
6. S. Miertus, E. Scrocco and J. Tomasi, *Chem. Phys.*, 1981, **55**, 117-129.
7. R. Cammi and B. Mennucci, *J. Chem. Phys.*, 1999, **110**, 9877-9886.
8. J. Tomasi, B. Mennucci and R. Cammi, *Chem. Rev.*, 2005, **105**, 2999-3093.
9. M. J. Frisch, G. W. Trucks, H. B. Schlegel, G. E. Scuseria, M. A. Robb, J. R. Cheeseman, G. Scalmani, V. Barone, G. A. Petersson, H. Nakatsuji, X. Li, M. Caricato, A. V. Marenich, J. Bloino, B. G. Janesko, R. Gomperts, B. Mennucci, H. P. Hratchian, J. V. Ortiz, A. F. Izmaylov, J. L. Sonnenberg, Williams, F. Ding, F. Lipparini, F. Egidi, J. Goings, B. Peng, A. Petrone, T. Henderson, D. Ranasinghe, V. G. Zakrzewski, J. Gao, N. Rega, G. Zheng, W. Liang, M. Hada, M. Ehara, K. Toyota, R. Fukuda, J. Hasegawa, M. Ishida, T. Nakajima, Y. Honda, O. Kitao, H. Nakai, T. Vreven, K. Throssell, J. A. Montgomery Jr., J. E. Peralta, F. Ogliaro, M. J. Bearpark, J. J. Heyd, E. N. Brothers, K. N. Kudin, V. N. Staroverov, T. A. Keith, R. Kobayashi, J. Normand, K. Raghavachari, A. P. Rendell, J. C. Burant, S. S. Iyengar, J. Tomasi, M. Cossi, J. M. Millam, M. Klene, C. Adamo, R. Cammi, J. W. Ochterski, R. L. Martin, K. Morokuma, O. Farkas, J. B. Foresman and D. J. Fox, *Journal*, 2016.
10. O. Vahtras, H. Agren, P. Jorgensen, H. J. A. Jensen, T. Helgaker and J. Olsen, *J. Chem. Phys.*, 1992, **97**, 9178-9187.
11. H. Hettema, H. J. A. Jensen, P. Jorgensen and J. Olsen, *J. Chem. Phys.*, 1992, **97**, 1174-1190.
12. H. Agren, O. Vahtras, H. Koch, P. Jorgensen and T. Helgaker, *J. Chem. Phys.*, 1993, **98**, 6417-6423.
13. J. Olsen, D. L. Yeager and P. Jorgensen, *J. Chem. Phys.*, 1989, **91**, 381-388.
14. P. Jorgensen, H. J. A. Jensen and J. Olsen, *J. Chem. Phys.*, 1988, **89**, 3654-3661.
15. K. Aidas, C. Angeli, K. L. Bak, V. Bakken, R. Bast, L. Boman, O. Christiansen, R. Cimiraglia, S. Coriani, P. Dahle, E. K. Dalskov, U. Ekstrom, T. Enevoldsen, J. J. Eriksen, P. Ettenhuber, B. Fernandez, L. Ferrighi, H. Fliegl, L. Frediani, K. Hald, A. Halkier, C. Hattig, H. Heiberg, T. Helgaker, A. C. Hennum, H. Hettema, E. Hjertenaes, S. Host, I. M. Hoyvik, M. F. Iozzi, B. Jansik, H. J. A. Jensen, D. Jonsson, P. Jorgensen, J. Kauczor, S. Kirpekar, T. Kjrgaard, W. Klopper, S. Knecht, R. Kobayashi, H. Koch, J. Kongsted, A. Krapp, K. Kristensen, A. Ligabue, O. B. Lutnaes, J. I. Melo, K. V. Mikkelsen, R. H. Myhre, C. Neiss, C. B. Nielsen, P. Norman, J. Olsen, J. M. H. Olsen, A. Osted, M. J. Packer, F. Pawłowski, T. B. Pedersen, P. F. Provasi, S. Reine, Z. Rinkevicius, T. A. Ruden, K. Ruud, V. V. Rybkin, P. Salek, C. C. M. Samson, A. S. de Meras, T. Saue, S. P. A. Sauer, B. Schimmelpfennig, K. Sneskov, A. H. Steindal, K. O. Sylvester-Hvid, P. R. Taylor, A. M. Teale, E. I. Tellgren, D. P. Tew, A. J. Thorvaldsen, L. Thogersen, O. Vahtras, M. A. Watson, D. J. D. Wilson, M. Ziolkowski and H. Agren, *Wiley Interdiscip. Rev.-Comput. Mol. Sci.*, 2014, **4**, 269-284.



16. Q. Peng, Y. P. Yi, Z. G. Shuai and J. S. Shao, *J. Chem. Phys.*, 2007, **126**, 114302.
17. Q. Peng, Y. P. Yi, Z. G. Shuai and J. S. Shao, *J. Am. Chem. Soc.*, 2007, **129**, 9333-9339.
18. Y. L. Niu, Q. A. Peng, C. M. Deng, X. Gao and Z. G. Shuai, *J. Phys. Chem. A*, 2010, **114**, 7817-7831.
19. Y. Niu, Q. Peng and Z. Shuai, *Sci. China Ser. B-Chem.*, 2008, **51**, 1153-1158.
20. Q. Peng, Y. L. Niu, Q. H. Shi, X. Gao and Z. G. Shuai, *J. Chem. Theory Comput.*, 2013, **9**, 1132-1143.
